# Supplementary material
Source: Elsevier journal article supplement (https://www.sciencedirect.com/science/article/pii/S2173505018300189)
Supplement: mmc1 [file S2173505018300189:mmc1.doc]

**INDICADORES DE DEPRESIÓN MAYOR**

# Indicadores de proceso

**PROCESO/DM. EVALUACIÓN DE LA DEPRESIÓN MAYOR**

**CRITERIO 1. Evaluación general**

DEFINICIÓN: Proporción de pacientes con depresión mayor (DM) en cuya evaluación se tuvieron en cuenta: las características del episodio, los aspectos psicosociales, el grado de disfunción y/o discapacidad asociados, los aspectos que generan mayor impacto funcional en el día a día del paciente y la heterogeneidad del trastorno y la percepción que el paciente tiene sobre sí mismo y sus síntomas.

FÓRMULA: Pacientes con DM en cuya evaluación se tuvieron en cuenta: las características del episodio, los aspectos psicosociales, el grado de disfunción y/o discapacidad asociados, los aspectos que generan mayor impacto funcional en el día a día del paciente y la heterogeneidad del trastorno y la percepción que el paciente tiene sobre el mismo y sus síntomas / Total de pacientes diagnosticados de DM × 100.

INDICADOR DE: Proceso.

JUSTIFICACIÓN / EXCLUSIONES / ACLARACIONES: La evaluación de la DM debe realizarse con un enfoque amplio y no basarse únicamente en la evaluación de síntomas presentes. Algunas áreas a evaluar son: características del episodio (duración, cantidad e intensidad de los síntomas, comorbilidad), evaluación psicosocial (apoyo social y relaciones interpersonales) y grado de disfunción y/o discapacidad asociados (2++).

Además, se debe tener en cuenta la heterogeneidad de la DM, así como la percepción que el paciente tiene de sus síntomas y del trastorno. Es aconsejable prestar especial atención a los aspectos que más afectan en el día a día de los pacientes con DM y que generan mayor impacto funcional.

FUERZA DE LA RECOMENDACIÓN:

C - Evidencia suficiente derivada de estudios de nivel 2+, directamente aplicable a la población diana y que demuestren consistencia global en los resultados. Evidencia extrapolada de estudios de nivel 2++.

Q - Evidencia extraída de estudios cualitativos relevantes y de calidad. Esta categoría no está contemplada por el SIGN.

FUENTE/S DE INFORMACIÓN: Documentación clínica.

**CRITERIOS DE CALIDAD EN PSIQUIATRÍA**

**PROCESO/DM. EVALUACIÓN DE LA DEPRESIÓN MAYOR**

**CRITERIO 1. Evaluación general**

BIBLIOGRAFÍA:

- Cleare A, Pariante CM, Younh AH, et al. Evidence-based guidelines for treating depressive disorders with antidepressants: A revision of the 2008 British Association for Psychopharmacology guidelines. J Psychopharmacol. 2015; 29(15):459-525.
- Grupo de Trabajo de la Guía de Práctica Clínica sobre el Manejo de la Depresión en el Adulto. Guía de Práctica Clínica sobre el Manejo de la Depresión en el Adulto. Ministerio de Sanidad, Servicios Sociales e Igualdad. Agencia de Evaluación de Tecnologías Sanitarias de Galicia (avalia-t); 2014. Guías de Práctica Clínica en el SNS: Avalia-t 2013/06.
- National Collaborating Centre for Mental Health. Depression. The treatment and management of depression in adults. London: The British Psychological Society; 2009. Informe Nº: 90.
- Patten SB, Kennedy SH, Lam RW, et al. Canadian Network for Mood and Anxiety Treatments (CANMAT) Clinical Guidelines for the Management of Major Depressive Disorder in Adults. I. Classification, Burden and Principles of Management. J Affect Disord. 2009; 117 Suppl 1:S5-14.

**INDICADORES DE DEPRESIÓN MAYOR**

**PROCESO/DM. EVALUACIÓN DE LA DEPRESIÓN MAYOR**

**CRITERIO 2. Información sobre el diagnóstico y alternativas de tratamiento**

DEFINICIÓN: Proporción de pacientes con DM a los que tras el diagnóstico se les ofreció información completa sobre el trastorno y las opciones de tratamiento.

FÓRMULA: Pacientes con DM a los que tras el diagnóstico se les ofreció información completa sobre el trastorno y las opciones de tratamiento / Total de pacientes diagnosticados de DM × 100.

INDICADOR DE: Proceso.

JUSTIFICACIÓN / EXCLUSIONES / ACLARACIONES: Cuando se realiza un diagnóstico de DM se debe proporcionar al paciente la máxima información disponible sobre el trastorno y las opciones de tratamiento, intentando en todo momento reducir el sentimiento de culpa y el estigma.

FUERZA DE LA RECOMENDACIÓN:

Q - Evidencia extraída de estudios cualitativos relevantes y de calidad. Esta categoría no está contemplada por el SIGN.

FUENTE/S DE INFORMACIÓN: Documentación clínica.

BIBLIOGRAFÍA:

- Grupo de Trabajo de la Guía de Práctica Clínica sobre el Manejo de la Depresión en el Adulto. Guía de Práctica Clínica sobre el Manejo de la Depresión en el Adulto. Ministerio de Sanidad, Servicios Sociales e Igualdad. Agencia de Evaluación de Tecnologías Sanitarias de Galicia (avalia-t); 2014. Guías de Práctica Clínica en el SNS: Avalia-t 2013/06.

**CRITERIOS DE CALIDAD EN PSIQUIATRÍA**

**PROCESO/DM. MODELOS DE ATENCIÓN**

**PROCESO/DM. MODELOS DE ATENCIÓN**

| **CRITERIO 3. Modelo de atención escalonada en el adulto con DM** |
| --- |
| DEFINICIÓN: Proporción de pacientes con DM atendidos en Atención Primaria que precisan ser derivados a Salud Mental. |
| FÓRMULA: Pacientes con DM atendidos en Atención Primaria que precisan ser derivados a Salud Mental / Total de pacientes con DM atendidos en Atención Primaria × 100. |
| INDICADOR DE: Proceso. |
| JUSTIFICACIÓN / EXCLUSIONES / ACLARACIONES: A pesar de que los modelos de atención escalonada han sido recomendados por diferentes organizaciones, no se dispone de estudios que evalúen los resultados de su adopción en el manejo de la DM. La mayoría de las revisiones sistemáticas sobre atención colaborativa han puesto de manifiesto que estos modelos son más efectivos que la atención habitual y señalan que la eficiencia de esta última es mayor cuando se combina con atención escalonada. Sin embargo, existe una gran diversidad en los estudios que evalúan estos modelos y la evidencia de su efectividad es limitada, por lo que resulta difícil extraer conclusiones definitivas (1+). |
| FUERZA DE LA RECOMENDACIÓN:  B - Evidencia suficiente derivada de estudios de nivel 2++, directamente aplicable a la población diana y que demuestren consistencia global en los resultados. Evidencia extrapolada de estudios de nivel 1++ o 1+. |
| FUENTE/S DE INFORMACIÓN: Documentación clínica. |
| BIBLIOGRAFÍA:   - Calderón C, Mosquera I, Balagué L, et al. Modelos e intervenciones de colaboración entre Atención Primaria y Salud Mental en la atención a los pacientes diagnosticados de depresión: resultados de una meta-revisión. Investigación Comisionada. Vitoria-Gasteiz: Departamento de Salud, Gobierno Vasco; 2013. Informe Nº: D-13-13. - Grupo de Trabajo de la Guía de Práctica Clínica sobre el Manejo de la Depresión en el Adulto. Guía de Práctica Clínica sobre el Manejo de la Depresión en el Adulto. Ministerio de Sanidad, Servicios Sociales e Igualdad. Agencia de Evaluación de Tecnologías Sanitarias de Galicia (avalia-t); 2014. Guías de Práctica Clínica en el SNS: Avalia-t 2013/06. - National Collaborating Centre for Mental Health. Depression. The treatment and management of depression in adults. London: The British Psychological Society; 2009. Informe Nº: 90. - Thota AB, Sipe TA, Byard GJ, et al. Collaborative care to improve the management of depressive disorders: a community guide systematic review and meta-analysis. Am J Prev Med. 2012; 42(5):525-38. |

**INDICADORES DE DEPRESIÓN MAYOR**

**PROCESO/DM. RECOMENDACIONES GENERALES DE MANEJO**

**CRITERIO 4. Atención a las comorbilidades**

DEFINICIÓN: Proporción de pacientes con DM en cuyo tratamiento se presta atención a las comorbilidades.

FÓRMULA: Pacientes con DM en cuyo tratamiento se presta atención a las comorbilidades / Total de pacientes diagnosticados de DM y en tratamiento × 100.

FUERZA DE LA RECOMENDACIÓN:

 Práctica recomendada basada en la experiencia clínica y el consenso del equipo redactor.

FUENTE/S DE INFORMACIÓN: Documentación clínica.

JUSTIFICACIÓN / EXCLUSIONES / ACLARACIONES: El manejo de la DM debería incluir la atención a las comorbilidades psiquiátricas y físicas.

Prácticamente uno de cada dos pacientes con DM presenta otro trastorno mental. Los trastornos que con más frecuencia coexisten con la DM son: trastornos de ansiedad y trastornos de personalidad. La comorbilidad psiquiátrica influye en el impacto, el pronóstico y el manejo de la DM.

En lo que se refiere a la comorbilidad con enfermedades físicas, la DM se relaciona con diversos trastornos metabólicos, entre los que se incluyen: obesidad, diabetes tipo 2, hipertensión e hiperlipidemia.

La relación de estas patologías y la DM es compleja, ya que la DM predispone a su padecimiento, y al mismo tiempo la presencia de algunas de ellas aumenta la probabilidad de sufrir DM.

INDICADOR DE: Proceso.

**PROCESO/DM. RECOMENDACIONES GENERALES DE MANEJO**

**CRITERIOS DE CALIDAD EN PSIQUIATRÍA**

**PROCESO/DM. RECOMENDACIONES GENERALES DE MANEJO**

**SO/DM. RECOMENDACIONES GENERALES DE MANEJO**

**CRITERIO 4. Atención a las comorbilidades**

| BIBLIOGRAFÍA:   - Aragonès E, Piñol JL, Labad A. Comorbilidad de la depresión mayor con otros trastornos mentales comunes en pacientes de atención primaria. Aten Prim. 2009; 41:545-51. - Bystritsky A, Danial J, Kronemyer D. Interactions between diabetes and anxiety and depression: implications for treatment. Endocrinol Metab Clin North Am. 2014;43:269-83 - Gili M, Comas A, García-García M, Monzón S, Antoni SB, Roca M. Comorbidity be- tween common mental disorders and chronic somatic diseases in primary care patients. Gen Hosp Psychiatry 2010; 32(3):240-5. - Grupo de Trabajo de la Guía de Práctica Clínica sobre el Manejo de la Depresión en el Adulto. Guía de Práctica Clínica sobre el Manejo de la Depresión en el Adulto. Ministerio de Sanidad, Servicios Sociales e Igualdad. Agencia de Evaluación de Tecnologías Sanitarias de Galicia (avalia-t); 2014. Guías de Práctica Clínica en el SNS: Avalia-t 2013/06. - Kahl KG, Schweiger U, Correll C, et al. Depression, anxiety disorders, and metabolic syndrome in a population at risk for type 2 diabetes mellitus. Brain Behav. 2015; 5:e00306. - Roca M, Gili M, Garcia-Garcia M, Salva J, Vives M, Garcia Campayo J, Comas A. Pre- valence and comorbidity of common mental disorders in primary care. J Affect Disord. 2009; 119(1-3):52-8. |
| --- |

**INDICADORES DE DEPRESIÓN MAYOR**

**PROCESO/DM. RECOMENDACIONES GENERALES DE MANEJO**

**CRITERIO 5. Monitorización regular de sus síntomas**

DEFINICIÓN: Proporción de pacientes con DM en los que se ha establecido un plan de seguimiento que incluye visitas de evaluación de su estado.

FÓRMULA: Pacientes con DM en los que se ha establecido un plan de seguimiento que incluye visitas de evaluación del estado mental / Total de pacientes diagnosticados de DM y en tratamiento × 100.

INDICADOR DE: Proceso.

JUSTIFICACIÓN / EXCLUSIONES / ACLARACIONES: Se recomienda establecer un plan de seguimiento estructurado del paciente y monitorizar con regularidad su estado. La frecuencia de la evaluación y monitorización de síntomas debería realizarse en función de los siguientes aspectos: gravedad del cuadro, comorbilidad asociada, cooperación con el tratamiento, apoyo social y efectos secundarios del tratamiento prescrito.

FUERZA DE LA RECOMENDACIÓN:

 Práctica recomendada basada en la experiencia clínica y el consenso del equipo redactor.

FUENTE/S DE INFORMACIÓN: Documentación clínica.

BIBLIOGRAFÍA:

- Grupo de Trabajo de la Guía de Práctica Clínica sobre el Manejo de la Depresión en el Adulto. Guía de Práctica Clínica sobre el Manejo de la Depresión en el Adulto. Ministerio de Sanidad, Servicios Sociales e Igualdad. Agencia de Evaluación de Tecnologías Sanitarias de Galicia (avalia-t); 2014. Guías de Práctica Clínica en el SNS: Avalia-t 2013/06.

**CRITERIOS DE CALIDAD EN PSIQUIATRÍA**

**PROCESO/DM. TRATAMIENTO PSICOTERAPÉUTICO**

**CRITERIO 6. Combinación de fármacos y terapia cognitivo-conductual (TCC) en DM crónica y/o recurrente**

DEFINICIÓN: Proporción pacientes con DM crónica y/o recurrente a los que se proporciona tratamiento combinado de fármacos y TCC.

FÓRMULA: Pacientes con DM crónica y/o recurrente a los que se proporciona tratamiento combinado de fármacos y TCC / Total de pacientes con DM crónica y/o recurrente en tratamiento × 100.

INDICADOR DE: Proceso.

JUSTIFICACIÓN / EXCLUSIONES / ACLARACIONES: Para los pacientes con DM crónica y/o recurrente se recomienda el tratamiento combinado de fármacos y TCC. El tratamiento combinado de TCC + antidepresivos tiene menor riesgo de discontinuación que los antidepresivos y reduce de forma significativa la puntuación en escalas de evaluación. La evidencia de eficacia del tratamiento combinado a 6 y 12 meses es limitada (1+).

FUERZA DE LA RECOMENDACIÓN:

B - Evidencia suficiente derivada de estudios de nivel 2++, directamente aplicable a la población diana y que demuestren consistencia global en los resultados. Evidencia extrapolada de estudios de nivel 1++ o 1+.

FUENTE/S DE INFORMACIÓN: Documentación clínica.

BIBLIOGRAFÍA:

- Britton WB, Shahar B, Szepsenwol O, Jacobs WJ. Mindfulness-based cognitive therapy improves emotional reactivity to social stress: Results from a randomized controlled trial. Behav Ther. 2012; 43(2):365-80.
- Cuijpers P, Andersson G, Donker T, et Psychological treatment of depression: Results of a series of meta-analyses. Nor J Psychiatry. 2011; 65:354-64.
- Cuijpers P, Smit F Bohlmeijer E, et al. Efficacy of cognitive-behavioural therapy and other psychological treatments for adult depression: Meta-analytic study of publication bias. Br J Psychiatry. 2010;196:173-8.
- Grupo Trabajo de la Guía de Práctica Clínica sobre el Manejo de la Depresión en el Adulto. Guía de Práctica Clínica sobre el Manejo de la Depresión en el Adulto. Ministerio de Sanidad, Servicios Sociales e Igualdad. Agencia de Evaluación de Tecnologías Sanitarias de Galicia (avalia-t); 2014. Guías de Práctica Clínica en el SNS: Avalia-t 2013/06.
- National Collaborating Centre for Mental Health. Depression. The treatment and management of depression in adults. London: The British Psychological Society; 2009. Informe Nº: 90.
- Van Aalderen J, Donders A, Giommi F, Spinhoven P, Barendregt H, Speckens A. The efficacy of mindfulness-based cognitive therapy in recurrent depressed patients with and without a current depressive episode: A randomized controlled trial. Psychol Med. 2012; 42(5):989-1001.

**INDICADORES DE DEPRESIÓN MAYOR**

_______________________________________________________________________________

**PPROCESO/DM. TRATAMIENTO FARMACOLÓGICO**

**CRITERIO 7. Duración del tratamiento farmacológico tras la remisión del episodio**

DEFINICIÓN: Proporción de pacientes con DM en los que el tratamiento con antidepresivos se mantiene durante al menos 6 meses tras la remisión del episodio.

FÓRMULA: Pacientes con DM en los que el tratamiento con antidepresivos se mantiene al menos durante 6 meses tras la remisión del episodio / Total de pacientes con DM cuyo episodio remite tras tratamiento con antidepresivos × 100.

INDICADOR DE: Proceso.

JUSTIFICACIÓN / EXCLUSIONES / ACLARACIONES: NICE recomienda mantener el tratamiento con fármacos antidepresivos durante al menos 6 meses tras la remisión del episodio. Otras guías recomiendan un tratamiento de mantenimiento de 12 meses tras alcanzar la remisión de un primer episodio depresivo. Diferentes ECA y metanálisis han demostrado que el mantenimiento del tratamiento farmacológico previene eficazmente la recurrencia de los síntomas depresivos.

FUERZA DE LA RECOMENDACIÓN:

A - Al menos un metanálisis, revisión sistemática de ECA, o ECA de nivel 1++, directamente aplicables a la población diana, o evidencia suficiente derivada de estudios de nivel 1+, directamente aplicable a la población diana y que demuestren consistencia global en los resultados.

FUENTE/S DE INFORMACIÓN: Documentación clínica.

BIBLIOGRAFÍA:

- Cleare A, Pariante CM, Younh AH et Evidence-based guidelines for treating depressive disorders with antidepressants: revision of the 2008 British Association for Psychopharmacology guidelines. J Psychopharmacol. 2015; 29(15):459-525.
- Ellis P. Australian and New Zealand clinical practice guidelines for the treatment of depression. Aust N Z J Psychiatry. 2004; 38(6):389-407.
- Geddes JR, Carney SM, Davies C, et al. Relapse prevention with antidepressant drug treatment in depressive disorders: a systematic review. Lancet. 2003; 361(9358):653-61.
- Grupo de Trabajo de la Guía de Práctica Clínica sobre el Manejo de la Depresión en el Adulto. Guía de Práctica Clínica sobre el Manejo de la Depresión en el Adulto. Ministerio de Sanidad, Servicios Sociales e Igualdad. Agencia de Evaluación de Tecnologías Sanitarias de Galicia (avalia-t); 2014. Guías de Práctica Clínica en el SNS: Avalia-t 2013/06.
- Hansen R, Gaynes B, Thieda P, et al. Meta-analysis of major depressive disorder elapse and recurrence with second-generation antidepressants. Psychiatr Serv. 2008; 59(10):1121-30.
- National Collaborating Centre for Mental Health. Depression. The treatment and management of depression in adults. London: The British Psychological Society; 2009. Informe Nº: 90.

**CRITERIOS DE CALIDAD EN PSIQUIATRÍA**

**PROCESO/DM. TRATAMIENTO FARMACOLÓGICO**

**CRITERIO 8. Dosis en tratamiento de mantenimiento**

DEFINICIÓN: Proporción de pacientes con DM cuyo tratamiento de mantenimiento se realiza con la misma dosis con la que se alcanzó la respuesta de mejoría.

FÓRMULA: Pacientes con DM cuyo tratamiento de mantenimiento se realiza con la misma dosis con la que se alcanzó la respuesta de mejoría / Total de pacientes con DM y en tratamiento farmacológico de mantenimiento × 100.

INDICADOR DE: Proceso.

JUSTIFICACIÓN / EXCLUSIONES / ACLARACIONES: La dosis de mantenimiento debe ser la misma con la que se obtuvo la mejoría, ya que se ha observado que aquellos pacientes que reducen la dosis presentan mayores tasas de recaída que los que continúan con la misma (1+).

FUERZA DE LA RECOMENDACIÓN:

A - Al menos un metanálisis, revisión sistemática de ECA, o ECA de nivel 1++, directa- mente aplicables a población diana, o evidencia suficiente derivada de estudios de nivel 1+, directamente aplicable a la población diana y que demuestren consistencia global en los resultados.

FUENTE/S DE INFORMACIÓN: Documentación clínica.

BIBLIOGRAFÍA:

- Grupo de Trabajo de la Guía de Práctica Clínica sobre el Manejo de la Depresión en el Adulto. Guía de Práctica Clínica sobre el Manejo de la Depresión en el Adulto. Ministerio de Sanidad, Servicios Sociales e Igualdad. Agencia de Evaluación de Tecnologías Sanitarias de Galicia (avalia-t); 2014. Guías de Práctica Clínica en el SNS: Avalia-t 2013/06.
- Papakostas GI, Perlis RH, Seifert C, Fava M. Antidepressant dose reduction and the risk of relapse in major depressive disorder. Psychother Psychosom. 2007; 76(5):266-70.

**INDICADORES DE DEPRESIÓN MAYOR**

__________________________________________________________________________

**PROCESO/DM. TRATAMIENTO PSICOTERAPÉUTICO EN DEPRESIÓN MAYOR RESISTENTE**

**CRITERIO 9. Tratamiento psicoterapéutico en DM resistente**

DEFINICIÓN: Proporción de pacientes con DM resistente al tratamiento farmacológico a los que se proporciona tratamiento combinado de antidepresivos y terapia cognitivo-conductual (TCC).

FÓRMULA: Pacientes con DM resistente al tratamiento farmacológico a los que se proporciona tratamiento combinado de antidepresivos y TCC / Total de pacientes con DM resistente al tratamiento farmacológico × 100.

INDICADOR DE: Proceso.

JUSTIFICACIÓN / EXCLUSIONES / ACLARACIONES: La adición de terapia cognitiva al tratamiento habitual (que incluía tratamiento farmacológico) en pacientes con DM resistente atendidos en Atención Primaria mostró mejores tasas de respuesta y remisión que el tratamiento habitual aislado (1+).

FUERZA DE LA RECOMENDACIÓN:

B - Evidencia suficiente derivada de estudios de nivel 2++, directamente aplicable a la población diana y que demuestren consistencia global en los resultados. Evidencia extrapolada de estudios de nivel 1++ o 1+.

FUENTE/S DE INFORMACIÓN: Documentación clínica.

BIBLIOGRAFÍA:

- Grupo de Trabajo de la Guía de Práctica Clínica sobre el Manejo de la Depresión en Adulto. Guía de Práctica Clínica sobre el Manejo de la Depresión en el Adulto. Ministerio de Sanidad, Servicios Sociales e Igualdad. Agencia de Evaluación de Tecnologías Sanitarias de Galicia (avalia-t); 2014. Guías de Práctica Clínica en el SNS: Avalia-t 2013/06.
- Wiles N, Thomas L, Abel A, et al. Cognitive behavioural therapy as an adjunct to pharmacotherapy for primary care based patients with treatment resistant depression: results of the CoBalT randomised controlled trial. Lancet. 2013; 381(9864):375-84.

**CRITERIOS DE CALIDAD EN PSIQUIATRÍA**

**PROCESO/DM. ESTRATEGIAS DE TRATAMIENTO EN DEPRESIÓN MAYOR CON AUSENCIA DE RESPUESTA O REMISIÓN**

**CRITERIO 10. Ausencia de respuesta en la sexta semana de tratamiento**

DEFINICIÓN: Proporción pacientes diagnosticados de DM que no presentan respuesta al tratamiento antidepresivo (escitalopram, duloxetina, clomipramina tras ensayo con ISRS, desipramina, imipramina, nortriptilina o citalopram) tras la sexta semana y en los que se sigue cualquiera de las siguientes estrategias: cambio de antidepresivo (venlafaxina, duloxetina), combinación de antidepresivos (duloxetina y reboxetina) o potenciación con litio o antipsicóticos (de clomipramina tras ISRS con aripiprazol; fluoxetina con olanzapina; con risperidona o con quetiapina).

FÓRMULA: Pacientes diagnosticados de DM que no presentan respuesta al tratamiento antidepresivo tras la sexta semana y en los que se sigue cualquiera de las siguientes estrategias: cambio de antidepresivo, combinación de antidepresivos o potenciación con litio o antipsicóticos / Total de pacientes diagnosticados de DM que no presentan respuesta al tratamiento antidepresivo tras la sexta semana × 100.

INDICADOR DE: Proceso

JUSTIFICACIÓN /EXCLUSIONES / ACLARACIONES:

*Cambio de antidepresivo*

Existe cierta evidencia de eficacia de la venlafaxina y el escitalopram en pacientes con DM resistente (1+).

En pacientes con poca o ninguna respuesta tras semanas de tratamiento con 10 mg/día de escitalopram, el cambio a duloxetina o el mantenimiento/incremento de escitalopram produjo tasas de respuesta similares; sin embargo, la tasa de remisión fue mayor en el grupo que cambió a duloxetina (1+).

*Combinación de antidepresivos*

Existe cierta evidencia de que la combinación de antidepresivos tiende a reducir los síntomas en mayor proporción que la continuación con el mismo antidepresivo; sin embargo, la combinación produce más efectos secundarios (1+). En pacientes con DM resistente a un tratamiento previo con duloxetina, la combinación de duloxetina a la dosis inicial y reboxetina redujo en un 66 la puntuación de la escala HAMD (*Hamilton Rating Scale for Depression*), siendo el porcentaje de respuesta del 76 % y el de remisión del 69 % (3).

*Potenciación con un antipsicótico*

En pacientes con DM recurrente e historia de no respuesta a un ensayo con ISRS y posteriormente con clomipramina, el aripiprazol como potenciador del tricíclico disminuyó significativamente la puntuación de la escala HAMD, siendo la tasa de respuesta del 91 % y la de remisión del 34 % a las 24 semanas (3).

**INDICADORES DE DEPRESIÓN MAYOR**

__________________________________________________________________________

**PROCESO/DM. ESTRATEGIAS DE TRATAMIENTO EN DEPRESIÓN MAYOR CON AUSENCIA DE RESPUESTA O REMISIÓN**

**CRITERIO 10. Ausencia de respuesta en la sexta semana de tratamiento**

La combinación de olanzapina y fluoxetina en pacientes con DM resistente mostró una mejoría significativa de los síntomas (escala MADRS, *Montgomery Asberg Depression Rating Scale*) así como una mayor tasa de remisión en comparación con la monoterapia con cualquiera de los dos fármacos (1+).

En pacientes con DM y fracaso previo en dos o más tratamientos con diferentes antidepresivos, la potenciación con risperidona obtuvo un porcentaje de respuesta del 47 % y de remisión del 27 %, sin diferencias significativas con los obtenidos por ácido valproico, buspirona, trazodona y triyodotironina (1+).

En pacientes con DM resistente la potenciación de su tratamiento con quetiapina redujo de forma significativa la puntuación en la escala MADRS aumentó la tasa de remisión, no así la de respuesta (1+).

*Potenciación con litio*

La utilización del litio como potenciador de un tratamiento antidepresivo (clomipramina, desipramina, imipramina, nortriptilina citalopram) mejoró significativamente la tasa de respuesta aunque no así la de remisión. Asimismo aumentó el porcentaje de abandonos (1+) (NICE).

FUERZA DE LA RECOMENDACIÓN:

B - Evidencia suficiente derivada de estudios de nivel 2++, directamente aplicable a la población diana y que demuestren consistencia global en los resultados. Evidencia extrapolada de estudios de nivel 1++ o 1+.

FUENTE/S DE INFORMACIÓN: Documentación clínica.

**CRITERIOS DE CALIDAD EN PSIQUIATRÍA**

**PROCESO/DM. ESTRATEGIAS DE TRATAMIENTO EN DEPRESIÓN MAYOR CON AUSENCIA DE RESPUESTA O REMISIÓN**

**CRITERIO 10. Ausencia de respuesta en la sexta semana de tratamiento**

BIBLIOGRAFÍA:

- Bauer M, El-Khalili Datto C, Szamosi J, Eriksson H. A pooled analysis of two randomised, placebo-controlled studies of extended release quetiapine fumarate adjunctive to antidepressant therapy in patients with major depressive disorder. J Affect Disord. 2010; 127(1-3):19-30.
- Cleare A, Pariante CM, Younh AH, al. Evidence-based guidelines for treating de- pressive disorders with antidepressants: A revision of the 2008 British Association for Psychopharmacology guidelines. J Psychopharmacol. 2015; 29(15):459-525.
- Fabrazzo M, Perris Monteleone P, Esposito G, Catapano F, Maj M. Aripiprazole augmentation strategy in clomipramine-resistant depressive patients: an open preliminary study Eur Neuropsychopharmacol. 2012;22(2):132-6.
- Fang Y, Yuan C, Xu Y, et al. A pilot study of the efficacy and safety of paroxetine augmented with risperidone, valproate, buspirone, trazodone, or thyroid hormone in adult Chinese patients with treatment-resistant major depression. J Clin Psychopharmacol. 2011; 31(5):638-4.
- Grupo de Trabajo de la Guía Práctica Clínica sobre el Manejo de la Depresión en el Adulto. Guía Práctica Clínica sobre el Manejo de la Depresión en el Adulto. Ministerio de Sanidad, Servicios Sociales e Igualdad. Agencia de Evaluación de Tecnologías Sanitarias de Galicia (avalia-t); 2014. Guías de Práctica Clínica en el SNS: Avalia-t 2013/06.
- National Collaborating Centre for Mental Health. Depression. The treatment and management of depression adults. London: The British Psychological Society; 2009. Informe Nº: 90.
- Romera I, Perez V, Manuel Menchon J, et al. Early vs. conventional switching of antidepressants in patients with MDD and moderate to severe pain: A double-blind randomized study J Affect Disord. 2012;143(1-3):47-55.

**INDICADORES DE DEPRESIÓN MAYOR**

__________________________________________________________________________

**PROCESO/DM. TERAPIA ELECTROCONVULSIVA**

**CRITERIO 11. Terapia electroconvulsiva (TEC) en pacientes con DM grave**

DEFINICIÓN: Proporción de pacientes con DM grave para los se considera la TEC como alternativa terapéutica.

FÓRMULA: Pacientes con DM grave para los que se considera la TEC como alternativa terapéutica / Total de pacientes con DM grave × 100.

INDICADOR DE: Proceso.

JUSTIFICACIÓN / EXCLUSIONES / ACLARACIONES: La TEC es un tratamiento efectivo en adultos con DM grave (1+). Esta terapia debería considerarse una alternativa especialmente en aquellos casos en los que existe la necesidad de ofrecer una rápida respuesta debido a la alta intencionalidad suicida, al deterioro físico grave o al fracaso de otros tratamientos.

FUERZA DE LA RECOMENDACIÓN:

A - Al menos un metanálisis, revisión sistemática de ECA, o ECA de nivel 1++, directamente aplicables a la población diana, o evidencia suficiente derivada de estudios de nivel 1+, directamente aplicable a la población diana y que demuestren consistencia global en los resultados.

FUENTE/S DE INFORMACIÓN: Documentación clínica.

BIBLIOGRAFÍA:

- Cleare A, Pariante CM, Younh AH, et al. Evidence-based guidelines for eating depressive disorders with antidepressants: A revision of the 2008 British Association for Psychopharmacology guidelines. J Psychopharmacol. 2015;29(15):459-525.
- Grupo de Trabajo de la Guía de Práctica Clínica sobre el Manejo de la Depresión en el Adulto. Guía de Práctica Clínica sobre el Manejo de la Depresión en el Adulto. Ministerio de Sanidad, Servicios Sociales e Igualdad. Agencia de Evaluación de Tecnologías Sanitarias de Galicia (avalia-t); 2014. Guías de Práctica Clínica en el SNS: Avalia-t 2013/06.
- National Collaborating Centre for Mental Health. Depression. The treatment and management of depression in adults. London: The British Psychological Society; 2009. Informe Nº: 90.

**CRITERIOS DE CALIDAD EN PSIQUIATRÍA**

**PROCESO/DM. EJERCICIO FÍSICO**

**CRITERIO 12. Ejercicio físico como hábito saludable en pacientes con DM**

DEFINICIÓN: Proporción de pacientes con DM a los que se prescribe ejercicio físico acorde a su condición física y a sus preferencias individuales como un complemento al tratamiento con antidepresivos y/o psicoterapia.

FÓRMULA: Pacientes con DM a los que se prescribe ejercicio físico acorde a su condición física y a sus preferencias individuales como un complemento al tratamiento con antidepresivos y/o psicoterapia / Total de pacientes con DM × 100.

INDICADOR DE: Proceso.

JUSTIFICACIÓN / EXCLUSIONES / ACLARACIONES: Es aconsejable que a los pacientes con DM se les recomiende la realización de ejercicio físico como un hábito de vida saludable. Es imprescindible que el paciente esté motivado y la realización de ejercicio sea aceptada por el paciente, acorde a su condición física y ajustada a sus preferencias individuales. Existe evidencia moderada de la eficacia del ejercicio físico en la reducción de síntomas depresivos frente a la no intervención (1+).

Según la OMS, en DM moderada grave la actividad física debe considerarse un complemento del tratamiento con antidepresivos o psicoterapia breve estructurada (1+).

FUERZA DE LA RECOMENDACIÓN:

B - Evidencia suficiente derivada de estudios de nivel 2++, directamente aplicable a la población diana y que demuestren consistencia global en los resultados. Evidencia extrapolada de estudios de nivel 1++ o 1+.

FUENTE/S DE INFORMACIÓN: Documentación clínica.

**INDICADORES DE DEPRESIÓN MAYOR**

**PROCESO/DM. EJERCICIO FÍSICO**

**CRITERIO 12. Ejercicio físico como hábito saludable en pacientes con DM**

BIBLIOGRAFÍA:

- Cooney GM, Dwan K, Greig CA, et al. Exercise for depression. Cochrane Database Syst Rev. 2013;12(9):CD004366.
- Danielsson L, Noras AM, Waern M, Carlsson J. Exercise in the treatment of major depression: A systematic review grading the quality of evidence. Physiother Theory Pract. 2013; 29(8):573-85.
- Garcia-Toro M, Ibarra O, Gili M, et al. Four hygienic-dietary recommendations as add-on treatment in depression: a randomized-controlled trial. J Affect Disord. 2012; 140(2):200-3.
- Grupo de Trabajo de la Guía de Práctica Clínica sobre el Manejo de la Depresión en el Adulto. Guía de Práctica Clínica sobre el Manejo de la Depresión en el Adulto. Ministerio de Sanidad, Servicios Sociales Igualdad. Agencia de Evaluación de Tecnologías Sanitarias de Galicia (avalia-t); 2014. Guías de Práctica Clínica en el SNS: Avalia-t 2013/06.
- National Collaborating Centre for Mental Health. Depression. The treatment and management of depression in adults. London: The British Psychological Society; 2009. Informe Nº: 90.
- Scottish Intercollegiate Guidelines Network. Non-pharmaceutical management of depression in adults. A national clinical guideline. Edinburgh: Scottish Intercollegiate Guidelines Network; 2010 [citado oct 2013]. Disponible en: <http://www.sign.ac.uk/> pdf/sign114.pdf
- World Health Organization. Mental health: Physical activity. Geneva: WHO; 2012 [citado 10 dic 2013]. [aprox. 2 pantallas]. Disponible en: <http://www.who.int/mental_health/mhgap/evidence/depression/q6/en/index.html>

**CRITERIOS DE CALIDAD EN PSIQUIATRÍA**

# Indicadores de resultado

**RESULTADO/DM. RECUPERACIÓN FUNCIONAL**

**CRITERIO 1. Baja laboral en pacientes con DM**

DEFINICIÓN: Proporción de pacientes con DM con baja laboral.

FÓRMULA: Pacientes con DM con baja laboral / Total de pacientes diagnosticados de DM × 100.

INDICADOR DE: Resultado.

JUSTIFICACIÓN / EXCLUSIONES / ACLARACIONES: La DM tiene un importante impacto en el nivel de funcionalidad y productividad de la persona que la sufre, quien en muchas ocasiones requiere una baja laboral que puede prolongarse en el tiempo. Esto convierte a la DM en el trastorno mental que más costes supone para el sistema en Europa. Las bajas por enfermedad y la pérdida de productividad suponen más de la mitad del mencionado coste. La situación de baja laboral prolongada es un resultado de un cuadro depresivo pero a su vez impide una adecuada recuperación del paciente y puede incidir negativa- mente en su situación socioeconómica en el futuro.

FUERZA DE LA RECOMENDACIÓN:

D - Evidencia de nivel 3 o 4. Evidencia extrapolada de estudios de nivel 2+.

FUENTE/S DE INFORMACIÓN: Documentación clínica.

BIBLIOGRAFÍA:

- Curran C, Knapp M, McDaid D, Tomasson K, The MHEEN Group. Mental health and employment: An overview of patterns and policies across Western Europe. J Ment Health. 2007; 16:195-209.
- Grupo de Trabajo de la Guía de Práctica Clínica sobre el Manejo de la Depresión en el Adulto. Guía de Práctica Clínica sobre el Manejo de la Depresión en el Adulto. Ministerio de Sanidad, Servicios Sociales e Igualdad. Agencia de Evaluación de Tecnologías Sanitarias de Galicia (avalia-t); 2014. Guías de Práctica Clínica en el SNS: Avalia-t 2013/06.
- HaroJM, Palacin C, Vilagut G, et al. Prevalencia de los trastornos mentales y factores aso- ciados: resultados del estudio ESEMeD-Espana. Med Clin (Barc). 2006;126(12):445-51.
- Sobocki P, Jönsson B, Angst J, Rehnberg C. Cost of depression in Europe. J Ment Health Policy Econ. 2006; 9:87-98.

**INDICADORES DE DEPRESIÓN MAYOR**

**RESULTADO/DM. ADHERENCIA TERAPÉUTICA EN ATENCIÓN PRIMARIA**

**CRITERIO 2. Adherencia terapéutica en Atención Primaria de pacientes con DM**

DEFINICIÓN: Proporción de pacientes con DM que presentan una buena adherencia terapéutica al tratamiento que reciben por parte de su médico de Atención Primaria.

FÓRMULA: Pacientes con DM que presentan una buena adherencia terapéutica al tratamiento que reciben por parte de su médico de Atención Primaria / Total de pacientes con DM atendidos en Atención Primaria × 100.

INDICADOR DE: Resultado.

JUSTIFICACIÓN / EXCLUSIONES / ACLARACIONES: En Atención Primaria la tasa de in- cumplimiento del tratamiento antidepresivo es elevada (aproximadamente del 50 %) des- de las primeras semanas tras iniciarlo. Algunos factores que explican la falta de adherencia al tratamiento farmacológico son la presencia de efectos secundarios y la ausencia del efecto deseado o el elevado tiempo de respuesta de los tratamientos.

FUERZA DE LA RECOMENDACIÓN:

D - Evidencia de nivel 3 o 4. Evidencia extrapolada de estudios de nivel 2+.

FUENTE/S DE INFORMACIÓN: Documentación clínica.

BIBLIOGRAFÍA:

- Calderón C, Retolaza A, Payo J, Bacigalupe A, Zallo E, Mosquera I. Perspectivas de los pacientes diagnosticados de depresión y atendidos por médicos de familia y psiquiatras. Aten Primaria. 2012;44(10):595-602.
- Grupo de Trabajo de la Guía de Práctica Clínica sobre la Depresión Mayor en la Infancia y en la Adolescencia. Guía de Práctica Clínica sobre la Depresión Mayor en la Infancia y en la Adolescencia. Plan de Calidad para el Sistema Nacional de Salud del Ministerio de Sanidad y Política Social. Axencia de Avaliación de Tecnoloxías Sanitarias de Galicia (avalia-t); 2009. Guías de Práctica Clínica en el SNS: avalia-t Nº 2007/09.
- Párraga-Martínez I, López-Torres Hidalgo J, del Campo del Campo JM, Villena Ferrer A, Morena Rayo S, Escobar Rabadán F. Seguimiento la adherencia al tratamiento antidepresivo en pacientes que inician su consumo. Aten Prim. 2014; 46:357-66.
- Roca M, Armengol S, Salvador-Carulla L, Monzón S, Salvà J, Gili M. Adherence to medication in depressive patients. J Clin Psychopharmacol. 2011; 31(4):541-3.

**CRITERIOS DE CALIDAD EN PSIQUIATRÍA**

**RESULTADO/DM. SEGUIMIENTO**

**CRITERIO 3. Seguimiento desde Atención Primaria de pacientes con DM**

DEFINICIÓN: Proporción de pacientes con DM en seguimiento en Atención Primaria.

FÓRMULA: Pacientes con DM en seguimiento en Atención Primaria / Total de pacientes con DM × 100.

INDICADOR DE: Resultado.

JUSTIFICACIÓN / EXCLUSIONES / ACLARACIONES: A pesar de que los modelos de atención escalonada han sido recomendados por diferentes organizaciones, no se dispone de estudios que evalúen los resultados de su adopción en el manejo de la DM. La mayoría de las revisiones sistemáticas sobre atención colaborativa han puesto de manifiesto que estos modelos más efectivos que la atención habitual y señalan que la eficiencia de esta última es mayor cuando se combina con atención escalonada. Sin embargo, existe una gran diversidad en los estudios que evalúan estos modelos y la evidencia de su efectividad es limitada, por lo que resulta difícil extraer conclusiones definitivas (1+).

FUERZA DE LA RECOMENDACIÓN:

B - Evidencia suficiente derivada de estudios de nivel 2++, directamente aplicable a la población diana y que demuestren consistencia global en los resultados. Evidencia extrapolada de estudios de nivel 1++ o 1+.

FUENTE/S DE INFORMACIÓN: Documentación clínica.

BIBLIOGRAFÍA:

- Calderón C, Mosquera I, Balagué L, et Modelos e intervenciones de colaboración entre Atención Primaria y Salud Mental en la atención a los pacientes diagnostica- dos de Depresión: resultados de una meta-revisión. Investigación Comisionada. Vitoria-Gasteiz: Departamento de Salud, Gobierno Vasco; 2013. Informe Nº: D-13-13.
- Grupo de Trabajo de la Guía de Práctica Clínica sobre el Manejo de la Depresión en el Adulto. Guía de Práctica Clínica sobre el Manejo de la Depresión en el Adulto. Ministerio de Sanidad, Servicios Sociales e Igualdad. Agencia de Evaluación de Tecnologías Sanitarias de Galicia (avalia-t); 2014. Guías de Práctica Clínica en el SNS: Avalia-t 2013/06.
- National Collaborating Centre for Mental Health. Depression. The treatment and management depression in adults. London: The British Psychological Society; 2009. Informe Nº: 90.
- Thota AB, Sipe TA, Byard GJ, et al. Collaborative care to improve the management of depressive disorders: a community guide systematic review and meta-analysis. Am J Prev Med. 2012; 42(5):525-38.

**INDICADORES DE DEPRESIÓN MAYOR**

**RESULTADO/DM. SEGUIMIENTO**

**CRITERIO 4. Seguimiento desde Atención Especializada de pacientes con DM**

DEFINICIÓN: Proporción de pacientes con DM en seguimiento en Atención Especializada.

FÓRMULA: Pacientes con DM en seguimiento en Atención Especializada / Total pacientes con DM × 100.

INDICADOR DE: Resultado.

JUSTIFICACIÓN / EXCLUSIONES / ACLARACIONES: A pesar de que los modelos de atención escalonada han sido recomendados por diferentes organizaciones, no se dispone de estudios que evalúen los resultados de su adopción en el manejo de la DM. La mayoría de las revisiones sistemáticas sobre atención colaborativa han puesto de manifiesto que estos modelos son más efectivos que la atención habitual y señalan que la eficiencia de esta última es mayor cuando se combina con atención escalonada. Sin embargo, existe una gran diversidad en los estudios que evalúan estos modelos y la evidencia de su efectividad es limitada, por lo que resulta difícil extraer conclusiones definitivas (1+).

FUERZA DE LA RECOMENDACIÓN:

B - Evidencia suficiente derivada de estudios de nivel 2++, directamente aplicable a la población diana y que demuestren consistencia global en los resultados. Evidencia extrapolada de estudios de nivel 1++ o 1+.

FUENTE/S DE INFORMACIÓN: Documentación clínica.

BIBLIOGRAFÍA:

- Calderón C, Mosquera I, Balagué L, et al. Modelos e intervenciones de colaboración entre Atención Primaria y Salud Mental en la atención a los pacientes diagnostica- dos de depresión: resultados de una meta-revisión. Investigación Comisionada. Vitoria-Gasteiz: Departamento de Salud, Gobierno Vasco; 2013. Informe Nº: D-13-13.
- Grupo de Trabajo de la Guía de Práctica Clínica sobre el Manejo de la Depresión en el Adulto. Guía de Práctica Clínica sobre el Manejo de la Depresión en el Adulto. Ministerio de Sanidad, Servicios Sociales e Igualdad. Agencia de Evaluación de Tecnologías Sanitarias de Galicia (avalia-t); 2014. Guías de Práctica Clínica en el SNS: Avalia-t 2013/06.
- National Collaborating Centre for Mental Health. Depression. The treatment and management of depression in adults. London: The British Psychological Society; 2009. Informe Nº: 90.
- Thota AB, Sipe TA, Byard GJ, et al. Collaborative care to improve the management of depressive disorders: a community guide systematic review and meta-analysis. Am J Prev Med. 2012; 42(5):525-38.

**CRITERIOS DE CALIDAD EN PSIQUIATRÍA**

**RESULTADO/DM. ACCESIBILIDAD**

**CRITERIO 5. Tiempo transcurrido desde la identificación de riesgo de suicidio hasta que se produce la atención al paciente con DM**

DEFINICIÓN: Tiempo de atención al paciente con riesgo de suicidio en pacientes con DM.

FÓRMULA: Tiempo transcurrido desde que se detecta riesgo de suicidio en un paciente con DM hasta que recibe la atención.

INDICADOR DE: Resultado.

JUSTIFICACIÓN / EXCLUSIONES / ACLARACIONES: La DM es uno de los factores más relacionados con la conducta suicida. En personas con DM los principales factores de riesgo de suicidio son: intentos de suicidio previos, antecedentes familiares de suicidio, trastorno límite de la personalidad, impulsividad, desesperanza, eventos vitales tempranos traumáticos, estrés vital, bajo apoyo social, sexo masculino y dependencia del alcohol y otras drogas. Cuando se detecta riesgo de suicidio se debe prestar la atención más inmediata.

FUERZA DE LA RECOMENDACIÓN:

 Práctica recomendada basada en la experiencia clínica y el consenso del equipo redactor.

FUENTE/S DE INFORMACIÓN: Documentación clínica.

BIBLIOGRAFÍA:

- García-Herrera Pérez Bryan JM, Nogueras Morillas EV, Muñoz Cobos F, Morales Asencio JM. Guía de Práctica Clínica para el tratamiento de la depresión en Atención Primaria. Distrito Sanitario Málaga-UGC Salud Mental Hospital Regional Universitario “Carlos Haya”. Málaga; 2011.
- Grupo de Trabajo de la Guía Práctica Clínica sobre el Manejo de la Depresión en el Adulto. Guía de Práctica Clínica sobre el Manejo de la Depresión en el Adulto. Ministerio de Sanidad, Servicios Sociales e Igualdad. Agencia de Evaluación de Tecnologías Sanitarias de Galicia (avalia-t); 2014. Guías de Práctica Clínica en el SNS: Avalia-t 2013/06.

**INDICADORES DE ESQUIZOFRENIA**

# Indicadores de proceso

**PROCESO/ESQ. ASPECTOS GENERALES**

**CRITERIO 1. Valoración inicial completa del paciente con esquizofrenia**

DEFINICIÓN: Proporción de pacientes que reciben valoración inicial previa la intervención farmacológica (tomografía craneal, valoración neurocognitiva, electrocardiograma, medición de la altura y el peso, pruebas de detección de sustancias ilegales, perfiles lipídicos y glucemia plasmática en ayunas).

FÓRMULA: Pacientes con esquizofrenia en tratamiento con antipsicóticos que reciben valoración inicial previa a la intervención farmacológica / Total de pacientes tratados con antipsicóticos × 100.

INDICADOR DE: Proceso.

JUSTIFICACIÓN / EXCLUSIONES / ACLARACIONES: La valoración inicial completa del paciente con esquizofrenia de forma previa a la intervención farmacológica incluye: tomo- grafía craneal, valoración neurocognitiva, electrocardiograma, medición de la altura y el peso, pruebas de detección de sustancias ilegales, perfiles lipídicos, glucemia plasmática en ayunas y prolactina, transaminasas.

FUERZA DE LA RECOMENDACIÓN:

D - Evidencia de nivel 3 o 4. Evidencia extrapolada de estudios de nivel 2+.

FUENTE/S DE INFORMACIÓN: Documentación clínica.

BIBLIOGRAFÍA:

- Falkai P, Wobrock T, Lieberman J, Glenthoj B, Gattaz WF, Möller HJ, WFSBP Task Force on Treatment Guidelines for Schizophrenia. World Federation of Societies of Biological Psychiatry (WFSBP) guidelines for biological treatment of schizophrenia, Part 1: Acute treatment of schizophrenia. World J Biol Psychiatry. 2005; 6(3):132-91.
- Falkai P, Wobrock T, Lieberman J, Glenthoj B, Gattaz WF, Möller HJ, WFSBP Task Force on Treatment Guidelines for Schizophrenia. World Federation of Societies Biological Psychiatry (WFSBP) guidelines for biological treatment of schizophrenia, Part Long-term treatment of schizophrenia. World J Biol Psychiatry. 2006;7(1):5-40.
- Grupo de Trabajo de la Guía de Práctica Clínica sobre la Esquizofrenia y el Trastorno Psicótico Incipiente. Fòrum de Salut Mental, coordinación. Guía de Práctica Clínica sobre la Esquizofrenia y el Trastorno Psicótico Incipiente. Madrid: Plan de Calidad para el Sistema Nacional de Salud del Ministerio de Sanidad y Consumo. Agència d’Avaluació de Tecnologia i Recerca Mèdiques; 2009. Guía de Práctica Clínica: AATRM. Nº 2006/05-2.
- Royal Australian and New Zealand College of Psychiatrists clinical practice guidelines for the treatment of schizophrenia and related disorders. Aust N Z J Psychiatry. 2005;39(1-2):1-30.

**CRITERIOS DE CALIDAD EN PSIQUIATRÍA**

**PROCESO/ESQ. PSICOTERAPIA DE APOYO**

**CRITERIO 2. Formulación del plan individual del tratamiento y alianza terapéutica**

DEFINICIÓN: Proporción pacientes con trastorno psicótico con los que se desarrolla la alianza terapéutica a partir de una actitud de apoyo emocional y cooperación.

FÓRMULA: Pacientes con trastorno psicótico con los que se desarrolla la alianza terapéutica a partir de una actitud de apoyo emocional y cooperación / Total de pacientes con trastorno psicótico × 100.

INDICADOR DE: Proceso.

JUSTIFICACIÓN / EXCLUSIONES / ACLARACIONES: Se recomienda desarrollar la alianza terapéutica a partir de una actitud de apoyo emocional y cooperación, ya que desempeña un importante papel en el tratamiento de las personas con esquizofrenia.

FUERZA DE LA RECOMENDACIÓN:

D - Evidencia de nivel 3 o 4. Evidencia extrapolada de estudios de nivel 2+.

FUENTE/S DE INFORMACIÓN: Documentación clínica.

BIBLIOGRAFÍA:

- Grupo de Trabajo de la Guía de Práctica Clínica sobre la Esquizofrenia y el Trastorno Psicótico Incipiente. Fòrum de Salut Mental, coordinación. Guía de Práctica Clínica sobre la Esquizofrenia y el Trastorno Psicótico Incipiente. Madrid: Plan de Calidad para el Sistema Nacional de Salud del Ministerio de Sanidad y Consumo. Agència d’Avaluació de Tecnologia i Recerca Mèdiques; 2009. Guía de Práctica Clínica: AATRM. Nº 2006/05-2.
- Insel TR. Rethinking schizophrenia. Nature. 2010;468(7321):187-93.
- Rojo E, Tabarés R. Manual práctico de cognición de la esquizofrenia y el trastorno bipolar. Madrid: Editorial Ars Médica; 2007.

**INDICADORES DE ESQUIZOFRENIA**

**PROCESO/ESQ. PRESCRIPCIÓN DE ANTIPSICÓTICOS Y EVENTOS ADVERSOS**

**CRITERIO 3. Aplicar el principio básico de producir el mínimo daño posible con la prescripción de antipsicóticos alcanzando el máximo beneficio**

DEFINICIÓN: Proporción de pacientes que reciben el tratamiento farmacológico con una introducción gradual de la medicación antipsicótica, junto con medicación antimaníaca o antidepresiva cuando estos síntomas están presentes.

FÓRMULA: Pacientes con esquizofrenia en tratamiento con antipsicóticos con introducción gradual de la medicación acompañada de explicaciones detallada / Total de pacientes tratados con antipsicóticos × 100.

INDICADOR DE: Proceso.

JUSTIFICACIÓN / EXCLUSIONES / ACLARACIONES: Los tratamientos farmacológicos deberían ser instaurados con extrema precaución en los pacientes que no se han sometido a ningún tratamiento previo, bajo el principio básico de producir el mínimo daño posible al tiempo que se alcanza el máximo beneficio. Esto significa la introducción gradual, con una explicación cuidadosa, de dosis bajas de medicación antipsicótica junto con medicación antimaníaca o antidepresiva cuando estos síndromes estén presentes.

FUERZA DE LA RECOMENDACIÓN:

A - Al menos un metanálisis, revisión sistemática de ECA, ECA de nivel 1++, directamente aplicables a la población diana, o evidencia suficiente derivada de estudios de nivel 1+, directamente aplicable a la población diana y que demuestren consistencia global en los resultados.

FUENTE/S DE INFORMACIÓN: Documentación clínica.

**CRITERIOS DE CALIDAD EN PSIQUIATRÍA**

**PROCESO/ESQ. PRESCRIPCIÓN DE ANTIPSICÓTICOS Y EVENTOS ADVERSOS**

**CRITERIO 3. Aplicar el principio básico de producir el mínimo daño posible con la prescripción de antipsicóticos alcanzando el máximo beneficio**

BIBLIOGRAFÍA:

- Falkai P, Wobrock T, Lieberman J, Glenthoj B, Gattaz WF, Möller HJ, WFSBP Task Force on Treatment Guidelines for Schizophrenia. World Federation of Societies of Biological Psychiatry (WFSBP) guidelines for biological treatment of schizophrenia, Part 1: Acute treatment of schizophrenia. World J Biol Psychiatry. 2005;6(3):132-91.
- Falkai P, Wobrock T, Lieberman J, Glenthoj B, Gattaz WF, Möller HJ, WFSBP Task Force on Treatment Guidelines for Schizophrenia. World Federation of Societies of Biological Psychiatry (WFSBP) guidelines for biological treatment of schizophrenia, Part 2: Long-term treatment of schizophrenia. World J Biol Psychiatry. 2006;7(1):5-40.
- Grupo de Trabajo de la Guía de Práctica Clínica sobre la Esquizofrenia y el Trastorno Psicótico Incipiente. Fòrum de Salut Mental, coordinación. Guía de Práctica Clínica sobre la Esquizofrenia y el Trastorno Psicótico Incipiente. Madrid: Plan de Calidad para el Sistema Nacional de Salud del Ministerio Sanidad y Consumo. Agència d’Avaluació de Tecnologia i Recer Mèdiques; 2009. Guía de Práctica Clínica: AATRM. Nº 2006/05-2.
- Royal Australian and New Zealand College of Psychiatrists clinical practice guidelines for the treatment of schizophrenia and related disorders. Aust N Z J Psychiatry. 2005;39(1-2):1-30.

**INDICADORES DE ESQUIZOFRENIA**

**PROCESO/ESQ. PRESCRIPCIÓN DE ANTIPSICÓTICOS Y EVENTOS ADVERSOS**

**CRITERIO 4. Antipsicóticos de segunda generación oral y/o de larga duración como primera línea de tratamiento en el primer episodio de psicosis**

DEFINICIÓN: Proporción de pacientes que presentan un primer episodio de psicosis a los que se prescribe medicación antipsicótica de segunda generación oral y/o de larga duración como tratamiento de primera línea.

FÓRMULA: Pacientes que presentan un primer episodio de psicosis a los que se prescribe medicación antipsicótica de segunda generación oral y/o de larga duración como tratamiento de primera línea / Total de pacientes que presentan un primer episodio de psicosis y a los que se prescribe tratamiento antipsicótico × 100.

INDICADOR DE: Proceso.

JUSTIFICACIÓN / EXCLUSIONES / ACLARACIONES: Se recomienda uso de la medicación antipsicóticos de segunda generación oral como paliperidona, risperidona, olanzapina, quetiapina, amisulprida o aripiprazol como primera línea de tratamiento en el primer episodio de psicosis. Se ha comprobado que los antipsicóticos de segunda generación son, al menos, tan eficaces como los primera generación y presentan un menor riesgo de provocar efectos adversos extrapiramidales y discinesia tardía.

La elección de la medicación antipsicótica debe realizarse por consenso entre el paciente y el profesional sanitario. Se debe proporcionar información sobre los beneficios y posibles efectos adversos de cada antipsicótico y discutirla de manera conjunta. Algunos de los efectos adversos a tener en cuenta son: metabólicos (ganancia de peso y diabetes), extrapiramidales (acatisia, discinesia y distonía), cardiovasculares (aumento del intervalo QT), hormonales (aumento de la olactina plasmática) y otros (experiencias subjetivas desagradables).

En términos generales, se recomienda utilizar la vía de administración oral y/o inyectable. Los antipsicóticos inyectables de corta duración se recomiendan en situaciones de emergencia.

Se puede recomendar ofrecer a todos los pacientes un tratamiento de larga duración en todas las fases de la enfermedad, incluyendo los casos de primer episodio si se probó antes la tolerancia oral del antipsicótico propuesto como inyectable de larga duración, recomendándolos expresamente en pacientes con baja adherencia al tratamiento.

En un reciente editorial (Carpenter *et al.*) se afirma que los tratamientos de larga duración deben ser una primera línea de tratamiento para un paciente con un primer episodio de psicosis, lo que supondría un importante avance para tratar pacientes que presentan problemas de adherencia y para los cuales un inadecuado control de los síntomas les impide la recuperación.

**CRITERIOS DE CALIDAD EN PSIQUIATRÍA**

**PROCESO/ESQ. PRESCRIPCIÓN DE ANTIPSICÓTICOS Y EVENTOS ADVERSOS**

**CRITERIO 4. Antipsicóticos de segunda generación oral y/o de larga duración como primera línea de tratamiento en el primer episodio de psicosis**

FUERZA DE LA RECOMENDACIÓN:

A - Al menos un metanálisis, revisión sistemática de ECA, o ECA de nivel 1++, directamente aplicables a la población diana, o evidencia suficiente derivada de estudios de nivel 1+, directamente aplicable a la población diana y que demuestren consistencia global en los resultados.

FUENTE/S DE INFORMACIÓN: Documentación clínica.

BIBLIOGRAFÍA:

- Carpenter WT, Buchanan RW. Expanding therapy with long-acting antipsychotic medication in patients with schizophrenia. JAMA Psychiatry. 2015;72(8):745-6.
- Grupo de Trabajo de la Guía de Práctica Clínica sobre la Esquizofrenia y el Trastorno Psicótico Incipiente. Fòrum de Salut Mental, coordinación. Guía de Práctica Clínica sobre la Esquizofrenia y el Trastorno Psicótico Incipiente. Madrid: Plan de Calidad para el Sistema Nacional de Salud del Ministerio Sanidad y Consumo. Agència d’Avaluació de Tecnologia i Recerca Mèdiques; 2009. Guía de Práctica Clínica: AATRM. Nº 2006/05-2.
- Moore TA, Covell NH, Essock SM, Miller AL. Real-world antipsychotic treatment practices. Psychiatr Clin North Am. 2007;30(3):401-16.
- NICE. Psychosis and schizophrenia in adults: prevention and management. NICE guidelines [CG178]; 2014 [citado 4 jul 2016]. Disponible en: [https://www.nice.org.uk/](http://www.nice.org.uk/) guidance/cg178 [NICE guideline].
- Nussbaum A, Stroup T. Paliperidona oral para la esquizofrenia. Cochrane Database of Systematic Reviews 2012 Issue Art. Nº: CD006369. doi: 10.1002/14651858. CD006369.
- Royal Australian and New Zealand College of Psychiatrists clinical practice guidelines for the treatment of schizophrenia and related disorders. Aust N Z J Psychiatry. 2005;39(1-2):1-30.
- Schreiner A, Aadamsoo K, Altamura AC, et al. Paliperidone palmitate versus oral antipsychotics in recently diagnosed schizophrenia. Schizophr Res. 2015;169:393-9.

**INDICADORES DE ESQUIZOFRENIA**

**PROCESO/ESQ. ASPECTOS TÉCNICOS DE LA PRESCRIPCIÓN**

**CRITERIO 5. Mantenimiento de la farmacoterapia en las fases estable y de estabilización tras un primer episodio de psicosis**

DEFINICIÓN: Proporción de pacientes que han experimentado un primer episodio de psicosis en los que se mantiene la farmacoterapia (medicación antipsicótica) durante un mínimo de 2 años después de la primera recuperación de los síntomas para la prevención de recaídas durante las fases estable y de estabilización.

FÓRMULA: Pacientes que han experimentado un primer episodio de psicosis en los que se mantiene la farmacoterapia (medicación antipsicótica) durante un mínimo de 2 años después de la primera recuperación de los síntomas para la prevención de recaídas durante las fases estable y de estabilización / Total de pacientes que han experimentado un primer episodio de psicosis y tras el tratamiento del mismo han experimentado una recuperación de los síntomas × 100.

INDICADOR DE: Proceso.

JUSTIFICACIÓN / EXCLUSIONES / ACLARACIONES: Se recomienda el mantenimiento de la farmacoterapia para la prevención recaídas en las fases estable y de estabilización, con dosis siempre dentro del intervalo de tratamiento recomendado para los antipsicóticos de segunda generación. La medicación antipsicótica para el tratamiento de un primer episodio de psicosis debería mantenerse durante un mínimo de 2 años después de la primera recuperación de los síntomas.

FUERZA DE LA RECOMENDACIÓN:

B - Evidencia suficiente derivada de estudios de nivel 2++, directamente aplicable a la población diana y que demuestren consistencia global en los resultados. Evidencia extrapolada de estudios de nivel 1++ o 1+.

FUENTE/S DE INFORMACIÓN: Documentación clínica.

**CRITERIOS DE CALIDAD EN PSIQUIATRÍA**

**PROCESO/ESQ. ASPECTOS TÉCNICOS DE LA PRESCRIPCIÓN**

**CRITERIO 5. Mantenimiento de la farmacoterapia en las fases estable y de estabilización tras un primer episodio de psicosis**

BIBLIOGRAFÍA:

- Falkai P, Wobrock T, Lieberman J, Glenthoj B, Gattaz WF, Möller HJ, WFSBP Task Force on Treatment Guidelines for Schizophrenia. World Federation of Societies of Biological Psychiatry (WFSBP) guidelines for biological treatment of schizophrenia, Part 1: Acute treatment of schizophrenia. World Biol Psychiatry. 2005;6(3):132-91.
- Falkai P, Wobrock T, Lieberman J, Glenthoj B, Gattaz WF, Möller HJ, WFSBP Task Force on Treatment Guidelines for Schizophrenia. World Federation of Societies of Biological Psychiatry (WFSBP) guidelines for biological treatment of schizophrenia, Part 2: Long-term treatment of schizophrenia. World J Biol Psychiatry. 2006;7(1):5-40.
- Grupo de Trabajo de la Guía de Práctica Clínica sobre la Esquizofrenia y el Trastorno Psicótico Incipiente. Fòrum de Salut Mental, coordinación. Guía de Práctica Clínica sobre la Esquizofrenia y el Trastorno Psicótico Incipiente. Madrid: Plan de Calidad para

el Sistema Nacional de Salud del Ministerio de Sanidad y Consumo. Agència d’Avaluació de Tecnología i Recerca Mèdiques; 2009. Guía de Práctica Clínica: AATRM. Nº 2006/05-2

- Moore TA, Covell NH, Essock SM, Miller AL. Real-world antipsychotic treatment practices. Psychiatr Clin North Am. 2007;30(3):401-16.
- Nussbaum A, Stroup T. Paliperidona oral para la esquizofrenia. Cochrane Database of Systematic Reviews 2012 Issue 5. Art. No.: CD006369. doi: 10.1002/14651858. CD006369.
- Royal Australian and New Zealand College of Psychiatrists clinical practice guidelines for the treatment of schizophrenia and related disorders. Aust N Z J Psychiatry. 2005;39(1-2):1-30.

**INDICADORES DE ESQUIZOFRENIA**

**PROCESO/ESQ. ASPECTOS TÉCNICOS DE LA PRESCRIPCIÓN**

**CRITERIO 6. Evitar la administración de múltiples medicamentos antipsicóticos**

DEFINICIÓN: Proporción de pacientes que han experimentado un episodio psicótico a los que se administran múltiples medicamentos antipsicóticos.

FÓRMULA: Pacientes que han experimentado un episodio psicótico a los que se administran múltiples medicamentos antipsicóticos / Total de pacientes en tratamiento con fármacos antipsicóticos × 100.

INDICADOR DE: Proceso.

JUSTIFICACIÓN / EXCLUSIONES / ACLARACIONES: La administración de múltiples medicamentos, de más de dos antipsicóticos, o la combinación de fármacos de primera generación y de segunda, no debería utilizarse excepto durante los periodos de transición de un cambio de medicación. Existen estudios que demostraron una superioridad significativa para la monoterapia frente a la politerapia en la mayoría de los antipsicóticos de segunda generación (tratamientos de larga duración). En otro estudio también se afirma que las combinaciones de antipsicóticos pueden suponer un riesgo elevado de sufrir efectos adversos neurocognitivos.

FUERZA DE LA RECOMENDACIÓN:

B - Evidencia suficiente derivada de estudios de nivel 2++, directamente aplicable a la población diana y que demuestren consistencia global los resultados. Evidencia extrapolada de estudios de nivel 1++ o 1+.

FUENTE/S DE INFORMACIÓN: Documentación clínica.

**CRITERIOS DE CALIDAD EN PSIQUIATRÍA**

**PROCESO/ESQ. ASPECTOS TÉCNICOS DE LA PRESCRIPCIÓN**

**CRITERIO 6. Evitar la administración de múltiples medicamentos antipsicóticos**

BIBLIOGRAFÍA:

- Bernardo M, Coma A, Ibáñez C, Zara C, Bari JM, Serrano-Blanco A. Antipsychotic polypharmacy in regional health service: a population-based study. BMC Psychiatry. 2012;12:42.
- Falkai P, Wobrock T, Lieberman J, Glenthoj B, Gattaz WF, Möller HJ, WFSBP Task Force on Treatment Guidelines for Schizophrenia. World Federation of Societies of Biological Psychiatry (WFSBP) guidelines for biological treatment of schizophrenia, Part 1: Acute treatment of schizophrenia. World J Biol Psychiatry. 2005;6(3):132-91.
- Falkai P, Wobrock T, Lieberman J, Glenthoj B, Gattaz WF, Möller HJ, WFSBP Task Force on Treatment Guidelines for Schizophrenia. World Federation of Societies of Biological Psychiatry (WFSBP) guidelines for biological treatment of schizophrenia, Part 2: Long-term treatment of schizophrenia. World J Biol Psychiatry. 2006;7(1):5-40.
- Goodwin G, Fleischhacker W, Arango C, et al. Advantages and disadvantages of combination treatment with antipsychotics ECNP Consensus Meeting, March 2008, Nice. Eur Neuropsychopharmacol. 2009;19:520-32.
- Grupo de Trabajo de la Guía de Práctica Clínica sobre la Esquizofrenia y el Trastorno Psicótico Incipiente. Fòrum de Salut Mental, coordinación. Guía de Práctica Clínica sobre la Esquizofrenia y el Trastorno Psicótico Incipiente. Madrid: Plan de Calidad para el Sistema Nacional de Salud del Ministerio de Sanidad y Consumo. Agència d’Avaluació de Tecnologia i Recerca Mèdiques; 2009. Guía de Práctica Clínica: AATRM. Nº 2006/05-2.
- Katona Czobor P, Bitter I. Real-world effectiveness of antipsychotic monotherapy vs. polypharmacy in schizophrenia: to switch or to combine? A nationwide study in Hungary. Schizophr Res. 2014;152:246-54.
- Moore TA, Covell NH, Essock SM, Miller AL. Real-world antipsychotic treatment practices. Psychiatr Clin North Am. 2007;30(3):401-16.
- Royal Australian and New Zealand College of Psychiatrists clinical practice guidelines for the treatment of schizophrenia and related disorders. Aust N Z J Psychiatry. 2005;39(1-2):1-30.

**INDICADORES DE ESQUIZOFRENIA**

__________________________________________________________________________________

**PROCESO/ESQ. ASPECTOS TÉCNICOS DE LA PRESCRIPCIÓN**

**CRITERIO 7. Tratamientos de larga duración prescritos por clínicos para pacientes con tratamiento antipsicótico**

DEFINICIÓN: Proporción de pacientes con trastorno psicótico a los que se administra medicación de larga duración por prescripción.

FÓRMULA: Pacientes con trastorno psicótico a los que se administra medicación de larga duración por prescripción / Total de pacientes con trastorno psicótico × 100.

INDICADOR DE: Proceso.

JUSTIFICACIÓN / EXCLUSIONES / ACLARACIONES: La medicación de larga duración se usa preferentemente en dos situaciones. En primer lugar, para aquellos que optan clara y voluntariamente por esta vía de administración. Los medicamentos de larga duración de segunda generación son preferibles debido a su mejor tolerabilidad y un menor riesgo de discinesia tardía. En segundo lugar, para aquellos que, a pesar de una serie de intervenciones psicosociales integrales destinadas a promover la adaptación y la adherencia, repetidamente fracasan en adherirse a la medicación necesaria y presentan recaídas frecuentes. Esto resulta aún más necesario cuando las consecuencias de las recaídas son graves e implican un riesgo sustancial tanto para el paciente como para otros. Periodos prolongados sin recaídas pueden estar asociados a ciertos efectos protectores en la integridad cerebral en la esquizofrenia. Un intervalo de dosificación extendido puede ser particularmente útil para determinados pacientes que están en riesgo de recaer debido a una no adherencia total o parcial al tratamiento, así como para sus cuidadores. Existen estudios que afirman que los tratamientos de larga duración están infrautilizados y que estas medicaciones deberían ser consideradas como una primera opción terapéutica en los pacientes en fases iniciales.

FUERZA DE LA RECOMENDACIÓN:

C - Evidencia suficiente derivada de estudios de nivel 2+, directamente aplicable a población diana y que demuestren consistencia global en los resultados. Evidencia extrapolada de estudios de nivel 2++.

D - Evidencia de nivel 3 o 4. Evidencia extrapolada de estudios de nivel 2+.

FUENTE/S DE INFORMACIÓN: Documentación clínica.

**CRITERIOS DE CALIDAD EN PSIQUIATRÍA**

**PROCESO/ESQ. ASPECTOS TÉCNICOS DE LA PRESCRIPCIÓN**

**CRITERIO 7. Tratamientos de larga duración prescritos por clínicos para pacientes con tratamiento antipsicótico**

BIBLIOGRAFÍA:

- American Psychiatric Association. Practice guideline for the treatment of patients with schizophrenia. Am J Psychiatry. 1997;154(4 Suppl):1-63.
- Bernardo M, Bioque M. Three-month paliperidone palmitate – A new treatment option for schizophrenia. Expert Rev Clin Pharmacol. 2016;9:899-904.
- Carpenter WT, Buchanan RW. Expanding therapy with long-acting antipsychotic medication in patients with schizophrenia. JAMA Psychiatry. 2015;72(8):745-6.
- Grupo de Trabajo de la Guía de Práctica Clínica sobre la Esquizofrenia y el Trastorno Psicótico Incipiente. Fòrum de Salut Mental, coordinación. Guía de Práctica Clínica sobre la Esquizofrenia y el Trastorno Psicótico Incipiente. Madrid: Plan de Calidad para el Sistema Nacional de Salud del Ministerio de Sanidad y Consumo. Agència d’Avaluació de Tecnologia i Recerca Mèdiques; 2009. Guía de Práctica Clínica: AATRM. Nº 2006/05-2.
- Royal Australian and New Zealand College Psychiatrists clinical practice guidelines for the treatment of schizophrenia and related disorders. Aust N Z J Psychiatry. 2005;39(1-2):1-30.
- Schreiner A, Aadamsoo K, Altamura AC, et al. Paliperidone palmitate versus oral antipsychotics in recently diagnosed schizophrenia. Schizophr Res. 2015;169:393-9.

**INDICADORES DE ESQUIZOFRENIA**

**PROCESO/ESQ. RESISTENCIA AL TRATAMIENTO ANTIPSICÓTICO**

**CRITERIO 8. Uso de clozapina como tratamiento alternativo en caso de resistencia al tratamiento o ante la falta de respuesta al tratamiento con dos tipos diferentes de antipsicóticos**

DEFINICIÓN: Proporción de pacientes con trastorno psicótico que presentan resistencia al tratamiento con medicación antipsicótica o falta de respuesta al tratamiento con dos antipsicóticos diferentes a los que se administra clozapina.

FÓRMULA: Pacientes con trastorno psicótico que presentan resistencia al tratamiento con medicación antipsicótica o falta de respuesta al tratamiento con dos antipsicóticos diferentes a los que se administra clozapina con una adherencia al tratamiento contrastada / Total de pacientes con trastorno psicótico que cumplen con los criterios descritos × 100.

INDICADOR DE: Proceso.

JUSTIFICACIÓN / EXCLUSIONES / ACLARACIONES: La clozapina debe ser introducida con garantías de seguridad en la primera ocasión en caso de resistencia al tratamiento. Ante la falta de respuesta al tratamiento con una administración cierta y adecuada de antipsicóticos de dos tipos diferentes, recomienda uso de clozapina.

FUERZA DE LA RECOMENDACIÓN:

A - Al menos un metanálisis, revisión sistemática de ECA, o ECA de nivel 1++, directamente aplicables a la población diana, o evidencia suficiente derivada de estudios de nivel 1+, directamente aplicable a la población diana y que demuestren consistencia global en los resultados.

FUENTE/S DE INFORMACIÓN: Documentación clínica.

**CRITERIOS DE CALIDAD EN PSIQUIATRÍA**

**PROCESO/ESQ. RESISTENCIA AL TRATAMIENTO ANTIPSICÓTICO**

**CRITERIO 8. Uso de clozapina como tratamiento alternativo en caso de resistencia al tratamiento o ante la falta de respuesta al tratamiento con dos tipos diferentes de antipsicóticos**

BIBLIOGRAFÍA:

- Clinical practice guidelines. Treatment of schizophrenia. Can J Psychiatry. 2005;50(13 Suppl 1):7S-57S.
- Falkai P, Wobrock T, Lieberman J, Glenthoj B, Gattaz WF, Möller HJ, WFSBP Task Force on Treatment Guidelines for Schizophrenia. World Federation of Societies of Biological Psychiatry (WFSBP) guidelines for biological treatment of schizophrenia, Part 1: Acute treatment of schizophrenia. World J Biol Psychiatry. 2005;6(3):132-91.
- Falkai P, Wobrock Lieberman J, Glenthoj B, Gattaz WF, Möller HJ, WFSBP Task Force on Treatment Guidelines for Schizophrenia. World Federation of Societies of Biological Psychiatry (WFSBP) guidelines for biological treatment of schizophrenia, Part 2: Long-term treatment of schizophrenia. World J Biol Psychiatry. 2006;7(1): 5-40.
- Grupo de Trabajo de la Guía de Práctica Clínica sobre la Esquizofrenia y el Trastorno Psicótico Incipiente. Fòrum Salut Mental, coordinación. Guía de Práctica Clínica sobre la Esquizofrenia y el Trastorno Psicótico Incipiente. Madrid: Plan de Calidad para el Sistema Nacional de Salud del Ministerio Sanidad y Consumo. Agència d’Avaluació de Tecnologia i Recer Mèdiques; 2009. Guía de Práctica Clínica: AATRM. Nº 2006/05-2.
- Lewis S, Lieberman J. CATIE and CUtLASS: can we handle the truth? Br J Psychiatry. 2008;192(3):161-3.
- Moore TA, Covell NH, Essock SM, Miller AL. Real-world antipsychotic treatment practices. Psychiatr Clin North Am. 2007;30(3):401-16.
- Raja M, Raja S. Clozapine safety, 40 years later. Curr Drug Saf. 2014;9(3):163-95.
- Royal Australian and New Zealand College of Psychiatrists clinical practice guidelines for the treatment of schizophrenia and related disorders. Aust N Z J Psychiatry. 2005;39(1-2):1-30.

**INDICADORES DE ESQUIZOFRENIA**

**PROCESO/ESQ. RESISTENCIA AL TRATAMIENTO ANTIPSICÓTICO**

**CRITERIO 9. Uso de clozapina en pacientes con riesgo de suicidio que no responden al tratamiento con antidepresivos**

DEFINICIÓN: Proporción de pacientes con trastorno psicótico y riesgo de suicidio que no responden al tratamiento con antidepresivos y a los que se proporciona clozapina de forma inmediata.

FÓRMULA: Pacientes con trastorno psicótico y riesgo de suicidio que no responden al tratamiento con antidepresivos y a los que se proporciona clozapina de forma inmediata / Total de pacientes con trastorno psicótico y riesgo de suicidio que no responden al trata- miento con antidepresivos × 100.

INDICADOR DE: Proceso.

JUSTIFICACIÓN / EXCLUSIONES / ACLARACIONES: Si el riesgo de suicidio es elevado o persistente a pesar del tratamiento para la DM, si tal tratamiento resulta ineficaz, o si DM no es grave, debería contemplarse el uso inmediato de la clozapina.

FUERZA DE LA RECOMENDACIÓN:

A - Al menos un metanálisis, revisión sistemática de ECA, o ECA de nivel 1++, directa- mente aplicables a la población diana, evidencia suficiente derivada de estudios de nivel 1+, directamente aplicable a la población diana y que demuestren consistencia global en los resultados.

FUENTE/S DE INFORMACIÓN: Documentación clínica.

**CRITERIOS DE CALIDAD EN PSIQUIATRÍA**

**PROCESO/ESQ. RESISTENCIA AL TRATAMIENTO ANTIPSICÓTICO**

**CRITERIO 9. Uso de clozapina en pacientes con riesgo de suicidio que no responden al tratamiento con antidepresivos**

BIBLIOGRAFÍA:

- Agid O, Foussias G, Singh S, Remington G. Where to position clozapine: re-examining the evidence. Can J Psychiatry. 2010;55(10):677-84.
- Clinical practice guidelines. Treatment of schizophrenia. Can J Psychiatry. 2005;50(13 Suppl 1):7S-57S.
- Falkai P, Wobrock T, Lieberman J, Glenthoj B, Gattaz WF, Möller HJ, WFSBP Task Force on Treatment Guidelines for Schizophrenia. World Federation of Societies of Biological Psychiatry (WFSBP) guidelines for biological treatment of schizophrenia, Part 1: Acute treatment of schizophrenia. World Biol Psychiatry. 2005;6(3):132-91.
- Falkai P, Wobrock T, Lieberman J, Glenthoj Gattaz WF, Möller HJ, WFSBP Task Force on Treatment Guidelines for Schizophrenia. World Federation of Societies of Biological Psychiatry (WFSBP) guidelines for biological treatment of schizophrenia, Part 2: Long-term treatment of schizophrenia. World J Biol Psychiatry. 2006;7(1):5-40.
- Grupo de Trabajo de la Guía de Práctica Clínica sobre la Esquizofrenia y el Trastorno Psicótico Incipiente. Fòrum de Salut Mental, coordinación. Guía de Práctica Clínica sobre la Esquizofrenia y el Trastorno Psicótico Incipiente. Madrid: Plan de Calidad para el Sistema Nacional de Salud del Ministerio Sanidad y Consumo. Agència d’Avaluació de Tecnologia i Recerca Mèdiques; 2009. Guía de Práctica Clínica: AATRM. Nº 2006/05-2.
- Hasan A, Falkai P, Wobrock T, Lieberman et al., WFSBP Task Force on Treatment Guidelines for Schizophrenia. World Federation of Societies of Biological Psychiatry (WFSBP) guidelines for biological treatment of schizophrenia. Part 3: Update 2015 Management of special circumstances: Depression, Suicidality, substance use disorders and pregnancy and lactation. World J Biol Psychiatry. 2015;16(3):142-70.
- Lewis S, Lieberman J. CATIE and CUtLASS: can we handle the truth? Br J Psychiatry. 2008;192(3):161-3.
- Moore TA, Covell NH, Essock SM, Miller AL. Real-world antipsychotic treatment practices. Psychiatr Clin North Am. 2007;30(3):401-16.
- Petrides G, Malur C, Braga et al. Electroconvulsive therapy augmentation in clozapine-resistant schizophrenia: a prospective, randomized study. Am J Psychiatry. 2015;172(1):52-8.
- Raja M, Raja S. Clozapine safety, 40 years later. Curr Drug Saf. 2014;9(3):163-95.
- Royal Australian and New Zealand College of Psychiatrists clinical practice guidelines for the treatment of schizophrenia and related disorders. Aust N Z J Psychiatry. 2005;39(1-2):1-30.

**INDICADORES DE ESQUIZOFRENIA**

## PROCESO/ESQ. PRESCRIPCIÓN DE ANTIPSICÓTICOS Y EVENTOS ADVERSOS

**CRITERIO 10. Manejo de la manía y de la DM grave en pacientes con un primer episodio psicótico**

DEFINICIÓN: Proporción de pacientes con un primer episodio psicótico que presentan manía o DM grave a los que se prescriben estabilizadores del humor y/o antidepresivos.

FÓRMULA: Pacientes con un primer episodio psicótico que presentan manía o DM grave a los que se prescriben estabilizadores del humor y/o antidepresivos / Total de pacientes con un primer episodio psicótico que presentan manía o DM grave × 100.

INDICADOR DE: Proceso.

JUSTIFICACIÓN / EXCLUSIONES / ACLARACIONES: En pacientes que presentan un primer episodio psicótico, los síntomas como la manía y la DM grave requieren de tratamiento específico con estabilizadores del humor y antidepresivos.

FUERZA DE LA RECOMENDACIÓN:

A - Al menos un metanálisis, revisión sistemática de ECA, o ECA de nivel 1++, directamente aplicables a la población diana, o evidencia suficiente derivada de estudios de nivel 1+, directamente aplicable a la población diana y que demuestren consistencia global en los resultados.

FUENTE/S DE INFORMACIÓN: Documentación clínica.

BIBLIOGRAFÍA:

- Grupo de Trabajo de la Guía de Práctica Clínica sobre la Esquizofrenia y el Trastorno Psicótico Incipiente. Fòrum de Salut Mental, coordinación. Guía de Práctica Clínica sobre la Esquizofrenia y el Trastorno Psicótico Incipiente. Madrid: Plan de Calidad para el Sistema Nacional de Salud del Ministerio de Sanidad y Consumo. Agència d’Avaluació de Tecnologia i Recerca Mèdiques; 2009. Guía de Práctica Clínica: AATRM. Nº 2006/05-2.
- Royal Australian and New Zealand College of Psychiatrists clinical practice guidelines for the treatment of schizophrenia and related disorders. Aust N Z J Psychiatry. 2005;39(1-2):1-30.

**CRITERIOS DE CALIDAD EN PSIQUIATRÍA**

**PROCESO/ESQ. ASPECTOS GENERALES**

**CRITERIO 11. Medidas de peso e índice de masa corporal al inicio del tratamiento, después mensualmente durante 6 meses y posteriormente cada 3 meses**

DEFINICIÓN: Proporción de pacientes que tienen control de peso e índice de masa corporal cuando se les ha prescrito medicación antipsicótica.

FÓRMULA: Pacientes con esquizofrenia en tratamiento con antipsicóticos con control de peso e índice de masa corporal al inicio del tratamiento, mensualmente durante 6 meses y posteriormente durante 3 meses / Total de pacientes tratados con antipsicóticos × 100.

INDICADOR DE: Proceso.

JUSTIFICACIÓN / EXCLUSIONES / ACLARACIONES: El peso y el índice de masa corporal deben ser medidos al inicio del tratamiento, después mensualmente durante 6 meses y, a partir de entonces, cada 3 meses. La consulta con un dietista es aconsejable así como el fomentar la realización de ejercicio físico regular. También podría ser necesario considerar una medicación con un menor riesgo de incremento de peso. En uno de los últimos estudios comparativos entre antipsicóticos se observó que la paliperidona era el fármaco que presentó una menor probabilidad de aumento de peso. Deberían tratarse con el paciente los pros y los contras, y proporcionarle apoyo psicosocial.

FUERZA DE LA RECOMENDACIÓN:

D - Evidencia de nivel 3 o 4. Evidencia extrapolada de estudios de nivel 2+.

FUENTE/S DE INFORMACIÓN: Documentación clínica.

**INDICADORES DE ESQUIZOFRENIA**

**PROCESO/ESQ. ASPECTOS GENERALES**

**CRITERIO 11. Medidas de peso e índice de masa corporal al inicio del tratamiento, después mensualmente durante 6 meses y posteriormente cada 3 meses**

BIBLIOGRAFÍA:

- Falkai P, Wobrock T, Lieberman J, Glenthoj B, Gattaz WF, Möller HJ, WFSBP Task Force on Treatment Guidelines for Schizophrenia. World Federation of Societies of Biological Psychiatry (WFSBP) guidelines for biological treatment of schizophrenia, Part 1: Acute treatment of schizophrenia. World Biol Psychiatry. 2005;6(3):132-91.
- Falkai P, Wobrock T, Lieberman J, Glenthoj B, Gattaz WF, Möller HJ, WFSBP Task Force on Treatment Guidelines for Schizophrenia. World Federation of Societies of Biological Psychiatry (WFSBP) guidelines for biological treatment of schizophrenia, Part 2: Long-term treatment of schizophrenia. World J Biol Psychiatry. 2006;7(1):5-40.
- Grupo de Trabajo de la Guía de Práctica Clínica sobre la Esquizofrenia y el Trastorno Psicótico Incipiente. Fòrum de Salut Mental, coordinación. Guía de Práctica Clínica sobre la Esquizofrenia y el Trastorno Psicótico Incipiente. Madrid: Plan de Calidad para el Sistema Nacional de Salud del Ministerio de Sanidad y Consumo. Agència d’Avaluació de Tecnologia i Recerca Mèdiques; 2009. Guía de Práctica Clínica: AATRM. Nº 2006/05-2.
- Jones MP, Nicholl D, Trakas K. Efficacy and tolerability of paliperidone ER and other oral atypical antipsychotics in schizophrenia. Int J Clin Pharmacol Ther. 2010;48:383-99.
- Saiz Ruiz J, Bobes García J, Vallejo Ruiloba J, Giner Ubago J, García-Portilla González MP, Grupo de Trabajo sobre la Salud Física del Paciente con Esquizofrenia. Consensus on physical health of patients with schizophrenia from the Spanish Societies of Psychiatry and Biological Psychiatry. Actas Esp Psiquiatr. 2008;36(5):251-64.
- Royal Australian and New Zealand College of Psychiatrists clinical practice guidelines for the treatment of schizophrenia and related disorders. Aust N Z J Psychiatry. 2005;39(1-2):1-30.

**CRITERIOS DE CALIDAD EN PSIQUIATRÍA**

**PROCESO/ESQ. ASPECTOS GENERALES**

**CRITERIO 12. Medidas de la glucemia plasmática en ayunas y de los perfiles lipídicos en población de riesgo cardiovascular**

DEFINICIÓN: Proporción de pacientes con riesgo cardiovascular que tienen control de la glucemia plasmática en ayunas y perfiles lipídicos cuando se les ha prescrito medicación antipsicótica.

FÓRMULA: Pacientes con esquizofrenia y riesgo cardiovascular en tratamiento con antipsicóticos con control de la glucemia plasmática en ayunas y perfiles lipídicos medidos al inicio, así como a intervalos regulares durante el curso del tratamiento / Total de pacientes con riesgo cardiovascular y tratados con antipsicóticos × 100.

INDICADOR DE: Proceso

JUSTIFICACIÓN / EXCLUSIONES / ACLARACIONES: La glucemia plasmática en ayunas y los perfiles lipídicos deberían medirse al inicio, así como a intervalos regulares durante su curso al menos anualmente.

FUERZA DE LA RECOMENDACIÓN:

D - Evidencia de nivel 3 o 4. Evidencia extrapolada de estudios de nivel 2+.

FUENTE/S DE INFORMACIÓN: Documentación clínica.

**INDICADORES DE ESQUIZOFRENIA**

**PROCESO/ESQ. ASPECTOS GENERALES**

**CRITERIO 12. Medidas de la glucemia plasmática en ayunas y de los perfiles lipídicos en población de riesgo cardiovascular**

BIBLIOGRAFÍA:

- Bernardo M, Safont G, Oliveira C. Recomendaciones para la monitorización y promoción de la salud física en el paciente con esquizofrenia y otros trastornos mentales graves. Departament de Salut; 2014.
- Falkai P, Wobrock T, Lieberman J, Glenthoj Gattaz WF, Möller HJ, WFSBP Task Force on Treatment Guidelines for Schizophrenia. World Federation of Societies of Biological Psychiatry (WFSBP) guidelines for biological treatment of schizophrenia, Part 1: Acute treatment of schizophrenia. World J Biol Psychiatry. 2005;6(3):132-91.
- Falkai P, Wobrock T, Lieberman J, Glenthoj B, Gattaz WF, Möller HJ, WFSBP Task Force on Treatment Guidelines for Schizophrenia. World Federation of Societies of Biological Psychiatry (WFSBP) guidelines for biological treatment of schizophrenia, Part 2: Long-term treatment of schizophrenia. World J Biol Psychiatry. 2006;7(1):5-40.
- Grupo de Trabajo de la Guía de Práctica Clínica sobre la Esquizofrenia y el Trastorno Psicótico Incipiente. Fòrum de Salut Mental, coordinación. Guía de Práctica Clínica sobre la Esquizofrenia y el Trastorno Psicótico Incipiente. Madrid: Plan de Calidad para el Sistema Nacional de Salud del Ministerio de Sanidad y Consumo. Agència d’Avaluació de Tecnologia i Recerca Mèdiques; 2009. Guía de Práctica Clínica: AATRM. Nº 2006/05-2.
- Saiz Ruiz J, Bobes García J, Vallejo Ruiloba J, Giner Ubago J, García-Portilla González MP, Grupo de Trabajo sobre la Salud Física del Paciente con Esquizofrenia. Consensus on physical health of patients with schizophrenia from the Spanish Societies of Psychiatry and Biological Psychiatry. Actas Esp Psiquiatr. 2008;36(5):251-64.
- Royal Australian and New Zealand College of Psychiatrists clinical practice guidelines for the treatment of schizophrenia and related disorders. Aust N Z J Psychiatry. 2005;39(1-2):1-30.

**CRITERIOS DE CALIDAD EN PSIQUIATRÍA**

**PROCESO/ESQ. PROGRAMAS DE PRIMEROS EPISODIOS**

**CRITERIO 13. Gestión intensiva de casos y servicios de apoyo comunitarios para pacientes con esquizofrenia de inicio precoz**

DEFINICIÓN: Proporción de pacientes con esquizofrenia de inicio precoz (anterior a los 18 años) a los que se aplica gestión intensiva de casos y se les proporcionan servicios de apoyo comunitarios además de psicofármacos y psicoterapia.

FÓRMULA: Pacientes con esquizofrenia de inicio precoz (anterior a los 18 años) a los que se aplica gestión intensiva de casos y se les proporcionan servicios de apoyo comunitarios además de psicofármacos y psicoterapia / Total de pacientes con esquizofrenia de inicio precoz x100.

INDICADOR DE: Proceso

JUSTIFICACIÓN / EXCLUSIONES / ACLARACIONES: Se recomienda la gestión intensiva casos y los servicios de apoyo comunitarios, además de la administración de psicofármacos y psicoterapia, para pacientes que presentan esquizofrenia de inicio precoz (anterior a los 18 años).

FUERZA DE LA RECOMENDACIÓN:

D - Evidencia de nivel 3 o 4. Evidencia extrapolada de estudios de nivel 2+.

FUENTE/S DE INFORMACIÓN: Documentación clínica.

BIBLIOGRAFÍA:

- Dixon LB, Goldman HH, Bennett ME, et al. Implementing coordinated specialty care for early psychosis: the raise connection program. Psychiatr Serv. 2015;66(7):691-8.
- Grupo de Trabajo de la Guía de Práctica Clínica sobre la Esquizofrenia y el Trastorno Psicótico Incipiente. Fòrum de Salut Mental, coordinación. Guía de Práctica Clínica sobre la Esquizofrenia y el Trastorno Psicótico Incipiente. Madrid: Plan de Calidad para el Sistema Nacional de Salud del Ministerio de Sanidad y Consumo. Agència d’Avaluació de Tecnologia i Recerca Mèdiques; 2009. Guía de Práctica Clínica: AATRM. Nº 2006/05-2.
- Insel TR. RAISE-ing Our Expectations for First-Episode Psychosis. Am J Psychiatry. 2016;173:311-2.
- Kane JM, Robinson DG, Schooler NR, et al. Comprehensive versus usual community care for first-episode psychosis: 2-year outcomes from the NIMH RAISE Early Treatment Program. Am J Psychiatry. 2016;173:362-72.
- Ojeda N, Peña J, Segarra R, et al. La predicción del diagnóstico de esquizofrenia: El rol de la neurocognición en el primer episodio de psicosis. Bilbao: Editorial Universidad de Deusto; 2009.

**INDICADORES DE ESQUIZOFRENIA**

**PROCESO/ESQ. ENTRENAMIENTO EN HABILIDADES SOCIALES**

**CRITERIO 14. Actividades de la vida diaria (AVD y habilidades sociales)**

DEFINICIÓN: Proporción de pacientes con esquizofrenia y dificultades en el funcionamiento cotidiano a los que se proporciona entrenamiento en habilidades sociales y en AVD, apoyo en la búsqueda de empleo y en la inserción laboral.

FÓRMULA: Pacientes con esquizofrenia y dificultades en el funcionamiento cotidiano a los que se proporciona entrenamiento en habilidades sociales y en AVD, apoyo en la búsqueda de empleo y en la inserción laboral / Total de pacientes con esquizofrenia y dificultades en el funcionamiento cotidiano × 100.

INDICADOR DE: Proceso.

JUSTIFICACIÓN / EXCLUSIONES / ACLARACIONES: El entrenamiento en habilidades sociales debe estar disponible para pacientes con dificultades y/o estrés y ansiedad relacionadas con la interacción social. El entrenamiento en las AVD, basado en la evidencia científica, debería estar disponible para pacientes que tienen dificultades con las tareas de funcionamiento cotidiano. Se recomienda alentar a las personas con esquizofrenia a encontrar un puesto de trabajo. Los especialistas en Salud Mental deberían facilitarlo activamente y los programas específicos que incorporen esta intervención necesitarían ser ampliamente establecidos. Se recomiendan los programas de trabajo con apoyo para la inserción laboral de personas con esquizofrenia, ya que se obtienen mejores resultados en comparación con el resto de intervenciones de rehabilitación laboral.

FUERZA DE LA RECOMENDACIÓN:

A - Al menos un metanálisis, revisión sistemática de ECA, o ECA de nivel 1++, directamente aplicables a la población diana, o evidencia suficiente derivada de estudios de nivel 1+, directamente aplicable a la población diana y que demuestren consistencia global en los resultados.

FUENTE/S DE INFORMACIÓN: Documentación clínica.

**CRITERIOS DE CALIDAD EN PSIQUIATRÍA**

**PROCESO/ESQ. ENTRENAMIENTO EN HABILIDADES SOCIALES**

**CRITERIO 14. Actividades de la vida diaria (AVD y habilidades sociales)**

BIBLIOGRAFÍA:

- Clinical practice guidelines. Treatment of schizophrenia. Can J Psychiatry. 2005;50(13 Suppl 1):7S-57S.
- Grupo de Trabajo de la Guía de Práctica Clínica sobre la Esquizofrenia y el Trastorno Psicótico Incipiente. Fòrum de Salut Mental, coordinación. Guía de Práctica Clínica sobre la Esquizofrenia y el Trastorno Psicótico Incipiente. Madrid: Plan de Calidad para el Sistema Nacional de Salud del Ministerio de Sanidad y Consumo. Agència d’Avaluació de Tecnologia i Recerca Mèdiques; 2009. Guía de Práctica Clínica: AATRM. 2006/05-2.
- Killackey EJ, Jackson HJ, Gleeson J, Hickie IB, McGorry PD. Exciting career opportunity beckons! Early intervention and vocational rehabilitation in first-episode psychosis: employing cautious optimism. Aust N Z J Psychiatry. 2006;40(11-12):951-62.
- Modelo de atención a personas con enfermedad mental grave. Documento de consenso. Madrid: IMSERSO. Ministerio de Trabajo y Asuntos Sociales; 2006.
- Pastor A, Blanco A, Navarro Manual de rehabilitación del trastorno mental grave. Madrid: Editorial Síntesis; 2010.
- Royal Australian and New Zealand College Psychiatrists clinical practice guidelines for the treatment of schizophrenia and related disorders. Aust N Z J Psychiatry. 2005;39(1-2):1-30.
- Twamley EW Jeste DV, Lehman AF. Vocational rehabilitation in schizophrenia and other psychotic disorders: a literature review and meta-analysis of randomized controlled trials. J Nerv Ment Dis. 2003;191(8):515-23.

**INDICADORES DE ESQUIZOFRENIA**

**PROCESO/ESQ. REHABILITACIÓN COGNITIVA**

**CRITERIO 15. Terapia de rehabilitación cognitiva como técnica de mejora del funcionamiento cognitivo**

DEFINICIÓN: Proporción de pacientes con esquizofrenia a los que se proporciona terapia de rehabilitación cognitiva para mejorar el funcionamiento cognitivo.

FÓRMULA: Pacientes con esquizofrenia a los que se proporciona terapia rehabilitación cognitiva para mejorar el funcionamiento cognitivo / Total de pacientes con esquizofrenia en tratamiento × 100.

INDICADOR DE: Proceso.

JUSTIFICACIÓN / EXCLUSIONES / ACLARACIONES: Se recomienda aplicar la terapia de rehabilitación cognitiva, en sus diversas modalidades, como técnica que mejora el funcionamiento cognitivo en una amplia gama de condiciones clínicas del paciente con esquizofrenia.

FUERZA DE LA RECOMENDACIÓN:

A - Al menos un metanálisis, revisión sistemática de ECA, o ECA de nivel 1++, directamente aplicables a la población diana, o evidencia suficiente derivada de estudios de nivel 1+, directamente aplicable a la población diana y que demuestren consistencia global en los resultados.

FUENTE/S DE INFORMACIÓN: Documentación clínica.

BIBLIOGRAFÍA:

- Grupo de Trabajo de la Guía de Práctica Clínica sobre la Esquizofrenia y el Trastorno Psicótico Incipiente. Fòrum de Salut Mental, coordinación. Guía de Práctica Clínica sobre la Esquizofrenia y el Trastorno Psicótico Incipiente. Madrid: Plan de Calidad para el Sistema Nacional de Salud del Ministerio de Sanidad y Consumo. Agència d’Avaluació de Tecnologia i Recerca Mèdiques; 2009. Guía de Práctica Clínica: AATRM. Nº 2006/05-2.
- McGurk SR, Twamley EW, Sitzer DI, McHugo GJ, Mueser KT. A meta-analysis of cognitive remediation in schizophrenia. Am J Psychiatry. 2007;164(12):1791-802.
- Ojeda N, Peña J, Segarra R, et al. La predicción del diagnóstico de esquizofrenia: El rol de la neurocognición en el primer episodio de psicosis. Bilbao: Editorial Universidad de Deusto; 2009.
- Penadés R, Gastó C. El tratamiento de rehabilitación neurocognitiva en la esquizofrenia. Barcelona: Editorial Herder; 2010.
- Penadés R. La rehabilitación neuropsicológica del paciente esquizofrénico [tesis doctoral]. Barcelona: Universitat de Barcelona; 2002.

**CRITERIOS DE CALIDAD EN PSIQUIATRÍA**

**PROCESO/ESQ. INTERVENCIÓN FAMILIAR**

**CRITERIO 16. Terapia de intervención familiar (IF) de tipo psicoeducativo para evitar recaídas y mejorar el pronóstico de la enfermedad**

DEFINICIÓN: Proporción de pacientes con esquizofrenia a los que se proporciona terapia IF de tipo psicoeducativo para evitar recaídas y mejorar el pronóstico de la enfermedad.

FÓRMULA: Pacientes con esquizofrenia a los que se proporciona terapia IF de tipo psicoeducativo para evitar recaídas y mejorar el pronóstico de la enfermedad / Total de pacientes con esquizofrenia × 100.

INDICADOR DE: Proceso.

JUSTIFICACIÓN / EXCLUSIONES / ACLARACIONES: Se recomienda la IF de tipo psicoeducativo, basada en el manejo de la emoción expresada, para evitar recaídas y mejorar el pronóstico la enfermedad (sus efectos se mantienen al cabo de 24 meses).

FUERZA DE LA RECOMENDACIÓN:

A - Al menos un metanálisis, revisión sistemática de ECA, o ECA de nivel 1++, directamente aplicables a la población diana, evidencia suficiente derivada de estudios de nivel 1+, directamente aplicable a la población diana y que demuestren consistencia global en los resultados.

FUENTE/S DE INFORMACIÓN: Documentación clínica.

**INDICADORES DE ESQUIZOFRENIA**

**PROCESO/ESQ. INTERVENCIÓN FAMILIAR**

**CRITERIO 16. Terapia de intervención familiar (IF) de tipo psicoeducativo para evitar recaídas y mejorar el pronóstico de la enfermedad**

BIBLIOGRAFÍA:

- Barbato A, D’Avanzo B. Family interventions in schizophrenia and related disorders: a critical review of clinical trials. Acta Psychiatr Scand. 2000;102(2):81-97.
- Butzlaff RL, Hooley JM. Expressed emotion and psychiatric relapse: meta-analysis. Arch Gen Psychiatry. 1998;55(6):547-52.
- Huxley NA, Rendall M, Sederer L. Psychosocial treatments in schizophrenia: a review of the past 20 years. J Nerv Ment Dis. 2000;188(4):187-201.
- Pastor A, Blanco A, Navarro D. Manual de rehabilitación del trastorno mental grave. Madrid: Editorial Síntesis; 2010.
- Pfammatter M, Junghan UM, Brenner HD. Efficacy of psychological therapy in schizophrenia: conclusions from meta-analyses. Schizophr Bull. 2006;32 Suppl 1:S64-80.
- Pharoah F, Mari J, Rathbone J, Wong W. Family intervention for schizophrenia. Co chrane Database of Systematic Reviews 2006, Issue 4. Art. No.: CD000088. DOI: 10.1002/14651858.CD000088.pub2.
- Pharoah F, Mari J, Rathbone J, Wong W. Intervención familiar para esquizofrenia (Revisión Cochrane traducida). En: La Biblioteca Cochrane Plus, 2007 Número 2. Oxford: Update Software Ltd. Disponible en: [http://www.update-software.com.](http://www.update-software.com/) (Traducida de The Cochrane Library, 2007 Issue Chichester, UK: John Wiley & Sons, Ltd.).
- Pitschel-Walz G, Leucht S, Bäuml J, Kissling W, Engel RR. The effect of family interventions on relapse and rehospitalization in schizophrenia-- A meta-analysis. Schizophr Bull. 2001;27(1):73-92.

**INDICADORES DE TRASTORNO BIPOLAR**

# Indicadores de proceso

**PROCESO/TB. EVALUACIÓN Y DIAGNÓSTICO**

**CRITERIO 1. Evaluación de síntomas del TB en pacientes con otros diagnósticos**

DEFINICIÓN: Proporción de pacientes con DM a los que el médico de Atención Primaria les pregunta por síntomas hipomaníacos o maníacos (presentes y pasados).

FÓRMULA: Pacientes con DM a los que el médico de Atención Primaria les pregunta por síntomas hipomaníacos o maníacos (presentes pasados) / Total de pacientes con DM e hiperactivos o con conducta desinhibida vistos por el médico de Atención Primaria × 100.

INDICADOR DE: Proceso

JUSTIFICACIÓN / EXCLUSIONES / ACLARACIONES: El diagnóstico diferencial del TB se debe realizar tanto con aquellos trastornos en cuyo curso hay presencia de episodios depresivos, como es el caso de la DM recurrente o la ciclotimia, como con aquellos estados con síntomas semejantes a los que aparecen en los episodios maníacos.

FUERZA DE LA RECOMENDACIÓN:

 Práctica recomendada basada en la experiencia clínica y el consenso del equipo redactor.

FUENTE/S DE INFORMACIÓN: Documentación clínica.

BIBLIOGRAFÍA:

- Grupo de Trabajo de la Guía de Práctica Clínica sobre Trastorno Bipolar. Guía de Práctica Clínica sobre Trastorno Bipolar. Madrid: Plan de Calidad para el Sistema Nacional de Salud del Ministerio de Sanidad, Servicios Sociales e Igualdad. Universidad de Alcalá. Asociación Española de Neuropsiquiatría. 2012. UAH / AEN Núm. 2012/1.

**CRITERIOS DE CALIDAD EN PSIQUIATRÍA**

**PROCESO/TB. EVALUACIÓN Y DIAGNÓSTICO**

**CRITERIO 2. Evaluación sistemática de la sintomatología subsindrómica**

DEFINICIÓN: Proporción de pacientes con TB a los que se evalúa sistemáticamente la presencia de sintomatología subsindrómica.

FÓRMULA: Pacientes con TB a los que se evalúa sistemáticamente la presencia de sintomatología subsindrómica / Total de pacientes con TB × 100.

INDICADOR DE: Proceso.

JUSTIFICACIÓN / EXCLUSIONES / ACLARACIONES: Los pacientes con TB presentan a menudo síntomas subsindrómicos que interfieren en su funcionamiento y aumentan el riesgo de presentar un nuevo episodio afectivo. Es necesario evaluar sistemáticamente la presencia de sintomatología subsindrómica, en especial la sintomatología subsindrómica depresiva, por su elevada prevalencia en esta población.

FUERZA DE LA RECOMENDACIÓN:

 Práctica recomendada basada en la experiencia clínica y el consenso del equipo redactor.

FUENTE/S DE INFORMACIÓN: Documentación clínica.

BIBLIOGRAFÍA:

- De Dios C, Ezquiaga E, Agud JL, Vieta E, Soler B, Garcia-Lopez A. Subthreshold symptoms and time to relapse/recurrence in a community cohort of bipolar disorder out- patients. J Affect Disord . 2012;143:160-5.
- Grupo de Trabajo de la Guía de Práctica Clínica sobre Trastorno Bipolar. Guía de Práctica Clínica sobre Trastorno Bipolar. Madrid: Plan de Calidad para el Sistema Nacional de Salud del Ministerio de Sanidad, Servicios Sociales e Igualdad. Universidad de Alcalá. Asociación Española de Neuropsiquiatría. 2012. UAH / AEN Núm. 2012/1.
- Judd LL, Schettler PJ, Akiskal HS, et al. Residual symptom recovery from major affective episodes in bipolar disorders and rapid episode relapse/recurrence. Arch Gen Psychiatry. 2008; 65:386-94.

**INDICADORES DE TRASTORNO BIPOLAR**

**PROCESO/TB. EVALUACIÓN Y DIAGNÓSTICO**

**CRITERIO 3. Atención a la comorbilidad en pacientes con TB, incluyendo uso de tóxicos**

DEFINICIÓN: Proporción pacientes con TB en los que se presta atención a la potencial comorbilidad con otros trastornos (especialmente trastornos de ansiedad y abuso/dependencia de sustancias).

FÓRMULA: Pacientes con TB en los que se presta atención a la potencial comorbilidad con otros trastornos en el diagnóstico y tratamiento / Total del pacientes con TB × 100.

INDICADOR DE: Proceso.

JUSTIFICACIÓN / EXCLUSIONES / ACLARACIONES: La comorbilidad psiquiátrica del TB es muy alta, hasta el punto de ser raro el TB "puro". Por ello, cuando se diagnostica y se trata a un paciente con TB debe prestarse atención a la potencial comorbilidad con otros trastornos, especialmente trastornos de ansiedad abuso/dependencia de sustancias, presentes hasta en la mitad de casos.

FUERZA DE LA RECOMENDACIÓN:

 Práctica recomendada basada en la experiencia clínica y el consenso del equipo redactor.

FUENTE/S DE INFORMACIÓN: Documentación clínica.

**CRITERIOS DE CALIDAD EN PSIQUIATRÍA**

**PROCESO/TB. EVALUACIÓN Y DIAGNÓSTICO**

**CRITERIO 3. Atención a la comorbilidad en pacientes con TB, incluyendo uso de tóxicos**

BIBLIOGRAFÍA:

- Agrawal A, Nurnberger JI Jr, Lynskey MT. Cannabis involvement in individuals with bipolar disorder. Psychiatry Res. 2011;185(3):459-461.
- Bauer MS, Altshuler L, Evans DR, Beresford T, Williford WO, Hauger R. Prevalence and distinct correlates of anxiety, substance, and combined comorbidity in a multi-site public sector sample with bipolar disorder. Affect Disord. 2005;85(3):301-15.
- Cassidy F, Ahearn EP, Carroll BJ. Substance abuse in bipolar disorder. Bipolar Disord. 2001;3(4):181-8.
- Chengappa KN, Levine J, Gershon S, Kupfer DJ. Lifetime prevalence of substance or alcohol abuse and dependence among subjects with bipolar I and II disorders in a voluntary registry. Bipolar Disord. 2000;2(3 Pt 1):191-5.
- Fogarty F, Russell JM, Newman SC, Bland RC. Epidemiology of psychiatric disorders in Edmonton. Mania. Acta Psychiatr Scand Suppl. 1994;376:16-23.
- Garcia-Portilla MP, Saiz PA, Benabarre A, et al. Impact of substance use on the physical health of patients with bipolar disorder. Acta Psychiatr Scand. 2008;121(6):437-45.
- Grupo de Trabajo de la Guía de Práctica Clínica sobre Trastorno Bipolar. Guía de Práctica Clínica sobre Trastorno Bipolar. Madrid: Plan de Calidad para el Sistema Nacional de Salud del Ministerio de Sanidad, Servicios Sociales e Igualdad. Universidad de Alcalá. Asociación Española de Neuropsiquiatría. 2012. UAH / AEN Núm. 2012/1.
- Kessler RC, Zhao S, Blazer DG, Swartz M. Prevalence, correlates, and course of minor depression and major depression in the National Comorbidity Survey. J Affect Disord. 1997;45(1-2):19-30.
- McElroy SL, Altshuler LL, Suppes T, et al. Axis I psychiatric comorbidity and its relationship to historical illness variables 288 patients with bipolar disorder. Am J Psychiatry. 2001;158(3):420-6.
- Mueser KT, Yarnold PR, Bellack AS. Diagnostic and demographic correlates of substance abuse in schizophrenia and major affective disorder. Acta Psychiatr Scand. 1992;85(1):48-55.
- Rabinowitz J, Bromet EJ, Lavelle J, Carlson G, Kovasznay B, Schwartz JE. Prevalence and severity of substance use disorders and onset of psychosis in first-admission psychotic patients. Psychol Med. 1998;28(6):1411-9.
- Regier DA, Farmer ME, Rae DS, et al. Comorbidity of mental disorders with alcohol and other drug abuse. Results from the Epidemiologic Catchment (ECA) Study. JAMA. 1990;264(19):2511-8.
- Strakowski SM, DelBello MP, Fleck DE, et al. Effects of co-occurring cannabis use disorders on the course of bipolar disorder after a first hospitalization for mania. Arch Gen Psychiatry. 2007;64(1):57-64.

**INDICADORES DE TRASTORNO BIPOLAR**

**PROCESO/TB. EVALUACIÓN Y DIAGNÓSTICO**

**CRITERIO 4. Evaluación y monitorización de la salud física**

DEFINICIÓN: Proporción de pacientes con TB en los que se evalúa y monitoriza la función sexual, el deseo reproductivo, las constantes cardiacas, los parámetros antropométricos y serológicos, el uso de sustancias y la función hepática, y se les recomienda la adopción de hábitos de vida saludables y la realización de un programa de deshabituación tabáquica durante los procesos de evaluación, tratamiento y seguimiento.

FÓRMULA: Pacientes con TB en los que se evalúa y monitoriza la función sexual, el deseo reproductivo, las constantes cardiacas, los parámetros antropométricos y serológicos, el uso de sustancias y la función hepática, y se les recomienda la adopción de hábitos de vida saludables y la realización de un programa de deshabituación tabáquica durante los procesos de evaluación, tratamiento y seguimiento / Total de pacientes con TB × 100.

INDICADOR DE: Proceso.

JUSTIFICACIÓN / EXCLUSIONES / ACLARACIONES: Los pacientes con TB presentan una mayor prevalencia de enfermedades físicas que la población general.

Se ha detectado un riesgo aumentado, entre los pacientes con TB, de presentar hipertensión arterial. Por ello, se recomienda determinar la tensión arterial sistólica (TAS) y diastólica (TAD) de forma basal. En caso de que los resultados de la primera medición sean normales, se recomienda al menos una nueva determinación a los 3 meses y posteriormente cada 6 meses.

Se ha observado, entre estos pacientes, un riesgo aumentado de presentar obesidad. Por ello, se debe determinar el peso, la talla, el índice de masa corporal (IMC) y la medición del perímetro abdominal, y realizar determinaciones analíticas de glucosa y lípidos. Si estas medidas se encuentran en el rango de la normalidad, se repetirán anualmente. Es funda- mental la reducción de peso en caso de sobrepeso/obesidad.

A todo paciente con TB se le debe preguntar sobre la presencia de disfunción sexual y deseo reproductivo, y, en su caso, orientar o recomendar acerca del método adecuado de contracepción. Se recomendará la utilización de preservativo u otros métodos protectores si existen conductas sexuales de riesgo. Se deben realizar de forma basal las siguientes determinaciones serológicas: anticuerpos anti-VIH (ELISA), anticuerpos anti-VHB (ELISA), anticuerpos anti-VHC (ELISA) VDRL/RPR.

FUERZA DE LA RECOMENDACIÓN:

 Práctica recomendada basada en la experiencia clínica y el consenso del equipo redactor.

FUENTE/S DE INFORMACIÓN: Documentación clínica.

**CRITERIOS DE CALIDAD EN PSIQUIATRÍA**

**PROCESO/TB. EVALUACIÓN Y DIAGNÓSTICO**

**CRITERIO 4. Evaluación y monitorización de la salud física**

BIBLIOGRAFÍA:

- Bobes J, Saiz Ruiz J, Montes J, Mostaza J, Rico-Villademoros F, Vieta E. Consenso Español de Salud Física del Paciente con Trastorno Bipolar. Rev Psiquiatr Salud Ment. 2008;1(1):26-37.
- Grupo de Trabajo de la Guía de Práctica Clínica sobre Trastorno Bipolar. Guía de Práctica Clínica sobre Trastorno Bipolar. Madrid: Plan de Calidad para el Sistema Nacional de Salud del Ministerio de Sanidad, Servicios Sociales Igualdad. Universidad de Alcalá. Asociación Española de Neuropsiquiatría. 2012. UAH / AEN Núm. 2012/1.

**INDICADORES DE TRASTORNO BIPOLAR**

**PROCESO/TB. MANEJO CLÍNICO**

**CRITERIO 5. Documentación del tratamiento**

DEFINICIÓN: Proporción de pacientes con TB en cuya historia clínica se recogen los aspectos fundamentales del plan de tratamiento.

FÓRMULA: Pacientes con TB en cuya historia clínica se recogen los aspectos fundamentales del plan de tratamiento / Total de pacientes con TB tratados × 100.

INDICADOR DE: Proceso.

JUSTIFICACIÓN / EXCLUSIONES / ACLARACIONES: La historia clínica debe incluir los aspectos fundamentales del tratamiento: evaluación y diagnóstico, objetivos generales y específicos, tratamientos aplicados, evolución del paciente y planes de cuidado y rehabilitación.

FUERZA DE LA RECOMENDACIÓN:

 Práctica recomendada basada en la experiencia clínica y el consenso del equipo redactor.

FUENTE/S DE INFORMACIÓN: Documentación clínica.

BIBLIOGRAFÍA:

- Grupo de Trabajo de la Guía de Práctica Clínica sobre Trastorno Bipolar. Guía de Práctica Clínica sobre Trastorno Bipolar. Madrid: Plan de Calidad para el Sistema Nacional de Salud del Ministerio de Sanidad, Servicios Sociales e Igualdad. Universidad de Alcalá. Asociación Española de Neuropsiquiatría. 2012. UAH / AEN Núm. 2012/1.

**CRITERIOS DE CALIDAD EN PSIQUIATRÍA**

**PROCESO/TB. INTERVENCIONES FARMACOLÓGICAS**

**CRITERIO 6. Abordaje de la anticoncepción en la mujer**

DEFINICIÓN: Proporción de mujeres con TB en edad fértil en las que se abordan las medidas anticonceptivas y el riesgo de embarazo antes de iniciar tratamiento farmacológico.

FÓRMULA: Mujeres con TB en edad fértil en las que se abordan las medidas anticonceptivas y el riesgo de embarazo antes de iniciar tratamiento farmacológico / Total de mujeres con TB en edad fértil susceptibles de recibir tratamiento farmacológico × 100.

INDICADOR DE: Proceso.

JUSTIFICACIÓN / EXCLUSIONES / ACLARACIONES: Antes de iniciar tratamiento farmacológico, se deben abordar las medidas anticonceptivas y el riesgo de embarazo con todas las mujeres en edad fértil, independientemente de que tengan planeado o no quedarse embarazadas.

FUERZA DE LA RECOMENDACIÓN:

 Práctica recomendada basada en la experiencia clínica y el consenso del equipo redactor.

FUENTE/S DE INFORMACIÓN: Documentación clínica.

BIBLIOGRAFÍA:

- Grupo de Trabajo de la Guía de Práctica Clínica sobre Trastorno Bipolar. Guía de Práctica Clínica sobre Trastorno Bipolar. Madrid: Plan de Calidad para el Sistema Nacional de Salud del Ministerio de Sanidad, Servicios Sociales e Igualdad. Universidad de Alcalá. Asociación Española de Neuropsiquiatría. 2012. UAH / AEN Núm. 2012/1.
- National Institute for Health and Clinical Excellence. Bipolar disorder. The management of bipolar disorder in adults, children and adolescents, in primary and secondary care. The British Psychological Society and Gaskell; 2006.

**INDICADORES DE TRASTORNO BIPOLAR**

**PROCESO/TB. INTERVENCIONES FARMACOLÓGICAS**

**CRITERIO 7. Suspensión del tratamiento con antidepresivos en fase maníaca**

DEFINICIÓN: Proporción pacientes con TB a los que se suspende el tratamiento con antidepresivos al inicio de un episodio maníaco.

FÓRMULA: Proporción de pacientes con TB a los que se suspende el tratamiento con antidepresivos al inicio de un episodio maníaco / Total de pacientes con TB en tratamiento con antidepresivos que inician un episodio maníaco × 100.

INDICADOR DE: Proceso.

JUSTIFICACIÓN / EXCLUSIONES / ACLARACIONES: Si un paciente está tomando un antidepresivo al inicio de un episodio maníaco, este debe ser suspendido. Puede suspenderse de forma abrupta o gradual, dependiendo de las necesidades clínicas actuales del paciente y de la experiencia previa de supresión.

FUERZA DE LA RECOMENDACIÓN:

 Práctica recomendada basada en la experiencia clínica y el consenso del equipo redactor.

FUENTE/S DE INFORMACIÓN: Documentación clínica.

BIBLIOGRAFÍA:

- Grupo de Trabajo de la Guía de Práctica Clínica sobre Trastorno Bipolar. Guía de Práctica Clínica sobre Trastorno Bipolar. Madrid: Plan de Calidad para el Sistema Nacional de Salud del Ministerio de Sanidad, Servicios Sociales e Igualdad. Universidad de Alcalá. Asociación Española de Neuropsiquiatría. 2012. UAH / AEN Núm. 2012/1.
- National Institute for Health and Clinical Excellence. Bipolar disorder. The management of bipolar disorder in adults, children and adolescents, in primary and secondary care. The British Psychological Society and Gaskell; 2006.
- Pacchiarotti I, Bond DJ, Baldessarini RJ, et al. The International Society for Bipolar Disorders (ISBD) task force report on antidepressant use in bipolar disorders. Am J Psychiatry. 2013;170(11):1249-62.

**CRITERIOS DE CALIDAD EN PSIQUIATRÍA**

**PROCESO/TB. TRATAMIENTO FARMACOLÓGICO DE LA MANÍA AGUDA EN PERSONAS QUE YA ESTÁN TOMANDO MEDICACIÓN ANTIMANÍACA**

**CRITERIO 8. Adición de antipsicótico en el tratamiento de un episodio maníaco**

DEFINICIÓN: Proporción de pacientes que presentan un episodio maníaco cuando ya están tomando litio o valproato y en quienes se considera la adición de un antipsicótico.

FÓRMULA: Pacientes que presentan un episodio maníaco cuando ya están tomando litio o valproato y en quienes se considera la adición de un antipsicótico / Total de pacientes que presentan un episodio maníaco cuando ya están tomando litio o valproato × 100.

INDICADOR DE: Proceso.

JUSTIFICACIÓN / EXCLUSIONES / ACLARACIONES: Para aquellos pacientes que presenten un episodio maníaco cuando ya están tomando litio o valproato, se considerará la adición de un antipsicótico al mismo tiempo que se van optimizando gradualmente las dosis de valproato o litio.

FUERZA DE LA RECOMENDACIÓN:

 Práctica recomendada basada en la experiencia clínica y el consenso del equipo redactor.

FUENTE/S DE INFORMACIÓN: Documentación clínica.

BIBLIOGRAFÍA:

- Grande I, Vieta E. Pharmacotherapy acute mania: monotherapy or combination therapy with mood stabilizers and antipsychotics? CNS Drugs. 2015;29(3):221-7.
- Grupo de Trabajo de la Guía de Práctica Clínica sobre Trastorno Bipolar. Guía de Práctica Clínica sobre Trastorno Bipolar. Madrid: Plan de Calidad para el Sistema Nacional de Salud del Ministerio de Sanidad, Servicios Sociales e Igualdad. Universidad de Alcalá. Asociación Española de Neuropsiquiatría. 2012. UAH / AEN Núm. 2012/1.

**INDICADORES DE TRASTORNO BIPOLAR**

**PROCESO/TB. TRATAMIENTO DEL EPISODIO DEPRESIVO AGUDO EN EL TRASTORNO BIPOLAR**

**CRITERIO 9. Utilización de quetiapina en pacientes con DM bipolar aguda**

DEFINICIÓN: Proporción pacientes con DM bipolar aguda de tipo I o II a los que se prescribe quetiapina.

FÓRMULA: Pacientes con DM bipolar aguda de tipo I o II a los que se prescribe quetiapina / Total de pacientes con DM bipolar aguda de tipo I o II × 100.

INDICADOR DE: Proceso.

JUSTIFICACIÓN / EXCLUSIONES / ACLARACIONES: La quetiapina es el primer antipsicótico atípico aprobado para ser administrado como monoterapia en pacientes con DM bipolar. El fármaco fue aprobado con anterioridad para tratar los episodios maníacos asociados con el TB de tipo I.

FUERZA DE LA RECOMENDACIÓN:

A - Al menos un metanálisis, revisión sistemática de ECA, o ECA de nivel 1++, directamente aplicables a la población diana, evidencia suficiente derivada de estudios de nivel 1+, directamente aplicable a la población diana y que demuestren consistencia global en los resultados.

FUENTE/S DE INFORMACIÓN: Documentación clínica.

BIBLIOGRAFÍA:

- Grupo de Trabajo de la Guía de Práctica Clínica sobre Trastorno Bipolar. Guía de Práctica Clínica sobre Trastorno Bipolar. Madrid: Plan de Calidad para el Sistema Nacional de Salud del Ministerio de Sanidad, Servicios Sociales e Igualdad. Universidad de Alcalá. Asociación Española de Neuropsiquiatría. 2012. UAH / AEN Núm. 2012/1.

**CRITERIOS DE CALIDAD EN PSIQUIATRÍA**

**PROCESO/TB. TRATAMIENTO A LARGO PLAZO DEL TRASTORNO BIPOLAR: INICIO**

**CRITERIO 10. Evaluación previa a la elección del tratamiento farmacológico a largo plazo**

DEFINICIÓN: Proporción de pacientes en los que se evalúa la respuesta a tratamientos previos, la polaridad predominante, los factores de riesgo de salud física, el tipo de cumplimiento y se considera el sexo del paciente como precaución antes de elegir un tratamiento a largo plazo para el TB.

FÓRMULA: Pacientes en los que se evalúa la respuesta a tratamientos previos, la polaridad predominante, los factores de riesgo de salud física, el tipo de cumplimiento y se considera el sexo del paciente como precaución antes de elegir un tratamiento a largo plazo para el TB / Total de pacientes con a quienes se va a prescribir un tratamiento a largo plazo para el TB × 100.

INDICADOR DE: Proceso.

JUSTIFICACIÓN / EXCLUSIONES / ACLARACIONES: En la elección de tratamiento farmacológico a largo plazo del TB se tomará en consideración:

- La respuesta a tratamientos previos.
- El riesgo de episodios maníacos o depresivos (polaridad predominante).
- Factores de riesgo de salud física, en especial enfermedad renal, obesidad y diabetes.
- Las preferencias del paciente y el tipo de cumplimiento y adherencia previo.
- Sexo (el valproato se debería evitar en mujeres con probabilidad de gestación).

FUERZA DE LA RECOMENDACIÓN:

 Práctica recomendada basada en la experiencia clínica y el consenso del equipo redactor

FUENTE/S DE INFORMACIÓN: Documentación clínica.

BIBLIOGRAFÍA:

- Grupo de Trabajo de la Guía de Práctica Clínica sobre Trastorno Bipolar Guía de Práctica Clínica sobre Trastorno Bipolar. Madrid: Plan de Calidad para el Sistema Nacional de Salud del Ministerio de Sanidad, Servicios Sociales e Igualdad. Universidad de Alcalá. Asociación Española de Neuropsiquiatría. 2012. UAH / AEN Núm. 2012/1.
- National Institute for Health and Clinical Excellence. Bipolar disorder. The management of bipolar disorder in adults, children and adolescents, in primary and secondary care. The British Psychological Society and Gaskell; 2006.

**INDICADORES DE TRASTORNO BIPOLAR**

**PROCESO/TB. TRATAMIENTO A LARGO PLAZO DEL TRASTORNO BIPOLAR: INICIO DEL LITIO**

**CRITERIO 11. Utilización de litio con o sin valproato para la prevención de episodios afectivos en pacientes con TB I**

DEFINICIÓN: Proporción de pacientes con TB I a los que se prescribe litio o la combinación de litio con valproato para la prevención de episodios afectivos.

FÓRMULA: Pacientes con TB I a los que se prescribe litio o la combinación de litio con valproato para prevención de episodios afectivos / Total de pacientes con TB I en trata- miento para la prevención de episodios afectivos × 100.

INDICADOR DE: Proceso.

JUSTIFICACIÓN / EXCLUSIONES / ACLARACIONES: La combinación de litio con valproato no es superior al litio en monoterapia. Este tratamiento combinado es superior a valproato en monoterapia en cuanto a la prevención de un nuevo episodio afectivo y de nuevo episodio maníaco, pero no de un nuevo episodio depresivo (1+).

FUERZA DE LA RECOMENDACIÓN:

A - Al menos un metanálisis, revisión sistemática de ECA, o ECA de nivel 1++, directamente aplicables a la población diana, o evidencia suficiente derivada de estudios de nivel 1+, directamente aplicable a la población diana y que demuestren consistencia global en los resultados.

FUENTE/S DE INFORMACIÓN: Documentación clínica.

BIBLIOGRAFÍA:

- Geddes JR, Goodwin GM, Rendell J, et Lithium plus valproate combination therapy versus monotherapy for relapse prevention in bipolar I disorder (BALANCE): a randomised open-label trial. Lancet. 2010;375(9712):385-95.
- Grupo de Trabajo de la Guía de Práctica Clínica sobre Trastorno Bipolar. Guía de Práctica Clínica sobre Trastorno Bipolar. Madrid: Plan de Calidad para el Sistema Nacional de Salud del Ministerio de Sanidad, Servicios Sociales e Igualdad. Universidad de Alcalá. Asociación Española de Neuropsiquiatría. 2012. UAH / AEN Núm. 2012/1.

**CRITERIOS DE CALIDAD EN PSIQUIATRÍA**

**PROCESO/TB. TRATAMIENTO A LARGO PLAZO DEL TRASTORNO BIPOLAR: PRECAUCIONES DE USO DE VALPROATO**

**CRITERIO 12. Evitar el uso de valproato en mujeres en edad fértil**

DEFINICIÓN: Proporción de mujeres en edad fértil con TB a las que se les prescribe valproato.

FÓRMULA: Mujeres en edad fértil con TB a las que se les prescribe valproato / Total de mujeres con TB en edad fértil en tratamiento × 100.

INDICADOR DE: Proceso.

JUSTIFICACIÓN / EXCLUSIONES / ACLARACIONES: No se debería prescribir valproato de rutina a las mujeres en edad fértil.

FUERZA DE LA RECOMENDACIÓN:

 Práctica recomendada basada en la experiencia clínica y el consenso del equipo redactor.

FUENTE/S DE INFORMACIÓN: Documentación clínica.

BIBLIOGRAFÍA:

- Grupo de Trabajo de la Guía de Práctica Clínica sobre Trastorno Bipolar. Guía de Práctica Clínica sobre Trastorno Bipolar. Madrid: Plan de Calidad para el Sistema Nacional de Salud del Ministerio de Sanidad, Servicios Sociales e Igualdad. Universidad de Alcalá. Asociación Española de Neuropsiquiatría. 2012. UAH / AEN Núm. 2012/1.

**INDICADORES DE TRASTORNO BIPOLAR**

**PROCESO/TB. TRATAMIENTO A LARGO PLAZO DEL TRASTORNO BIPOLAR: ANTIDEPRESIVOS**

**CRITERIO 13. Evitar la continuación del tratamiento con antidepresivos en cicladores rápidos**

DEFINICIÓN: Proporción de pacientes cicladores rápidos en los que se continúa el tratamiento con antidepresivos a largo plazo.

FÓRMULA: Pacientes cicladores rápidos en los que se continúa el tratamiento con antidepresivos a largo plazo / Total de pacientes cicladores rápidos tratados con antidepresivos en fase aguda × 100.

INDICADOR DE: Proceso.

JUSTIFICACIÓN / EXCLUSIONES / ACLARACIONES: El mantenimiento a largo plazo de los antidepresivos asociados a estabilizadores produce un agravamiento en los pacientes cicladores rápidos (1+).

FUERZA DE LA RECOMENDACIÓN:

A - Al menos un metanálisis, revisión sistemática de ECA, o ECA de nivel 1++, directamente aplicables a la población diana, evidencia suficiente derivada de estudios de nivel 1+, directamente aplicable a la población diana y que demuestren consistencia global en los resultados.

FUENTE/S DE INFORMACIÓN: Documentación clínica.

BIBLIOGRAFÍA:

- Ghaemi SN, Ostacher MM, El-Mallakh RS, et al. Antidepressant discontinuation in bipolar depression: a Systematic Treatment Enhancement Program for Bipolar Disorder (STEP-BD) randomized clinical trial of long-term effectiveness and safety. J Clin Psychiatry. 2010;71(4):372-80.
- Grupo de Trabajo de la Guía de Práctica Clínica sobre Trastorno Bipolar. Guía de Práctica Clínica sobre Trastorno Bipolar. Madrid: Plan de Calidad para el Sistema Nacional de Salud del Ministerio de Sanidad, Servicios Sociales e Igualdad. Universidad de Alcalá. Asociación Española de Neuropsiquiatría. 2012. UAH / AEN Núm. 2012/1.
- Pacchiarotti I, Bond DJ, Baldessarini RJ, et al. The International Society for Bipolar Disorders (ISBD) task force report on antidepressant use in bipolar disorders. Am J Psychiatry. 2013;170(11):1249-62.

**CRITERIOS DE CALIDAD EN PSIQUIATRÍA**

_________________________________________________________________________

**PROCESO/TB. TERAPIA ELECTROCONVULSIVA**

**CRITERIO 14. Terapia electroconvulsiva (TEC) en pacientes con TB y trastorno depresivo grave resistentes a otras opciones terapéuticas**

DEFINICIÓN: Proporción de pacientes con TB y trastorno depresivo grave que no responden a otras opciones terapéuticas y/o se encuentran en una situación de amenaza para vida a los que se administra TEC.

FÓRMULA: Pacientes con TB y trastorno depresivo grave que no responden a otras opciones terapéuticas y/o se encuentran en una situación de amenaza para la vida a los que se administra TEC / Total de pacientes con TB que cumplen los criterios descritos × 100.

INDICADOR DE: Proceso.

JUSTIFICACIÓN / EXCLUSIONES / ACLARACIONES: La TEC se muestra eficaz en el tratamiento en monoterapia o en combinación con tratamiento farmacológico en la DM bipolar grave (1−).

FUERZA DE LA RECOMENDACIÓN:

 Práctica recomendada basada en la experiencia clínica y el consenso del equipo redactor.

FUENTE/S DE INFORMACIÓN: Documentación clínica.

BIBLIOGRAFÍA:

- Grupo de Trabajo de la Guía de Práctica Clínica sobre Trastorno Bipolar. Guía de Práctica Clínica sobre Trastorno Bipolar. Madrid: Plan de Calidad para Sistema Nacional de Salud del Ministerio de Sanidad, Servicios Sociales e Igualdad. Universidad de Alcalá. Asociación Española de Neuropsiquiatría. 2012. UAH / AEN Núm. 2012/1.
- Kellner CH, Knapp R, Husain MM, et al. Bifrontal, bitemporal and right unilateral electrode placement in ECT: randomised trial. J Psychiatry. 2010;196:226-34.
- Loo C, Katalinic N, Mitchell PB, Greenberg B. Physical treatments for bipolar disorder: A review of electroconvulsive therapy, stereotactic surgery and other brain stimulation techniques. J Affect Disord. 2011;132(1-2):1-13.
- National Institute for Health and Clinical Excellence. Bipolar disorder. The management of bipolar disorder in adults, children and adolescents, in primary and secondary care. The British Psychological Society and Gaskell; 2006.
- Schoeyen HK, Kessler U, Andreassen OA, et al. Treatment-resistant bipolar depression: a randomized controlled trial of electroconvulsive therapy versus algorithm-based pharmacological treatment. Am J Psychiatry. 2015;172(1):41-51.
- Versiani M, Cheniaux E, Landeira-Fernandez J. Efficacy and safety of electroconvulsive therapy in the treatment of bipolar disorder: A systematic review. J ECT. 2011;27(2):153-64.

**INDICADORES DE TRASTORNO BIPOLAR**

**PROCESO/TB. INTERVENCIONES PSICOSOCIALES**

**CRITERIO 15. Psicoeducación en pacientes estabilizados**

DEFINICIÓN: Proporción de pacientes con TB en tratamiento farmacológico y estables sintomáticamente con los que se lleva a cabo psicoeducación.

FÓRMULA: Pacientes con TB en tratamiento farmacológico y estables sintomáticamente con los que se lleva cabo psicoeducación / Total de pacientes con TB con los que se lleva a cabo psicoeducación × 100.

INDICADOR DE: Proceso.

JUSTIFICACIÓN / EXCLUSIONES / ACLARACIONES: En pacientes con TB complementar el tratamiento farmacológico con determinadas intervenciones psicológicas estructuradas (psicoeducación, terapia cognitivo-conductual, terapia interpersonal y de ritmos sociales, intervención familiar) puede mejorar el curso de la enfermedad, reduciendo el riesgo de recaídas (1++). En pacientes con TB en tratamiento farmacológico la psicoeducación individual centrada en el entrenamiento para la identificación precoz y actuación ante los pródromos es eficaz para la prevención de episodios maníacos (1+).

FUERZA DE LA RECOMENDACIÓN:

A Al menos un metanálisis, revisión sistemática de ECA, o ECA de nivel 1++, directamente aplicables a la población diana, o evidencia suficiente derivada de estudios de nivel 1+, directamente aplicable a la población diana y que demuestren consistencia global en los resultados.

FUENTE/S DE INFORMACIÓN: Documentación clínica.

BIBLIOGRAFÍA:

- Grupo de Trabajo la Guía de Práctica Clínica sobre Trastorno Bipolar. Guía de Práctica Clínica sobre Trastorno Bipolar. Madrid: Plan de Calidad para el Sistema Nacional de Salud del Ministerio de Sanidad, Servicios Sociales e Igualdad. Universidad de Alcalá. Asociación Española de Neuropsiquiatría. 2012. UAH / AEN Núm. 2012/1.
- Lam DH, Burbeck R, Wright K, Pilling S. Psychological therapies in bipolar disorder: the effect of illness history on elapse prevention - a systematic review. Bipolar Disord.

2009;11(5):474-82.

- Miklowitz DJ, Scott J. Psychosocial treatments for bipolar disorder: cost-effectiveness, mediating mechanisms, and future directions. Bipolar Disord. 2009;11 Suppl 2:110-22.
- Perry A, Tarrier N, Morriss R, McCarthy E, Limb K. Randomised controlled trial of efficacy teaching patients with bipolar disorder to identify early symptoms of relapse and obtain treatment. BMJ. 1999;318:149-53.
- Scott J, Colom F, Vieta E. A meta-analysis of relapse rates with adjunctive psychological therapies compared to usual psychiatric treatment for bipolar disorders. Int J Neuropsychopharmacol. 2007;10(1):123-9.

**CRITERIOS DE CALIDAD EN PSIQUIATRÍA**

**PROCESO/TB. CUIDADOS DE ENFERMERÍA**

**CRITERIO 16. Seguimiento con contactos regulares mediante consultas presenciales y telefónicas**

DEFINICIÓN: Proporción de pacientes con TB a los que, desde enfermería, se realiza seguimiento con contactos regulares mediante consultas presenciales y telefónicas.

FÓRMULA: Pacientes con TB a los que, desde enfermería, se realiza seguimiento con contactos regulares mediante consultas presenciales y telefónicas / Total de pacientes con TB × 100.

INDICADOR DE: Proceso.

JUSTIFICACIÓN / EXCLUSIONES / ACLARACIONES: El seguimiento debe realizarse con contactos regulares en la consulta de enfermería y además es aconsejable apoyar el seguimiento a través de la consulta telefónica.

FUERZA DE LA RECOMENDACIÓN:

C - Evidencia suficiente derivada de estudios de nivel 2+, directamente aplicable a la población diana y que demuestren consistencia global en los resultados. Evidencia extrapolada de estudios de nivel 2++.

FUENTE/S DE INFORMACIÓN: Documentación clínica.

BIBLIOGRAFÍA:

- Grupo de Trabajo de la Guía de Práctica Clínica sobre Trastorno Bipolar. Guía de Práctica Clínica sobre Trastorno Bipolar. Madrid: Plan de Calidad para el Sistema Nacional de Salud del Ministerio de Sanidad, Servicios Sociales e Igualdad. Universidad de Alcalá. Asociación Española de Neuropsiquiatría. 2012. UAH / AEN Núm. 2012/1.

**INDICADORES DE TRASTORNO BIPOLAR**

# Indicadores de resultado

**RESULTADO/TB. INTOXICACIÓN POR LITIO**

**CRITERIO 1. Intoxicación por litio en pacientes con TB**

DEFINICIÓN: Proporción de pacientes con TB que presentan intoxicación por litio.

FÓRMULA: Pacientes con TB que presentan intoxicación por litio / Total de pacientes con TB × 100.

INDICADOR DE: Resultado.

JUSTIFICACIÓN / EXCLUSIONES / ACLARACIONES: Es probable que los agentes de mantenimiento se precisen de forma continuada deberían seleccionarse según sus perfiles de eficacia y seguridad conjuntamente con los factores individuales del paciente, incluyendo la preferencia, la respuesta anterior y los factores de seguridad. En este as- pecto, el litio debe ser monitorizado regularmente para mantener los niveles plasmáticos terapéuticos (0,4-1,0 mmol/l).

Como efectos adversos del tratamiento con litio se pueden destacar:

Toxicidad por litio: signos que incluyen pérdida de equilibrio, aumento de diarrea, vómitos, anorexia, debilidad, ataxia, visión borrosa, tinnitus, poliuria, temblor grosero, temblores musculares, irritabilidad y agitación.

Somnolencia, psicosis, desorientación, convulsiones, y se puede dar coma y fracaso renal.

FUERZA DE LA RECOMENDACIÓN:

D - Evidencia de nivel 3 o 4. Evidencia extrapolada de estudios de nivel 2+.

FUENTE/S DE INFORMACIÓN: Documentación clínica.

BIBLIOGRAFÍA:

- Malhi GS, Adams D, Lampe L, et al. Recomendaciones para la práctica clínica en el trastorno bipolar. RET, Revista de Toxicomanías. 2009;57.
