# Supplementary material
Source: Elsevier journal article supplement (https://www.sciencedirect.com/science/article/pii/S2173505018300189)
Supplement: mmc2 [file S2173505018300189:mmc2.doc]

**INDICADORES COMUNES: DEPRESIÓN MAYOR, ESQUIZOFRENIA Y TRASTORNO BIPOLAR**

Indicadores de resultado

**RESULTADO/DM-ESQ-TB. UNIDAD DE AGUDOS**

**CRITERIO 1. Pertinencia de ingresos en la Unidad de Agudos**

DEFINICIÓN: Pacientes con DM-ESQ-TB atendidos en la Unidad de Agudos que cumplían con criterios de ingreso.

FÓRMULA: Pacientes con DM-ESQ-TB atendidos en la Unidad de Agudos que cumplían los criterios de ingreso / Total de pacientes con trastorno mental grave atendidos en la Unidad de Agudos × 100.

INDICADOR DE: Resultado.

JUSTIFICACIÓN / EXCLUSIONES / ACLARACIONES: Las unidades de agudos o los servicios de hospitalización psiquiátrica de agudos están destinados a prestar atención integral pacientes en situaciones de descompensación o agudas presentan riesgo psicopatológico grave y que requieren una intervención inmediata (en un plazo inferior a 24 horas) y breve con actuaciones clínicas intensivas. El objetivo de estas intervenciones es conseguir la estabilización clínica del paciente y que este vuelva a su entorno familiar, laboral y social en unas condiciones de remisión clínica que permitan su seguimiento ambulatorio desde un servicio de atención comunitaria. En los casos en los que se logra la estabilización clínica pero no la mejora funcional necesaria, se debe gestionar la derivación del paciente al dispositivo asistencial oportuno.

FUERZA DE LA RECOMENDACIÓN:

 Práctica recomendada basada en la experiencia clínica y el consenso del equipo redactor.

FUENTE/S DE INFORMACIÓN: Documentación clínica.

BIBLIOGRAFÍA:

- Grupo de Trabajo de la Guía de Práctica Clínica sobre la Esquizofrenia y el Trastorno Psicótico Incipiente. Fòrum de Salut Mental, coordinación. Guía de Práctica Clínica sobre la Esquizofrenia y el Trastorno Psicótico Incipiente. Madrid: Plan de Calidad para el Sistema Nacional de Salud del Ministerio de Sanidad y Consumo. Agència d’Avaluació de Tecnologia i Recerca Mèdiques; 2009. Guía de Práctica Clínica: AATRM. Nº 2006/05-2.
- Sistema de Información de Atención Primaria del SNS (SIAP). Atención a la salud mental. Madrid: Plan de Calidad para el Sistema Nacional de Salud del Ministerio de Sanidad y Consumo; 2009.

**CRITERIOS DE CALIDAD EN PSIQUIATRÍA**

**RESULTADO/DM-ESQ-TB. RECURRENCIA**

**CRITERIO 2. Recurrencias en pacientes con DM-ESQ-TB**

DEFINICIÓN: Proporción de pacientes con DM-ESQ-TB en remisión que presentan recurrencias.

FÓRMULA: Pacientes con DM-ESQ-TB en remisión que presentan una recurrencias / Total de pacientes con DM-ESQ-TB en remisión × 100.

INDICADOR DE: Resultado.

JUSTIFICACIÓN / EXCLUSIONES / ACLARACIONES: El término recurrencia hace referencia a la aparición de un nuevo episodio del trastorno mental en cuestión tras la recuperación de otro (debe haber transcurrido al menos un periodo de 6 meses libre de síntomas tras el episodio previo).

El riesgo de recurrencia en pacientes con DM es elevado y aumenta en función del número de episodios experimentados, siendo de un 50 % después de un primer episodio, de un 70 % tras dos episodios y de hasta el 90 % tras tres episodios.

En el caso de la psicosis, entre el % y el 50 % los pacientes con un primer episodio sufren una recurrencia durante el primer año de enfermedad.

Por definición, el TB es un trastorno mental grave, crónico y recurrente del estado de ánimo. Tras los episodios francos puede aparecer un intervalo libre de síntomas, sin embargo, la sintomatología subsindrómica es muy frecuente entre episodios.

En los tres casos, el principal factor de riesgo para la recurrencia es la suspensión del tratamiento.

FUERZA DE LA RECOMENDACIÓN:

D - Evidencia de nivel 3 4. Evidencia extrapolada de estudios de nivel 2+.

FUENTE/S DE INFORMACIÓN: Documentación clínica.

**INDICADORES COMUNES: DEPRESIÓN MAYOR, ESQUIZOFRENIA Y TRASTORNO BIPOLAR**

**RESULTADO/DM-ESQ-TB. RECURRENCIA**

**CRITERIO 2. Recurrencias en pacientes con DM-ESQ-TB**

BIBLIOGRAFÍA:

- Fraguas D, Llorente C, Rapado-Castro M, et al. Actitud respecto a la medicación antipsicótica como factor predictivo de la suspensión del tratamiento antipsicótico en el período inicial de la psicosis de inicio temprano. Rev Psiquiatr Salud Ment (Barc). 2008;1:10-7.
- García-Herrera Pérez Bryan JM, Nogueras Morillas EV, Muñoz Cobos F, Morales Asencio JM. Guía de Práctica Clínica para el tratamiento de la depresión en Atención Primaria. Distrito Sanitario Málaga-UGC Salud Mental Hospital Regional Universitario “Carlos Haya”. Málaga; 2011.
- Gili M, Vicens C, Roca M, Andersen McMillan D. Interventions for preventing relapse or recurrence of depression in primary health care settings: A systematic review. Prev Med. 2015;76 Suppl:S16-21.
- Grande I, Berk M, Birmaher B, Vieta E. Bipolar disorder. Lancet. 2016;387(10027):1561-72.
- Grupo de Trabajo de la Guía de Práctica Clínica sobre Trastorno Bipolar. Guía de Práctica Clínica sobre Trastorno Bipolar. Madrid: Plan de Calidad para el Sistema Nacional de Salud del Ministerio de Sanidad, Servicios Sociales e Igualdad. Universidad de Alcalá. Asociación Española de Neuropsiquiatría. 2012. UAH AEN Núm. 2012/1.
- Roca M, García-Toro M, García-Campayo J, et al. Clinical differences between early and late remission in depressive patients. J Affect Disord. 2011;134(1-3):235-41.

**CRITERIOS DE CALIDAD EN PSIQUIATRÍA**

**RESULTADO/DM-ESQ-TB. REMISIÓN**

**CRITERIO 3. Remisiones en pacientes con DM-ESQ-TB**

DEFINICIÓN: Pacientes con DM-ESQ-TB en remisión.

FÓRMULA: Proporción de pacientes con DM-ESQ-TB en remisión / Total de pacientes con DM-ESQ-TB × 100.

INDICADOR DE: Resultado.

JUSTIFICACIÓN / EXCLUSIONES / ACLARACIONES: En la depresión, los nuevos antidepresivos de tercera generación (trazodona, nefazodona, fluoxetina, fluvoxamina, sertralina, paroxetina, citalopram, venlafaxina, eboxetina, mirtazapina) presentan tasas de remisión superiores al placebo, mientras que los antidepresivos de segunda generación (maprotilina, mianserina, viloxacina, trazodona, bupropión, amoxapina) no consiguen alcanzar la remisión en más de la mitad de los casos. Existe consenso en que el tratamiento farmacológico debe mantenerse después de la remisión, sin embargo, existen discrepancias en cuanto al tiempo.

La mayoría de los pacientes con esquizofrenia alternan en su curso clínico episodios psicóticos agudos con fases estables de emisión total o parcial, siendo frecuentes los síntomas residuales entre episodios. La mayoría de estas personas presentan exacerbaciones y remisiones, siendo menos frecuente la ausencia de nuevos episodios y la persistencia crónica un estado psicótico grave. En esta enfermedad, la remisión completa, entendida como el restablecimiento del nivel de funcionalidad previo a la aparición del trastorno, no es frecuente.

En el TB, el tratamiento combinado de un antipsicótico atípico, un eutimizante o estabilizador del humor y un antidepresivo está significativamente relacionado con la consecución de la remisión sintomática durante 12 meses.

FUERZA DE LA RECOMENDACIÓN:

D - Evidencia de nivel 3 o 4. Evidencia extrapolada de estudios de nivel 2+.

FUENTE/S DE INFORMACIÓN: Documentación clínica.

**INDICADORES COMUNES: DEPRESIÓN MAYOR, ESQUIZOFRENIA Y TRASTORNO BIPOLAR**

**RESULTADO/DM-ESQ-TB. REMISIÓN**

**CRITERIO 3. Remisiones en pacientes con DM-ESQ-TB**

BIBLIOGRAFÍA:

- García-Herrera Pérez Bryan JM, Nogueras Morillas EV, Muñoz Cobos F, Morales Asencio JM. Guía de Práctica Clínica para el tratamiento de la depresión en Atención Primaria. Distrito Sanitario Málaga-UGC Salud Mental Hospital Regional Universitario “Carlos Haya”. Málaga; 2011.
- Grupo de Trabajo de la Guía de Práctica Clínica sobre el Manejo de la Depresión en el Adulto. Guía de Práctica Clínica sobre el Manejo de la Depresión en el Adulto. Minis- terio de Sanidad, Servicios Sociales e Igualdad. Agencia de Evaluación de Tecnologías Sanitarias de Galicia (avalia-t); 2014. Guías de Práctica Clínica en el SNS: Avalia-t 2013/06.
- Grupo de Trabajo de la Guía de Práctica Clínica sobre la Esquizofrenia y el Trastorno Psicótico Incipiente. Fòrum de Salut Mental, coordinación. Guía de Práctica Clínica sobre la Esquizofrenia y el Trastorno Psicótico Incipiente. Madrid: Plan de Calidad para el Sistema Nacional de Salud del Ministerio de Sanidad y Consumo. Agència d’Avaluació de Tecnologia i Recerca Mèdiques; 2009. Guía de Práctica Clínica: AATRM. Nº 2006/05-2.
- Rapport D, Kaplish D, McGrady A, et al. A descriptive analysis of factors leading to a 1-year remission in bipolar disorder. J Psychiatr Pract. 2015;21:351-8.
- Van Os J, Burns T, Cavallaro R, et Standardized emission criteria in schizophrenia. Acta Psychiatr Scand. 2006;113(2):91-5.

**CRITERIOS DE CALIDAD EN PSIQUIATRÍA**

**RESULTADO/DM-ESQ-TB. SUICIDIO**

**CRITERIO 4. Suicidios en pacientes con DM-ESQ-TB**

DEFINICIÓN: Proporción de pacientes con DM-ESQ-TB que se suicidan.

FÓRMULA: Pacientes con DM-ESQ-TB que se suicidan / Total de pacientes con DM-ESQ- TB × 100.

INDICADOR DE: Resultado.

JUSTIFICACIÓN / EXCLUSIONES / ACLARACIONES: La DM es uno de los factores más relacionados con la conducta suicida. En personas con DM los principales factores de riesgo de suicidio son: antecedentes de intentos de suicidio previos, antecedentes familiares de suicidio, trastorno límite de la personalidad, impulsividad, desesperanza, eventos vitales tempranos traumáticos, estrés vital, bajo apoyo social, sexo masculino, abuso o dependencia de alcohol u otras drogas. Por otra parte, este riesgo es mayor durante el episodio de DM y el periodo de remisión parcial.

El riesgo de suicidio en pacientes con esquizofrenia está relacionado con la presencia de alucinaciones y depresión, siendo la tasa de suicidio en estos pacientes de un 10 %.

En el TB las autopsias psicológicas sugieren que suicidio se produce cuando la DM es infradiagnosticada e infratratada (sobre todo en TB II) y cuando no hay tratamiento de mantenimiento. El riesgo de suicidio en estos pacientes es mayor cuando se da un viraje rápido de manía hipomanía a DM. En pacientes con TB I se han identificado los siguientes factores de riesgo: la historia previa de intentos de suicidios, el número de episodios depresivos y el abandono emocional en la infancia. La incidencia de muerte por suicidio en pacientes con TB es alta y puede llegar a ser 20 veces mayor que en la población general, sobre todo si se tienen en cuenta los casos de TB no tratado.

FUERZA DE LA RECOMENDACIÓN:

 Práctica recomendada basada en la experiencia clínica y el consenso del equipo redactor.

FUENTE/S DE INFORMACIÓN: Documentación clínica.

**INDICADORES COMUNES: DEPRESIÓN MAYOR, ESQUIZOFRENIA Y TRASTORNO BIPOLAR**

**RESULTADO/DM-ESQ-TB. SUICIDIO**

**CRITERIO 4. Suicidios en pacientes con DM-ESQ-TB**

BIBLIOGRAFÍA:

- Cheek SM, Nestor BA, Liu RT. Substance use and suicidality: specificity of substance use by injection to suicide attempts in a nationally representative sample of adults with major depression. Depress Anxiety. 2015. doi: 10.1002/da.22407.
- Grande I, Berk M, Birmaher B, Vieta E. Bipolar disorder. Lancet. 2015. pii: S0140- 6736(15)00241-X. doi: 10.1016/S0140-6736(15)00241-X.
- Grupo de Trabajo de la Guía de Práctica Clínica sobre el Manejo de la Depresión en el Adulto. Guía de Práctica Clínica sobre el Manejo de la Depresión en el Adulto. Ministerio de Sanidad, Servicios Sociales e Igualdad. Agencia de Evaluación de Tecnologías Sanitarias de Galicia (avalia-t); 2014. Guías de Práctica Clínica en el SNS: Avalia-t 2013/06.
- Grupo de Trabajo de la Guía de Práctica Clínica sobre la Esquizofrenia y el Trastorno Psicótico Incipiente. Fòrum de Salut Mental, coordinación. Guía de Práctica Clínica sobre la Esquizofrenia y el Trastorno Psicótico Incipiente. Madrid: Plan de Calidad para el Sistema Nacional de Salud del Ministerio de Sanidad y Consumo. Agència d’Avaluació de Tecnologia i Recerca Mèdiques; 2009. Guía de Práctica Clínica: AATRM. Nº 2006/05-2.
- Grupo de Trabajo de la Guía de Práctica Clínica sobre Trastorno Bipolar. Guía de Práctica Clínica sobre Trastorno Bipolar. Madrid: Plan de Calidad para el Sistema Nacional de Salud del Ministerio de Sanidad, Servicios Sociales e Igualdad. Universidad de Alcalá. Asociación Española de Neuropsiquiatría. 2012. UAH / AEN Núm. 2012/1.
- Kjelby E, Sinkeviciute I, Gjestad R, al. Suicidality schizophrenia spectrum disorders: the relationship to hallucinations and persecutory delusions. Eur Psychiatry. 2015;30:830-6.
- Mert DG, Kelleci M, Mizrak A, Semiz M, Demir MO. Factors associated with attempts in patients with bipolar disorder type I. Psychiatr Danub. 2015;27:236-41.
- Jiménez E, Arias B, Mitjans M, et al. Clinical features, impulsivity, temperament and functioning and their role in suicidality in patients with bipolar disorder. Acta Psychiatr Scand. 2016;133(4):266-76.

**CRITERIOS DE CALIDAD EN PSIQUIATRÍA**

**RESULTADO/DM-ESQ-TB. CONDUCTA SUICIDA**

**CRITERIO 5. Conducta suicida en pacientes con DM-ESQ-TB**

DEFINICIÓN: Proporción de pacientes con DM-ESQ-TB en cuya evaluación se valoró el riesgo de suicidio teniendo en cuenta: intentos previos, otros trastornos mentales, abuso de sustancias, síntomas específicos y otros factores de riesgo.

FÓRMULA: Pacientes con DM-ESQ-TB que presentan conducta suicida / Total de pacientes con DM-ESQ-TB × 100.

INDICADOR DE: Resultado.

JUSTIFICACIÓN / EXCLUSIONES / ACLARACIONES: En la evaluación de la DM-ESQ-TB debe considerarse la seguridad y el riesgo de suicidio. En la valoración de este último es importante considerar los siguientes aspectos: (a) presencia de intentos de suicidio previos y abuso de sustancias; (b) síntomas específicos como desesperanza, ansiedad, agitación e ideación suicida, y

(c) otros factores de riesgo (comorbilidad, cronicidad, dolor o discapacidad, historia familiar de suicidio, factores sociales y antecedentes de suicidio en el entorno) (2++).

FUERZA DE LA RECOMENDACIÓN:

Q - Evidencia extraída de estudios cualitativos relevantes y de calidad. Esta categoría no está contemplada por el SIGN.

FUENTE/S DE INFORMACIÓN: Documentación clínica.

BIBLIOGRAFÍA:

- Grupo de Trabajo de la Guía de Práctica Clínica de Prevención y Tratamiento de la Conducta Suicida. Guía de Práctica Clínica de Prevención y Tratamiento de la Conducta Suicida. Santiago de Compostela: Agencia de Evaluación de Tecnologías Sanitarias de Galicia (avalia-t); 2012. Guías de Práctica Clínica en el SNS: avalia-t Nº 2010/02.
- Grupo de Trabajo de la Guía de Práctica Clínica sobre el Manejo de la Depresión en el Adulto. Guía de Práctica Clínica sobre el Manejo de la Depresión en el Adulto. Ministerio de Sanidad, Servicios Sociales Igualdad. Agencia de Evaluación de Tecnologías Sanitarias de Galicia (avalia-t); 2014. Guías de Práctica Clínica en el SNS: Avalia-t 2013/06.
- Jiménez E, Arias B, Mitjans M, et al. Clinical features, impulsivity, temperament and functioning and their role in suicidality in patients with bipolar disorder. Acta Psychiatr Scand. 2016;133(4):266-76.
- National Collaborating Centre for Mental Health. Depression. The treatment and management depression in adults. London: The British Psychological Society; 2009. Informe Nº: 90.
- Patten SB, Kennedy SH, Lam RW, et al. Canadian Network for Mood and Anxiety Treatments (CANMAT) Clinical Guidelines for the Management of Major Depressive Disorder in Adults. I. Classification, Burden and Principles of Management. J Affect Disord. 2009;117 Suppl 1:S5-14.

**INDICADORES COMUNES: DEPRESIÓN MAYOR, ESQUIZOFRENIA Y TRASTORNO BIPOLAR**

**RESULTADO/DM-ESQ-TB. REAGUDIZACIÓN DE LOS SÍNTOMAS**

**CRITERIO 6. Reagudización de los síntomas en pacientes con DM-ESQ-TB**

DEFINICIÓN: Proporción de pacientes con DM-ESQ-TB que presentan una reagudización de los síntomas.

FÓRMULA: Pacientes con DM-ESQ-TB que presentan una reagudización de los síntomas / Total de pacientes con DM-ESQ-TB × 100.

INDICADOR DE: Resultado.

JUSTIFICACIÓN / EXCLUSIONES / ACLARACIONES: La reagudización de los síntomas o reaparición de los mismos es una circunstancia frecuente en los pacientes que presentan un trastorno mental grave (DM, esquizofrenia o TB) debido a la naturaleza crónica y recurrente de estas enfermedades.

FUERZA DE LA RECOMENDACIÓN:

D - Evidencia de nivel 3 o 4. Evidencia extrapolada de estudios de nivel 2+.

FUENTE/S DE INFORMACIÓN: Documentación clínica.

BIBLIOGRAFÍA:

- Grupo de Trabajo de la Guía de Práctica Clínica sobre el Manejo de la Depresión en el Adulto. Guía de Práctica Clínica sobre el Manejo de la Depresión en el Adulto. Ministerio de Sanidad, Servicios Sociales Igualdad. Agencia de Evaluación de Tecnologías Sanitarias de Galicia (avalia-t); 2014. Guías de Práctica Clínica en el SNS: Avalia-t 2013/06.
- Grupo de Trabajo de la Guía de Práctica Clínica sobre la Esquizofrenia y el Trastorno Psicótico Incipiente. Fòrum de Salut Mental, coordinación. Guía de Práctica Clínica sobre la Esquizofrenia y el Trastorno Psicótico Incipiente. Madrid: Plan de Calidad para el Sistema Nacional de Salud del Ministerio de Sanidad y Consumo. Agència d’Avaluació de Tecnologia i Recerca Mèdiques; 2009. Guía de Práctica Clínica: AATRM. Nº 2006/05-2.
- Grupo de Trabajo de la Guía de Práctica Clínica sobre Trastorno Bipolar. Guía Práctica Clínica sobre Trastorno Bipolar. Madrid: Plan de Calidad para el Sistema Nacional de Salud del Ministerio de Sanidad, Servicios Sociales e Igualdad. Universidad de Alcalá. Asociación Española de Neuropsiquiatría. 2012. UAH AEN Núm. 2012/1.

**CRITERIOS DE CALIDAD EN PSIQUIATRÍA**

**RESULTADO/DM-ESQ-TB. NUEVO INGRESO HOSPITALARIO**

**CRITERIO 7. Reingresos hospitalarios de pacientes con DM-ESQ-TB**

DEFINICIÓN: Proporción de pacientes con DM-ESQ-TB que reingresan en un periodo de tiempo inferior a 30 días.

FÓRMULA: Pacientes con DM-ESQ-TB que reingresan en un periodo de tiempo inferior a 30 días / Total de pacientes con DM-ESQ-TB con al menos un ingreso hospitalario × 100.

INDICADOR DE: Resultado.

JUSTIFICACIÓN / EXCLUSIONES / ACLARACIONES: Las tasas de reingresos no planificados (en los 30 días siguientes al alta) en pacientes con diagnóstico de trastorno esquizofrénico y bipolar se recogían en la Estrategia de Salud Mental del Sistema Sanitario Nacional de 2009-2013 como indicadores de calidad.

Se considera reingreso el que ocasiona una misma persona de manera no programada en periodo de tiempo inferior a 30 días tras alta, y por la misma causa. Los datos obtenidos del CMBD para el año 2013 reflejan un porcentaje de reingresos del 10,03 % en el caso de enfermedades y trastornos mentales.

El tratamiento en Hospital de Día tras ingreso en la Unidad de Agudos disminuye la du- ración de la estancia y el número de reingresos en pacientes con trastorno mental grave.

FUERZA DE LA RECOMENDACIÓN:

B - Evidencia suficiente derivada de estudios nivel 2++, directamente aplicable a la población diana y que demuestren consistencia global en los resultados. Evidencia extrapolada de estudios de nivel 1++ o 1+.

FUENTE/S DE INFORMACIÓN: Documentación clínica.

**INDICADORES COMUNES: DEPRESIÓN MAYOR, ESQUIZOFRENIA Y TRASTORNO BIPOLAR**

**RESULTADO/DM-ESQ-TB. NUEVO INGRESO HOSPITALARIO**

**CRITERIO 7. Reingresos hospitalarios de pacientes con DM-ESQ-TB**

BIBLIOGRAFÍA:

- Creed F, Black D, Anthony P, Osborn M, Thomas P, Tomsenson B. Randomised controlled trial of day patient versus inpatient psychiatric treatment. BMJ. 1990;300:1033-7.
- Creed F, Mbaya P, Lancashire S, Tomenson B, Williams B, Holme S. Cost effectiveness of day and in-patient psychiatric treatment. BMJ. 1997;314:1381-5.
- Dick P, Cameron L, Cohen D, Barlow M, Ince A. Day and full time psychiatric treatment: a controlled comparison. Br J Psychiatry. 1985;147:246-9.
- Glick ID, Fleming L, DeChillo N, et al. A controlled study of transitional day care for non-chronically ill patients. Am J Psychiatry. 1986;143:1551-6.
- Grupo de Trabajo de la Guía de Práctica Clínica sobre Trastorno Bipolar. Guía de Práctica Clínica sobre Trastorno Bipolar. Madrid: Plan de Calidad para el Sistema Nacional de Salud del Ministerio de Sanidad, Servicios Sociales e Igualdad. Universidad de Alcalá. Asociación Española de Neuropsiquiatría. 2012. UAH / AEN Núm. 2012/1.
- Linn MW, Caffey EM, Klett C, J, Hogarty GE, Lamb HR. Day treatment and psychotropic drugs in the aftercare of schizophrenic patients. Arch Gen Psychiatry. 1979;36:1055-66.
- Ministerio de Sanidad, Política Social e Igualdad. Estrategia en Salud Mental del Sistema Nacional de Salud 2009-2013.
- Sledge WH, Tebes J, Wolff N, Helminiak TW. Day hospital/crisis respite care versus inpatient care, Part 2: Service utilization and costs. Am J Psychiatry. 1996;153:1074-83.

**CRITERIOS DE CALIDAD EN PSIQUIATRÍA**

**RESULTADO/DM-ESQ-TB. DISFUNCIÓN SEXUAL**

**CRITERIO 8. Disfunción sexual en pacientes con DM-ESQ-TB**

DEFINICIÓN: Proporción de pacientes con DM-ESQ-TB que presentan disfunción sexual.

FÓRMULA: Pacientes con DM-ESQ-TB que presentan disfunción sexual / Total de pacientes con DM-ESQ-TB × 100.

INDICADOR DE: Resultado.

JUSTIFICACIÓN / EXCLUSIONES / ACLARACIONES: Entre la DM y la disfunción sexual parece existir una relación biunívoca aunque se desconoce la dirección de causalidad. Diversos estudios han puesto de manifiesto que los pacientes con DM, en comparación con población no depresiva, presentan con mayor frecuencia: disminución de la libido (32-61 %), aumento de la libido (14,6-22 %), impotencia (35 %), eyaculación precoz (38 %), eyaculación retardada (47 %), anorgasmia (34 %) y disminución de la función sexual (63 %).

Los pacientes psicóticos, aunque presentan diferencias con respecto a la población general en el área sexual, estas cada vez son menores. La tercera parte de los pacientes diagnosticados de esquizofrenia tienen algún tipo de actividad que consideran importante. En algunos casos aparece descenso del deseo sexual y problemas eyaculatorios. En el TB, la actividad sexual del paciente viene marcada por el estadio en el que se encuentra. Los episodios maníacos se caracterizan por una hipersexualidad acompañada de promiscuidad, mientras que en los episodios depresivos es más frecuente la disminución de la libido. La aparición de disfunción sexual secundaria al uso de antipsicóticos con frecuencia está subestimada a menudo compromete el cumplimiento del tratamiento a largo plazo. Por otra parte, existen estudios que sugieren que la disfunción sexual puede estar presente antes de la aparición de la psicosis.

FUERZA DE LA RECOMENDACIÓN:

D - Evidencia de nivel 3 o 4. Evidencia extrapolada de estudios de nivel 2+.

FUENTE/S DE INFORMACIÓN: Documentación clínica.

**INDICADORES COMUNES: DEPRESIÓN MAYOR, ESQUIZOFRENIA Y TRASTORNO BIPOLAR**

**RESULTADO/DM-ESQ-TB. DISFUNCIÓN SEXUAL**

**CRITERIO 8. Disfunción sexual en pacientes con DM-ESQ-TB**

BIBLIOGRAFÍA:

- Ashton AK, Ahrens K, Gupta S, Masand PS. Antidepressant-induced sexual dysfunction and Ginkgobiloba [letter]. Am J Psychiatry. 2000;157:836-7.
- Marques TR, Smith S, Bonaccorso S, et al. Sexual dysfunction in people with prodromal or first-episode psychosis. Br J Psychiatry. 2012;201:131-6.
- Pacchiarotti I, Murru A, Kotzalidis GD, et al. Hyperprolactinemia and medications for bipolar disorder: systematic review of a neglected issue in clinical practice. Eur Neuropsychopharmacol. 2015 ;25(8):1045-59.
- Rico-Villademoros F, García-García M. Depresión y disfunción sexual. En: Montejo AL, editor. Sexualidad y salud mental. Barcelona: Editorial Glosa; 2005. p. 73-80.
- Rico-Villademoros F, García-García M. Sexualidad en esquizofrenia. En: Montejo AL, editor. Sexualidad y salud mental. Barcelona: Editorial Glosa; 2005. p. 117-28.

**CRITERIOS DE CALIDAD EN PSIQUIATRÍA**

**RESULTADO/DM-ESQ-TB. DAÑOS FÍSICOS**

**CRITERIO 9. Daños físicos (fracturas, caídas) en pacientes con DM-ESQ-TB**

DEFINICIÓN: Proporción de pacientes con DM-ESQ-TB que presentan daños físicos (frac- turas, caídas, etc.).

FÓRMULA: Pacientes con DM-ESQ-TB que presentan daños físicos / Total de pacientes con DM-ESQ-TB × 100.

INDICADOR DE: Resultado.

JUSTIFICACIÓN / EXCLUSIONES / ACLARACIONES: Según el estudio EARCAS, las caídas (en deambulación, en el baño o en la habitación) son uno de los eventos adversos que, según expertos, con mayor frecuencia se producen en las residencias y centros sociosanitarios. Por otro lado, se ha visto que en el entorno hospitalario una de las unidades en las que más caídas se producen es la de Salud Mental.

FUERZA DE LA RECOMENDACIÓN:

D - Evidencia de nivel 3 o 4. Evidencia extrapolada de estudios de nivel 2+.

FUENTE/S DE INFORMACIÓN: Documentación clínica.

BIBLIOGRAFÍA:

- Agencia de Seguridad Nacional del Paciente. Con la seguridad en mente: Servicios de salud mental y seguridad del paciente; Ministerio de Sanidad y Consumo. Plan de Calidad para el Sistema Nacional de Salud; 2006. Disponible en: http://www.msssi. gob.es/organizacion/sns/planCalidadSNS/docs/seguridad_en_mente.pdf
- Estudio EARCAS. Eventos Adversos en Residencias y Centros Asistenciales Sociosanitarios. Ministerio de Sanidad, Política Social e Igualdad; 2011. Disponible en:http://[www.msssi.gob.es/organizacion/sns/planCalidadSNS/docs/EARCAS.pdf](http://www.msssi.gob.es/organizacion/sns/planCalidadSNS/docs/EARCAS.pdf)
- Laguna-Parras JM, Arrabal-Orpez MJ, Zafra-López F, et al. Incidencia de caídas en un hospital de nivel 1: factores relacionados. Gerokomos. 2011;22:167-73.

**INDICADORES COMUNES: DEPRESIÓN MAYOR, ESQUIZOFRENIA Y TRASTORNO BIPOLAR**

**RESULTADO/DM-ESQ-TB. PROGRAMAS PSICOEDUCATIVOS**

**CRITERIO 10. Programas psicoeducativos para pacientes con DM-ESQ-TB**

DEFINICIÓN: Proporción de pacientes con DM-ESQ-TB a los que se les ofrece psicoeducación.

FÓRMULA: Pacientes con DM-ESQ-TB a los que se les ofrece psicoeducación / T de pacientes con DM-ESQ-TB × 100.

INDICADOR DE: Resultado.

JUSTIFICACIÓN / EXCLUSIONES / ACLARACIONES: En pacientes con DM-ESQ-TB complementar el tratamiento farmacológico con determinadas intervenciones psicológicas estructuradas (psicoeducación, terapia cognitivo-conductual, terapia interpersonal y de ritmos sociales, intervención familiar) puede mejorar el curso de la enfermedad, reduciendo el riesgo de recaídas (1++). En pacientes con DM-ESQ-TB en tratamiento farmacológico, la psicoeducación individual centrada el entrenamiento para la identificación precoz y actuación ante los pródromos es eficaz para la prevención de episodios maníacos (1+).

FUERZA DE LA RECOMENDACIÓN:

A - Al menos un metanálisis, revisión sistemática de ECA, o ECA de nivel 1++, directamente aplicables a la población diana, o evidencia suficiente derivada de estudios de nivel 1+, directamente aplicable a la población diana y que demuestren consistencia global en los resultados.

FUENTE/S DE INFORMACIÓN: Documentación clínica.

BIBLIOGRAFÍA:

- Goodwin GM, Haddad PM, Ferrier IN, et al. Evidence-based guidelines for treating bipolar disorder: Revised third edition recommendations from the British Association for Psychopharmacology. J Psychopharmacol. 2016 Mar 15. pii: 0269881116636545.
- Grupo de Trabajo de la Guía de Práctica Clínica sobre Trastorno Bipolar. Guía de Práctica Clínica sobre Trastorno Bipolar. Madrid: Plan de Calidad para el Sistema Nacional de Salud del Ministerio de Sanidad, Servicios Sociales e Igualdad. Universidad de Alcalá. Asociación Española de Neuropsiquiatría. 2012. UAH / AEN Núm. 2012/1.
- Lam DH, Burbeck R, Wright K, Pilling S. Psychological therapies in bipolar disorder: the effect of illness history on relapse prevention - A systematic review. Bipolar Disord. 2009;11(5):474-82.
- Miklowitz DJ, Scott J. Psychosocial treatments for bipolar disorder: cost-effectiveness, mediating mechanisms, and future directions. Bipolar Disord. 2009;11 Suppl
- Scott J, Colom F, Vieta E. A meta-analysis of relapse rates with adjunctive psychological therapies compared to usual psychiatric treatment for bipolar disorders. Int J Neuropsychopharmacol. 2007;10(1):123-9.

**CRITERIOS DE CALIDAD EN PSIQUIATRÍA**

**RESULTADO/DM-ESQ-TB. ADHERENCIA AL TRATAMIENTO FARMACOLÓGICO**

**CRITERIO 11. Adherencia al tratamiento farmacológico en pacientes con DM-ESQ-TB**

DEFINICIÓN: Proporción de pacientes con DM-ESQ-TB que presentan una buena adherencia al tratamiento farmacológico.

FÓRMULA: Pacientes con DM-ESQ-TB que presentan una buena adherencia al tratamiento farmacológico / Total de pacientes con DM-ESQ-TB en tratamiento farmacológico × 100.

INDICADOR DE: Resultado.

JUSTIFICACIÓN / EXCLUSIONES / ACLARACIONES: En pacientes con DM los problemas de incumplimiento del tratamiento farmacológico pueden darse hasta en el 50-60 % de los casos. Algunos los factores relacionados con la falta de adherencia son: la propia naturaleza del trastorno, el periodo de latencia de los antidepresivos, la aparición de efectos secundarios las ideas irracionales sobre la medicación.

En pacientes con esquizofrenia el problema de la baja adherencia alcanza porcentajes similares. Algunos factores que pueden explicar el incumplimiento del tratamiento farmacológico son: la aparición de efectos secundarios y la baja conciencia de enfermedad. En pacientes con TB la tasa de baja adherencia supera el 40 % y el factor más relevante es la falta de conciencia de enfermedad.

FUERZA DE LA RECOMENDACIÓN:

D - Evidencia de nivel 3 o 4. Evidencia extrapolada de estudios de nivel 2+.

FUENTE/S DE INFORMACIÓN: Documentación clínica.

BIBLIOGRAFÍA:

- Calabozo Freile B, Aparicio Fernández MA, Blanco Garrote JA, et al. Trastornos de espectro depresivo: menos medicamentos y más cuidados. Sacylite, Boletín de Información Terapéutica. 2014;1:1-4.
- Grupo de Trabajo de la Guía de Práctica Clínica sobre el Manejo de la Depresión en el Adulto. Guía de Práctica Clínica sobre el Manejo de la Depresión en el Adulto. Ministerio de Sanidad, Servicios Sociales e Igualdad. Agencia de Evaluación de Tecnologías Sanitarias de Galicia (avalia-t); 2014. Guías de Práctica Clínica en el SNS: Avalia-t 2013/06.
- Grupo de Trabajo de la Guía de Práctica Clínica sobre la Esquizofrenia y el Trastorno Psicótico Incipiente. Fòrum de Salut Mental, coordinación. Guía de Práctica Clínica sobre la Esquizofrenia el Trastorno Psicótico Incipiente. Madrid: Plan de Calidad para el Sistema Nacional de Salud del Ministerio de Sanidad y Consumo. Agència d’Avaluació de Tecnologia i Recerca Mèdiques; 2009. Guía de Práctica Clínica: AATRM. Nº 2006/05-2.
- Murru A, Pacchiarotti I, Amann BL, Nivoli AM, Vieta E, Colom F. Treatment adherence in bipolar I and schizoaffective disorder, bipolar type. J Affect Disord. 2013;151(3):1003-8.

**INDICADORES COMUNES: DEPRESIÓN MAYOR, ESQUIZOFRENIA Y TRASTORNO BIPOLAR**

**RESULTADO/DM-ESQ-TB. ABUSO DE SUSTANCIAS TÓXICAS**

**CRITERIO 12. Abuso de sustancias tóxicas en pacientes con DM-ESQ-TB**

DEFINICIÓN: Proporción de pacientes con DM-ESQ-TB que presentan abuso de sustancias tóxicas.

FÓRMULA: Pacientes con DM-ESQ-TB que presentan abuso de sustancias tóxicas / Total de pacientes con DM-ESQ-TB × 100.

INDICADOR DE: Resultado.

JUSTIFICACIÓN / EXCLUSIONES / ACLARACIONES: Uno de los principales motivos que lleva al ser humano al abuso de sustancias tóxicas es el deseo de calmar un intenso malestar emocional. Por ello, la prevalencia del trastorno por abuso de sustancias es mayor en pacientes que sufren esquizofrenia, TB o DM (patología dual) que en la población general.

FUERZA DE LA RECOMENDACIÓN:

C - Evidencia suficiente derivada de estudios de nivel 2+, directamente aplicable a la población diana y que demuestren consistencia global en los resultados. Evidencia extrapolada de estudios de nivel 2++.

FUENTE/S DE INFORMACIÓN: Documentación clínica.

BIBLIOGRAFÍA:

- Grupo de Trabajo de la Guía de Práctica Clínica sobre el Manejo de la Depresión en el Adulto. Guía de Práctica Clínica sobre el Manejo de la Depresión en el Adulto. Ministerio de Sanidad, Servicios Sociales e Igualdad. Agencia de Evaluación de Tecnologías Sanitarias de Galicia (avalia-t); 2014. Guías de Práctica Clínica en el SNS: Avalia-t 2013/06.
- Grupo de Trabajo de la Guía de Práctica Clínica sobre la Esquizofrenia y el Trastorno Psicótico Incipiente. Fòrum de Salut Mental, coordinación. Guía de Práctica Clínica sobre la Esquizofrenia y el Trastorno Psicótico Incipiente. Madrid: Plan de Calidad para el Sistema Nacional de Salud del Ministerio de Sanidad y Consumo. Agència d’Avaluació de Tecnologia i Recerca Mèdiques; 2009. Guía de Práctica Clínica: AATRM. Nº 2006/05-2.
- Vieta E, Colom F, Corbella B, et al. Clinical correlates of psychiatric comorbidity in bipolar I patients. Bipolar Disord. 2001;3(5):253-8.

**CRITERIOS DE CALIDAD EN PSIQUIATRÍA**

**RESULTADO/DM-ESQ-TB. MORTALIDAD**

**CRITERIO 13. Tasa de mortalidad en pacientes con DM-ESQ-TB**

DEFINICIÓN: Pacientes con DM-ESQ-TB que fallecen a causa del trastorno mental. FÓRMULA: Número de pacientes con DM-ESQ-TB que fallecen a causa del trastorno mental. INDICADOR DE: Resultado.

JUSTIFICACIÓN / EXCLUSIONES / ACLARACIONES: La tasa de mortalidad de personas con trastornos mentales se considera un indicador de calidad en salud mental por parte de la Organización para la Cooperación y el Desarrollo Económicos (OCDE), el European Observatory y el Sistema Nacional de Salud.

FUERZA DE LA RECOMENDACIÓN:

D - Evidencia de nivel 3 o 4. Evidencia extrapolada de estudios de nivel 2+.

FUENTE/S DE INFORMACIÓN: Documentación clínica.

BIBLIOGRAFÍA:

- Salvador-Carulla L, Salinas JA, Martín M, Grané M, Roca M, Bulbena A. Indicadores para la evaluación de sistemas de salud mental en España. Sociedad Española de Psiquiatría; 2010.

**INDICADORES COMUNES: DEPRESIÓN MAYOR, ESQUIZOFRENIA Y TRASTORNO BIPOLAR**

**RESULTADO/DM-ESQ-TB. ABANDONO DEL TRATAMIENTO**

**CRITERIO 14. Abandono del tratamiento en pacientes con DM-ESQ-TB**

DEFINICIÓN: Proporción de pacientes con DM-ESQ-TB que abandonan el tratamiento.

FÓRMULA: Pacientes con DM-ESQ-TB que abandonan el tratamiento / Total de pacientes con DM-ESQ-TB en tratamiento × 100.

INDICADOR DE: Resultado.

JUSTIFICACIÓN / EXCLUSIONES / ACLARACIONES: Se entiende por adherencia al tratamiento tanto el cumplimiento correcto de la pauta farmacológica como la asistencia a las citas programadas y el cumplimiento de las pautas de conductuales y de estilos de vida.

La tasa de abandono de los ISRS es similar a la de los antidepresivos de segunda generación. Las principales causas de abandono son los efectos secundarios y la falta de eficacia. Se ha constatado una alta tasa de abandono (78 %) del tratamiento de mantenimiento (mínimo 6 meses).

El abandono del tratamiento farmacológico del TB constituye la primera causa de recaída. Cerca del 50 % de los pacientes con TB abandonan la medicación por su cuenta a lo largo de la enfermedad y más del 90 % lo consideran en algún momento. Algunos de los facto- res que parecen estar asociados a la baja adherencia son: la ausencia baja conciencia de enfermedad, las ideas irracionales acerca de la medicación, el estigma social, los efectos secundarios y el consumo de tóxicos.

FUERZA DE LA RECOMENDACIÓN:

C - Evidencia suficiente derivada de estudios de nivel 2+, directamente aplicable a la población diana y que demuestren consistencia global en los resultados. Evidencia extrapolada de estudios de nivel 2++.

FUENTE/S DE INFORMACIÓN: Documentación clínica.

**CRITERIOS DE CALIDAD EN PSIQUIATRÍA**

**RESULTADO/DM-ESQ-TB. ABANDONO DEL TRATAMIENTO**

**CRITERIO 14. Abandono del tratamiento en pacientes con DM-ESQ-TB**

BIBLIOGRAFÍA:

- Colom F, Vieta E, Martinez-Aran A, Reinares M, Benabarre A, Gasto C. Clinical factors associated with treatment noncompliance in euthymic bipolar patients. J Clin Psychiatry. 2000;61:549-55.
- Czobor P, Van Dorn RA, Citrome L, Kahn RS, Fleischhacker WW, Volavka J. Treatment adherence schizophrenia: a patient-level meta-analysis of combined CATIE and EUFEST studies. Eur Neuropsychopharmacol. 2015;25(8):1158-66.
- Grupo de Trabajo de la Guía de Práctica Clínica sobre la Depresión Mayor en la Infancia y en la Adolescencia. Guía de Práctica Clínica sobre la Depresión Mayor en la Infancia y en la Adolescencia. Plan de Calidad para el Sistema Nacional de Salud del Ministerio de Sanidad y Política Social. Axencia de Avaliación de Tecnoloxías Sanitarias de Galicia (avalia-t); 2009. Guías de Práctica Clínica en el SNS: avalia-t Nº 2007/09.
- Grupo de Trabajo de la Guía de Práctica Clínica sobre Trastorno Bipolar. Guía de Práctica Clínica sobre Trastorno Bipolar. Madrid: Plan de Calidad para el Sistema Nacional de Salud del Ministerio de Sanidad, Servicios Sociales e Igualdad. Universidad de Alcalá. Asociación Española de Neuropsiquiatría. 2012. UAH / AEN Núm. 2012/1.
- Jamison K, Gerner R, Goodwin F. Patient and physician attitudes toward lithium. Arch Gen Psychiatry 1979;36:866-9.
- Keck PE Jr, McElroy SL, Strakowski SM, et al. Factors associated with pharmacologic noncompliance in patients with mania. J Clin Psychiatry. 1996;57:292-7.
- Serna MC, Cruz I, Real J, Gascó E, Galván Duration and adherence of antidepressant treatment (2003 to 2007) based on prescription database. Europe Psychiatry. 2010;25:206-13.

**INDICADORES COMUNES: DEPRESIÓN MAYOR, ESQUIZOFRENIA Y TRASTORNO BIPOLAR**

**RESULTADO/DM-ESQ-TB. CONTENCIÓN MECÁNICA**

**CRITERIO 15. Pacientes con DM-ESQ-TB que requieren contención mecánica**

DEFINICIÓN: Proporción de pacientes con DM-ESQ-TB que requieren contención mecánica.

FÓRMULA: Pacientes con DM-ESQ-TB que requieren contención mecánica / Total de pacientes con DM-ESQ-TB × 100.

INDICADOR DE: Resultado.

JUSTIFICACIÓN / EXCLUSIONES / ACLARACIONES: La contención mecánica, también denominada inmovilización terapéutica, es un procedimiento que se aplica para la restricción del paciente agitado.

La agitación puede tener origen psiquiátrico, siendo frecuente en pacientes con esquizofrenia, trastorno esquizoafectivo o en fase maníaca del TB.

Este proceso consiste en la utilización dispositivos de sujeción mecánica para limitar la movilidad física de una parte del cuerpo o de la totalidad del mismo como medida extrema. Generalmente, es el personal de enfermería el encargado de aplicar la contención en respuesta a la solicitud del médico responsable. En la mayoría de los casos la contención mecánica se lleva a cabo en contra de la voluntad del paciente.

Se ha estimado que el 25 % de los pacientes con esquizofrenia y el 15 % de los pacientes con TB experimentan un episodio de agitación al año. Asimismo, la prevalencia de la con- tención mecánica es de entre el 8 % y el 24 % en pacientes atendidos en Servicios de Urgencia y cerca del 22 % en pacientes atendidos en Servicios de Psiquiatría. El coste anual estimado de la aplicación de este procedimiento en pacientes agitados con esquizofrenia o TB se ha estimado en 27.208.115 €.

FUERZA DE LA RECOMENDACIÓN:

D - Evidencia de nivel 3 o 4. Evidencia extrapolada de estudios de nivel 2+.

FUENTE/S DE INFORMACIÓN: Documentación clínica.

**CRITERIOS DE CALIDAD EN PSIQUIATRÍA**

**RESULTADO/DM-ESQ-TB. CONTENCIÓN MECÁNICA**

**CRITERIO 15. Pacientes con DM-ESQ-TB que requieren contención mecánica**

BIBLIOGRAFÍA:

- Garrido Viñado E, Lizano-Díez I, Roset Arissó PN, Villagrán Moreno JM, Mur de Viu B. El coste económico de los procedimientos de contención mecánica de origen psiquiátrico en España. Psiq Biol. 2015;22:12-6.
- Garriga M, Pacchiarotti I, Kasper S, et al. Assessment and management of agitation in psychiatry: Expert consensus. World Biol Psychiatry. 2016;17(2):86-128.
- Grupo de Trabajo de la Guía de Práctica Clínica sobre la Esquizofrenia y el Trastorno Psicótico Incipiente. Fòrum de Salut Mental, coordinación. Guía de Práctica Clínica sobre la Esquizofrenia y el Trastorno Psicótico Incipiente. Madrid: Plan de Calidad para el Sistema Nacional de Salud del Ministerio de Sanidad y Consumo. Agència d’Avaluació de Tecnologia i Recerca Mèdiques; 2009. Guía de Práctica Clínica: AATRM. Nº 2006/05-2.
- Grupo de Trabajo de la Guía de Práctica Clínica sobre Trastorno Bipolar. Guía de Práctica Clínica sobre Trastorno Bipolar. Madrid: Plan de Calidad para el Sistema Nacional de Salud del Ministerio de Sanidad, Servicios Sociales e Igualdad. Universidad de Alcalá. Asociación Española de Neuropsiquiatría. 2012. UAH / AEN Núm. 2012/1.
- Sastre Rus M, Campaña Castillo F. Contención mecánica: definición conceptual. Ene. 2014;8 [versión online]. Disponible en: doi: 10.4321/S1988-348X2014000100007.

**INDICADORES COMUNES: DEPRESIÓN MAYOR, ESQUIZOFRENIA Y TRASTORNO BIPOLAR**

**RESULTADO/DM-ESQ-TB. SALUD FÍSICA**

**CRITERIO 16. Diabetes en pacientes con DM-ESQ-TB**

DEFINICIÓN: Proporción de pacientes con DM-ESQ-TB diagnosticados de diabetes.

FÓRMULA: Pacientes con DM-ESQ-TB diagnosticados de diabetes / Total de pacientes con DM-ESQ-TB × 100.

INDICADOR DE: Resultado.

JUSTIFICACIÓN / EXCLUSIONES / ACLARACIONES: El 70 % de las personas con esquizofrenia presenta al menos otro trastorno médico, siendo uno de los más frecuentes la diabetes. En estos pacientes el riesgo incrementado de desarrollar anomalías en la regulación de la glucosa así como resistencia a la insulina y diabetes tipo 2 se debe al tratamiento con agentes antipsicóticos y a factores de estilo de vida (dieta pobre, sedentarismo).

La tercera parte de los pacientes con presentan anomalías en el metabolismo de la glucosa, lo que se asocia con un empeoramiento del funcionamiento global, una menor calidad de vida y peor respuesta al tratamiento.

FUERZA DE LA RECOMENDACIÓN:

D - Evidencia de nivel 3 o 4. Evidencia extrapolada de estudios de nivel 2+.

FUENTE/S DE INFORMACIÓN: Documentación clínica.

**INDICADORES COMUNES: DEPRESIÓN MAYOR, ESQUIZOFRENIA Y TRASTORNO BIPOLAR**

**RESULTADO/DM-ESQ-TB. SALUD FÍSICA**

**CRITERIO 16. Diabetes en pacientes con DM-ESQ-TB**

BIBLIOGRAFÍA:

- Bernardo M, Safont G, Oliveira C. Recomendaciones para la monitorización y promoción de la salud física en el paciente con esquizofrenia y otros trastornos mentales graves. Departament de Salut; 2014.
- Carney CP, Jones L, Woolson RF. Medical comorbidity in women and men with schizophrenia: population-based controlled study. J Gen Intern Med. 2006;21:1133-7.
- Davis W Starkstein SE, Bruce DG, Davis TM. The interactive effects of type 2 diabetes mellitus and schizophrenia on all-cause mortality: The Fremantle Diabetes Study. J Diabetes Complications. 2015;pii: S1056-8727.
- Grupo de Trabajo la Guía de Práctica Clínica sobre la Esquizofrenia y el Trastorno Psicótico Incipiente. Fòrum de Salut Mental, coordinación. Guía de Práctica Clínica sobre la Esquizofrenia y el Trastorno Psicótico Incipiente. Madrid: Plan de Calidad para el Sistema Nacional de Salud del Ministerio de Sanidad y Consumo. Agència d’Avaluació de Tecnologia i Recerca Mèdiques; 2009. Guía de Práctica Clínica: AATRM. Nº 2006/05-2.
- Grupo de Trabajo de la Guía de Práctica Clínica sobre Trastorno Bipolar. Guía de Práctica Clínica sobre Trastorno Bipolar. Madrid: Plan de Calidad para el Sistema Nacional de Salud del Ministerio de Sanidad, Servicios Sociales e Igualdad. Universidad de Alcalá. Asociación Española de Neuropsiquiatría. 2012. UAH / AEN Núm. 2012/1.
- Lambert TJ, Chapman LH. Diabetes, psychotic disorders and antipsychotic therapy: a consensus statement. Med Aust. 2004;181:544-8.
- Leopold K, Reif A, Haack et al. Type 2 diabetes and pre-diabetic abnormalities in patients with bipolar disorders. J Affect Disord. 2015;189:240-5.
- Ventriglio A, Gentile A, Stella E, Bellomo A. Metabolic issues in patients affected by schizophrenia: clinical characteristics and medical management. Front Neurosci. 2015;9:297.

**INDICADORES COMUNES: DEPRESIÓN MAYOR, ESQUIZOFRENIA Y TRASTORNO BIPOLAR**

**RESULTADO/DM-ESQ-TB. SALUD FÍSICA**

**CRITERIO 17. Síndrome metabólico en pacientes con DM-ESQ-TB**

DEFINICIÓN: Proporción de pacientes con DM-ESQ-TB diagnosticados de síndrome metabólico.

FÓRMULA: Pacientes con DM-ESQ-TB diagnosticados síndrome metabólico / Total de pacientes con DM-ESQ-TB × 100.

INDICADOR DE: Resultado.

JUSTIFICACIÓN / EXCLUSIONES / ACLARACIONES: La prevalencia del síndrome metabólico tanto en pacientes con esquizofrenia como con TB es cercana al 33 %. Existe una clara asociación entre el tratamiento con antipsicóticos y el riesgo de desarrollar síndrome metabólico, siendo significativamente mayor en el caso de la clozapina y la olanzapina y menor en el del aripiprazol.

FUERZA DE LA RECOMENDACIÓN:

D - Evidencia de nivel 3 o 4. Evidencia extrapolada de estudios de nivel 2+.

FUENTE/S DE INFORMACIÓN: Documentación clínica.

BIBLIOGRAFÍA:

- Aguilar E, Coronas R, Caixàs A. Síndrome metabólico en pacientes esquizofrénicos con tratamiento antipsicótico. Med Clin (Barc). 2012;139:542-46.
- Bernardo M, Safont G, Oliveira C. Recomendaciones para la monitorización y promoción de la salud física en el paciente con esquizofrenia y otros trastornos mentales graves. Departament de Salut; 2014.
- Grupo de Trabajo de la Guía de Práctica Clínica sobre la Esquizofrenia y el Trastorno Psicótico Incipiente. Fòrum de Salut Mental, coordinación. Guía de Práctica Clínica sobre la Esquizofrenia y el Trastorno Psicótico Incipiente. Madrid: Plan de Calidad para Sistema Nacional de Salud del Ministerio de Sanidad y Consumo. Agència d’Avaluació de Tecnologia i Recerca Mèdiques; 2009. Guía de Práctica Clínica: AATRM. Nº 2006/05-2.
- Grupo de Trabajo de la Guía de Práctica Clínica sobre Trastorno Bipolar Guía de Práctica Clínica sobre Trastorno Bipolar. Madrid: Plan de Calidad para el Sistema Nacional de Salud del Ministerio de Sanidad, Servicios Sociales e Igualdad. Universidad de Alcalá. Asociación Española de Neuropsiquiatría. 2012. UAH / AEN Núm. 2012/1.
- Rosso G, Cattaneo A, Zanardini R, Gennarelli M, Maina G, Bocchio-Chiavetto L. Glucose metabolism alterations in patients with bipolar disorder J Affect Disord. 2015;184:293-8.
- Vancampfort D, Stubbs B, Mitchell AJ, et al. Risk of metabolic syndrome and components in people with schizophrenia and related psychotic disorders, bipolar disorder and major depressive disorder: a systematic review and meta-analysis. World Psychiatry. 2015;14:339-47.

**CRITERIOS DE CALIDAD EN PSIQUIATRÍA**

**RESULTADO/DM-ESQ-TB. EVENTOS ADVERSOS**

**CRITERIO 18. Eventos adversos relacionados con la medicación en pacientes con DM-ESQ-TB**

DEFINICIÓN: Proporción de pacientes con DM-ESQ-TB que experimentan eventos adversos relacionados con la medicación.

FÓRMULA: Pacientes con DM-ESQ-TB que experimentan eventos adversos relacionados con la medicación / Total de pacientes con DM-ESQ-TB en tratamiento farmacológico × 100.

INDICADOR DE: Resultado.

JUSTIFICACIÓN / EXCLUSIONES / ACLARACIONES: Según refiere el informe *Con la seguridad en mente*, los problemas de seguridad del paciente atendidos en los dispositivos de Salud Mental en relación a la medicación son similares a los de otros ámbitos sanitarios, pero con la particularidad de los riesgos específicos inherentes a los psicofármacos y la vulnerabilidad de la población atendida. Se ha constatado una enorme variabilidad en la práctica clínica prescriptora, de forma individual o por servicios, así como un importante porcentaje ingresos debidos a efectos adversos de la medicación psicotrópica. Actualmente el perfil de los efectos secundarios está cambiando, y ha aumentado la preocupación por los problemas cardiovasculares y metabólicos de la población atendida, especialmente en el caso de los trastornos mentales graves.

En Salud Mental es frecuente que se dé la circunstancia de que el fármaco se prescriba para una enfermedad cuya indicación no está reconocida en la ficha técnica o que se utilice a dosis por encima de las recomendadas. También es frecuente la dosificación “según precise” en las plantas de ingreso así como la asociación de fármacos de la misma familia. Se verifican frecuentes fallos en la monitorización de efectos secundarios, tanto a nivel ambulatorio como hospitalario, lo que puede implicar, por ejemplo, un retardo en la detección y tratamiento de una diabetes. Los problemas en el seguimiento de la medicación antipsicótica es la causa de reclamación más frecuente en relación con los tratamientos en Salud Mental del NHS.

FUERZA DE LA RECOMENDACIÓN:

C - Evidencia suficiente derivada de estudios de nivel 2+, directamente aplicable a población diana y que demuestren consistencia global en los resultados. Evidencia extrapolada a estudios de nivel 2++.

FUENTE/S DE INFORMACIÓN: Documentación clínica.

**INDICADORES COMUNES: DEPRESIÓN MAYOR, ESQUIZOFRENIA Y TRASTORNO BIPOLAR**

**RESULTADO/DM-ESQ-TB. EVENTOS ADVERSOS**

**CRITERIO 18. Eventos adversos relacionados con la medicación en pacientes con DM-ESQ-TB**

BIBLIOGRAFÍA:

- Agencia de Seguridad Nacional del Paciente. Con seguridad en mente: Servicios de salud mental y seguridad del paciente; Ministerio de Sanidad y Consumo. Plan de Calidad para el Sistema Nacional de Salud; 2006. Disponible en: http://www.msssi. gob.es/organizacion/sns/planCalidadSNS/docs/seguridad_en_mente.pdf
- Aranaz-Andrés JM, Aibar-Remón C, Vitaller-Murillo J, Ruiz-López P, Limón-Ramírez R, Terol-García E, ENEAS Work Group. Incidence of adverse events related to health care in Spain: results of the Spanish National Study of Adverse Events. J Epidemiol Com- munity Health. 2008;62(12):1022-9.
- Bernardo M, Vieta E, Saiz Ruiz J, Rico-Villademoros F, Alamo C, Bobes J, Grupo RECAP. Recommendations for switching antipsychotics. A position statement of the Spanish Society of Psychiatry and the Spanish Society of Biological Psychiatry. Rev Psiquiatr Salud Ment. 2011;4(3):150-68.
- Grande I, Bernardo M, Bobes J, Saiz-Ruiz J, Álamo C, Vieta E. Antipsychotic switching in bipolar disorders: a systematic review. Int J Neuropsychopharmacol. 2014;17(3):497-507.
- Mira JJ, Navarro I, Guilabert M, Aranaz J. Eventos adversos relacionados con la medicación informados por los pacientes en atención primaria. Trauma Fund MAPFRE. 2013;24:48-53.
- Murru A, Hidalgo D, Bernardo M, et al. Antipsychotic switching in schizoaffective disorder: A systematic review. World J Biol Psychiatry 2015:1-19.

**CRITERIOS DE CALIDAD EN PSIQUIATRÍA**

**RESULTADO/DM-ESQ-TB. RECLAMACIONES ATENDIDAS**

**CRITERIO 19. Reclamaciones interpuestas por pacientes con DM-ESQ-TB que han sido atendidas**

DEFINICIÓN: Proporción de reclamaciones presentadas por pacientes con DM-ESQ-TB o sus familiares que reciben respuesta por parte de la institución.

FÓRMULA: Reclamaciones presentadas por pacientes con DM-ESQ-TB o por sus familia- res que reciben respuesta por parte de la institución en menos de 2 semanas / Total de reclamaciones presentadas por pacientes con DM-ESQ-TB o por sus familiares durante el periodo de tiempo analizado × 100.

INDICADOR DE: Resultado.

JUSTIFICACIÓN / EXCLUSIONES / ACLARACIONES: Según la Ley de Autonomía del Paciente, este tiene como derecho básico formular quejas, reclamaciones o sugerencias sobre funcionamiento de los servicios sanitarios y recibir respuesta de la Administración Sanitaria sobre las mismas en los términos establecidos por las disposiciones vigentes.

FUERZA DE LA RECOMENDACIÓN:

 Práctica recomendada basada en la experiencia clínica y el consenso del equipo redactor.

FUENTE/S DE INFORMACIÓN: Documentación clínica.

BIBLIOGRAFÍA:

- Ley 41/2002, de 14 de noviembre, básica reeguladora de la autonomía del paciente y de derechos y obligaciones en materia de información y documentación clínica.

**INDICADORES COMUNES: DEPRESIÓN MAYOR, ESQUIZOFRENIA Y TRASTORNO BIPOLAR**

**RESULTADO/DM-ESQ-TB. GASTO EN ATENCIÓN PSIQUIÁTRICA**

**CRITERIO 20. Gasto en la atención psiquiátrica de pacientes con DM-ESQ-TB**

DEFINICIÓN: Gasto en la atención psiquiátrica por pacientes con DM-ESQ-TB.

FÓRMULA: Gasto medio en euros por paciente con DM, esquizofrenia o TB en la atención psiquiátrica prestada, considerando costes de consulta, farmacia y, en su caso, ingreso hospitalario conforme referencia de cada Servicio de Salud.

INDICADOR DE: Resultado.

JUSTIFICACIÓN / EXCLUSIONES / ACLARACIONES: Este indicador depende de las estimaciones de costes de la Administración con competencias en salud o de los costes reales en aquellos casos en los que se pueda imputar.

FUERZA DE LA RECOMENDACIÓN:

 Práctica recomendada basada en la experiencia clínica y el consenso del equipo redactor.

FUENTE/S DE INFORMACIÓN: Administraciones sanitarias regionales.

BIBLIOGRAFÍA:

- Asociación científica PSICOST. 2003.
- Bernardo M, Mezquida G. Disease burden. Schizophrenia: a costly illness. In: Insights in the management of Schizophrenia. Hospital Pharmacy Europe. Otsuka Pharmaceuticals; 2014.
- Estrategia de Salud Mental del Sistema Nacional de Salud. 2009-2013. Disponible en: <http://www.msssi.gob.es/organizacion/sns/planCalidadSNS/docs/saludmental/Sa-> ludMental2009-2013.pdf
- Grupo de trabajo de la conferencia de presidentes para el análisis del gasto sanitario presidido por la IGAE. Informe para el análisis del gasto sanitario 2005. Ministerio de Economía y Hacienda. Secretaría de Estado de Hacienda y Presupuestos.
